# Supplementary material for: Aberrant Transferrin and Ferritin Upregulation Elicits Iron Accumulation and Oxidative Inflammaging Causing Ferroptosis and Undermines Estradiol Biosynthesis in Aging Rat Ovaries by Upregulating NF-Κb-Activated Inducible Nitric Oxide Synthase: First Demonstration of an Intricate Mechanism
Source: MDPI journal article supplement (doi:10.3390/ijms232012689), 2022-10-21
Supplement: s1 [file s1]

Supplementary table S6. Sequence distribution of molecular function (Filtered by #Seqs: cutoff= 3)

| GO-terms                                | #Seqs | Protein                                                       |
|-----------------------------------------|-------|---------------------------------------------------------------|
| binding                                 | 10    | Fth1, Phb, Hspa5, Ldhb, Fabp3, Cbr1, Ftl1, Hba1, Tf, Selenbp2 |
| protein binding                         | 10    | Fth1, Phb, Hspa5, Ldhb, Fabp3, Cbr1, Ftl1, Hba1, Tf, Selenbp2 |
| catalytic activity                      | 8     | Fth1, Hspa5, Ldhb, Gstt3, Cbr1, Ftl1, Tf, Hba1                |
| ion binding                             | 7     | Fth1, Hspa5, Fabp3, Cbr1, Ftl1, Tf, Hba1                      |
| heterocyclic compound binding           | 6     | Phb, Hspa5, Ldhb, Cbr1, Tf, Hba1                              |
| organic cyclic compound binding         | 6     | Phb, Hspa5, Ldhb, Cbr1, Tf, Hba1                              |
| small molecule binding                  | 6     | Hspa5, Fabp3, Ldhb, Cbr1, Hba1, Tf                            |
| oxidoreductase activity                 | 6     | Fth1, Ldhb, Gstt3, Cbr1, Ftl1, Hba1                           |
| metal ion binding                       | 5     | Fth1, Hspa5, Ftl1, Hba1, Tf                                   |
| cation binding                          | 5     | Fth1, Hspa5, Ftl1, Tf, Hba1                                   |
| anion binding                           | 4     | Hspa5, Fabp3, Cbr1, Tf                                        |
| nucleoside phosphate binding            | 4     | Hspa5, Ldhb, Cbr1, Tf                                         |
| nucleotide binding                      | 4     | Hspa5, Ldhb, Cbr1, Tf                                         |
| transition metal ion binding            | 4     | Fth1, Ftl1, Tf, Hba1                                          |
| iron ion binding                        | 4     | Fth1, Ftl1, Hba1, Tf                                          |
| transporter activity                    | 3     | Fabp3, Hba1, Tf                                               |
| ferric iron binding                     | 3     | Fth1, Ftl1, Tf                                                |
| hydrolase activity                      | 3     | Hspa5, Gstt3, Tf                                              |
| substrate-specific transporter activity | 3     | Fabp3, Tf, Hba1                                               |
| enzyme binding                          | 3     | Phb, Hspa5, Ldhb                                              |
