# Supplementary material for: Aberrant Transferrin and Ferritin Upregulation Elicits Iron Accumulation and Oxidative Inflammaging Causing Ferroptosis and Undermines Estradiol Biosynthesis in Aging Rat Ovaries by Upregulating NF-Κb-Activated Inducible Nitric Oxide Synthase: First Demonstration of an Intricate Mechanism
Source: MDPI journal article supplement (doi:10.3390/ijms232012689), 2022-10-21
Supplement: s1 [file s1]

Supplementary table S5. Sequence distribution of cellular component (Filtered by #Seqs: cutoff= 5)

| GO-Terms                                 | #Seqs | Protein                                                                  |
|------------------------------------------|-------|--------------------------------------------------------------------------|
| intracellular organelle                  | 11    | Fth1, Phb, Hspa5, Fabp3, Ldhb, Gstt3, Cbr1, Ftl1, Hba1, Tf, Selenbp2     |
| extracellular region part                | 11    | Fth1, Phb, Hspa5, Fabp3, Ldhb, Gstt3, Cbr1, Ftl1, Tf, Hba1, Selenbp2     |
| cell part                                | 11    | Fth1, Phb, Hspa5, Fabp3, Ldhb, Gstt3, Cbr1, Ftl1, Tf, Hba1, Selenbp2     |
| extracellular region                     | 11    | Fth1, Phb, Hspa5, Fabp3, Ldhb, Gstt3, Cbr1, Ftl1, Tf, Hba1, Selenbp2     |
| intracellular                            | 11    | Fth1, Phb, Hspa5, Fabp3, Ldhb, Gstt3, Cbr1, Ftl1, Tf, Hba1, Selenbp2     |
| extracellular organelle                  | 11    | Fth1, Phb, Hspa5, Fabp3, Ldhb, Gstt3, Cbr1, Ftl1, Tf, Hba1, Selenbp2     |
| cytoplasmic part                         | 11    | Fth1, Phb, Hspa5, Fabp3, Ldhb, Gstt3, Cbr1, Ftl1, Tf, Hba1, Tf, Selenbp2 |
| vesicle                                  | 11    | Fth1, Phb, Hspa5, Fabp3, Ldhb, Gstt3, Cbr1, Ftl1, Tf, Hba1, Selenbp2     |
| cell                                     | 11    | Fth1, Phb, Hspa5, Fabp3, Ldhb, Gstt3, Cbr1, Ftl1, Tf, Hba1, Selenbp2     |
| membrane-bounded organelle               | 11    | Fth1, Phb, Hspa5, Fabp3, Ldhb, Gstt3, Cbr1, Ftl1, Tf, Hba1, Selenbp2     |
| organelle                                | 11    | Fth1, Phb, Hspa5, Fabp3, Ldhb, Gstt3, Cbr1, Ftl1, Tf, Hba1, Selenbp2     |
| intracellular part                       | 11    | Fth1, Phb, Hspa5, Fabp3, Ldhb, Gstt3, Cbr1, Ftl1, Tf, Hba1, Selenbp2     |
| extracellular vesicle                    | 11    | Fth1, Phb, Hspa5, Fabp3, Ldhb, Gstt3, Cbr1, Ftl1, Tf, Hba1, Selenbp2     |
| cytoplasm                                | 11    | Fth1, Phb, Hspa5, Fabp3, Ldhb, Gstt3, Cbr1, Ftl1, Tf, Hba1, Tf, Selenbp2 |
| extracellular exosome                    | 11    | Fth1, Phb, Hspa5, Fabp3, Ldhb, Gstt3, Cbr1, Ftl1, Tf, Hba1, Selenbp2     |
| intracellular membrane-bounded organelle | 10    | Fth1, Phb, Hspa5, Fabp3, Ldhb, Gstt3, Cbr1, Ftl1, Tf, Selenbp2           |
| cytosol                                  | 8     | Fth1, Fabp3, Ldhb, Gstt3, Cbr1, Ftl1, Hba1, Selenbp2                     |
| organelle part                           | 8     | Phb, Hspa5, Fabp3, Cbr1, Ftl1, Hba1, Tf, Selenbp2                        |
| nucleus                                  | 8     | Fth1, Phb, Hspa5, Fabp3, Gstt3, Cbr1, Tf, Selenbp2                       |
| membrane                                 | 8     | Phb, Hspa5, Ldhb, Cbr1, Ftl1, Hba1, Tf, Selenbp2                         |
| intracellular organelle part             | 7     | Phb, Hspa5, Fabp3, Cbr1, Hba1, Tf, Selenbp2                              |
| membrane-enclosed lumen                  | 6     | Phb, Hspa5, Fabp3, Cbr1, Tf, Selenbp2                                    |
| extracellular space                      | 6     | Hspa5, Fabp3, Cbr1, Tf, Hba1, Selenbp2                                   |

Supplementary table S5 continued. Sequence distribution of cellular component (Filtered by #Seqs: cutoff= 5)

| GO-Terms                                     | #Seqs | Protein                               |
|----------------------------------------------|-------|---------------------------------------|
| organelle lumen                              | 6     | Phb, Hspa5, Fabp3, Cbr1, Tf, Selenbp2 |
| cell periphery                               | 6     | Phb, Hspa5, Fabp3, Cbr1, Ftl1, Tf     |
| intracellular organelle lumen                | 6     | Phb, Hspa5, Fabp3, Cbr1, Tf, Selenbp2 |
| protein complex                              | 6     | Fth1, Phb, Hspa5, Ftl1, Tf, Hba1      |
| macromolecular complex                       | 6     | Fth1, Phb, Hspa5, Ftl1, Hba1, Tf      |
| mitochondrion                                | 5     | Fth1, Phb, Hspa5, Ldhb, Fabp3         |
| plasma membrane                              | 5     | Phb, Hspa5, Cbr1, Ftl1, Tf            |
| membrane part                                | 5     | Phb, Hspa5, Ldhb, Ftl1, Tf            |
| nuclear part                                 | 5     | Phb, Hspa5, Fabp3, Cbr1, Selenbp2     |
| non-membrane-bounded organelle               | 5     | Phb, Hspa5, Fabp3, Hba1, Selenbp2     |
| intracellular non-membrane-bounded organelle | 5     | Phb, Hspa5, Fabp3, Hba1, Selenbp2     |
