# Supplementary material for: Aberrant Transferrin and Ferritin Upregulation Elicits Iron Accumulation and Oxidative Inflammaging Causing Ferroptosis and Undermines Estradiol Biosynthesis in Aging Rat Ovaries by Upregulating NF-Κb-Activated Inducible Nitric Oxide Synthase: First Demonstration of an Intricate Mechanism
Source: MDPI journal article supplement (doi:10.3390/ijms232012689), 2022-10-21
Supplement: s1 [file s1]

Supplementary table S4. Sequence distribution of biological process (Filtered by #Seqs: cutoff= 5)

| GO-Terms                                  | #Seqs | Protein                                                              |
|-------------------------------------------|-------|----------------------------------------------------------------------|
| single-organism process                   | 11    | Fth1, Phb, Hspa5, Ldhb, Fabp3, Gstt3, Cbr1, Ftl1, Hba1, Tf, Selenbp2 |
| cellular process                          | 11    | Fth1, Phb, Hspa5, Ldhb, Fabp3, Gstt3, Cbr1, Ftl1, Tf, Hba1, Selenbp2 |
| single-organism cellular process          | 11    | Fth1, Phb, Hspa5, Fabp3, Ldhb, Gstt3, Cbr1, Ftl1, Tf, Hba1, Selenbp2 |
| metabolic process                         | 9     | Fth1, Phb, Hspa5, Ldhb, Fabp3, Gstt3, Cbr1, Ftl1, Tf                 |
| single-organism developmental process     | 9     | Phb, Hspa5, Fabp3, Ldhb, Cbr1, Ftl1, Hba1, Tf, Selenbp2              |
| developmental process                     | 9     | Phb, Hspa5, Fabp3, Ldhb, Cbr1, Ftl1, Hba1, Tf, Selenbp2              |
| single-organism metabolic process         | 9     | Fth1, Phb, Hspa5, Ldhb, Fabp3, Gstt3, Cbr1, Ftl1, Tf                 |
| localization                              | 8     | Fth1, Phb, Hspa5, Fabp3, Ftl1, Tf, Hba1, Selenbp2                    |
| cell differentiation                      | 8     | Phb, Hspa5, Fabp3, Cbr1, Ftl1, Tf, Hba1, Selenbp2                    |
| transport                                 | 8     | Fth1, Phb, Hspa5, Fabp3, Ftl1, Tf, Hba1, Selenbp2                    |
| response to stimulus                      | 8     | Fth1, Phb, Hspa5, Fabp3, Gstt3, Cbr1, Tf, Hba1                       |
| multicellular organismal process          | 8     | Phb, Hspa5, Fabp3, Ldhb, Cbr1, Ftl1, Hba1, Tf                        |
| biological regulation                     | 8     | Fth1, Phb, Hspa5, Fabp3, Cbr1, Ftl1, Tf, Hba1                        |
| anatomical structure development          | 8     | Phb, Hspa5, Fabp3, Ldhb, Cbr1, Ftl1, Hba1, Tf                        |
| establishment of localization             | 8     | Fth1, Phb, Hspa5, Fabp3, Ftl1, Tf, Hba1, Selenbp2                    |
| cellular developmental process            | 8     | Phb, Hspa5, Fabp3, Cbr1, Ftl1, Tf, Hba1, Selenbp2                    |
| system development                        | 7     | Phb, Hspa5, Fabp3, Ldhb, Ftl1, Hba1, Tf                              |
| cellular biosynthetic process             | 7     | Phb, Hspa5, Fabp3, Ldhb, Gstt3, Cbr1, Tf                             |
| heterocycle metabolic process             | 7     | Phb, Hspa5, Ldhb, Fabp3, Gstt3, Cbr1, Tf                             |
| multicellular organism development        | 7     | Phb, Hspa5, Fabp3, Ldhb, Ftl1, Hba1, Tf                              |
| biosynthetic process                      | 7     | Phb, Hspa5, Fabp3, Ldhb, Gstt3, Cbr1, Tf                             |
| response to chemical                      | 7     | Phb, Hspa5, Fabp3, Gstt3, Cbr1, Hba1, Tf                             |
| organic substance metabolic process       | 7     | Phb, Hspa5, Ldhb, Fabp3, Gstt3, Cbr1, Tf                             |
| organic substance biosynthetic process    | 7     | Phb, Hspa5, Fabp3, Ldhb, Gstt3, Cbr1, Tf                             |
| single-organism localization              | 7     | Fth1, Phb, Hspa5, Fabp3, Ftl1, Hba1, Tf                              |
| single-multicellular organism process     | 7     | Phb, Hspa5, Fabp3, Ldhb, Ftl1, Hba1, Tf                              |
| response to stress                        | 7     | Phb, Hspa5, Fabp3, Gstt3, Cbr1, Tf, Hba1                             |
| animal organ development                  | 7     | Phb, Hspa5, Fabp3, Ldhb, Ftl1, Hba1, Tf                              |
| organic cyclic compound metabolic process | 7     | Phb, Hspa5, Ldhb, Fabp3, Gstt3, Cbr1, Tf                             |
| nitrogen compound metabolic process       | 7     | Phb, Hspa5, Ldhb, Fabp3, Gstt3, Cbr1, Tf                             |
| primary metabolic process                 | 7     | Phb, Hspa5, Ldhb, Fabp3, Gstt3, Cbr1, Tf                             |
| cellular metabolic process                | 7     | Phb, Hspa5, Ldhb, Fabp3, Gstt3, Cbr1, Tf                             |
| regulation of biological quality          | 7     | Fth1, Phb, Hspa5, Fabp3, Ftl1, Hba1, Tf                              |

Supplementary table S4 continued. Sequence distribution of biological process (Filtered by #Seqs: cutoff= 5)

| GO-Terms                                         | #Seqs | Protein                            |
|--------------------------------------------------|-------|------------------------------------|
| nucleobase-containing compound metabolic process | 6     | Phb, Hspa5, Ldhb, Fabp3, Gstt3, Tf |
| cellular nitrogen compound metabolic process     | 6     | Phb, Hspa5, Ldhb, Fabp3, Gstt3, Tf |
| regulation of cellular process                   | 6     | Fth1, Phb, Hspa5, Fabp3, Cbr1, Tf  |
| regulation of biological process                 | 6     | Fth1, Phb, Hspa5, Fabp3, Cbr1, Tf  |
| cellular aromatic compound metabolic process     | 6     | Phb, Hspa5, Ldhb, Fabp3, Gstt3, Tf |
| response to organic substance                    | 6     | Phb, Hspa5, Fabp3, Cbr1, Tf, Hba1  |
| phosphorylation                                  | 5     | Phb, Hspa5, Fabp3, Ldhb, Tf        |
| cellular response to stimulus                    | 5     | Phb, Hspa5, Fabp3, Gstt3, Tf       |
| phosphate-containing compound metabolic process  | 5     | Phb, Hspa5, Ldhb, Fabp3, Tf        |
| positive regulation of cellular process          | 5     | Fth1, Phb, Hspa5, Fabp3, Tf        |
| phosphorus metabolic process                     | 5     | Phb, Hspa5, Ldhb, Fabp3, Tf        |
| positive regulation of metabolic process         | 5     | Fth1, Phb, Hspa5, Fabp3, Tf        |
| organonitrogen compound metabolic process        | 5     | Phb, Ldhb, Fabp3, Gstt3, Cbr1      |
| macromolecule modification                       | 5     | Phb, Hspa5, Fabp3, Gstt3, Tf       |
| neurological system process                      | 5     | Phb, Fabp3, Cbr1, Ftl1, Tf         |
| organic substance catabolic process              | 5     | Phb, Hspa5, Ldhb, Fabp3, Cbr1      |
| cellular response to chemical stimulus           | 5     | Phb, Hspa5, Fabp3, Gstt3, Tf       |
| negative regulation of biological process        | 5     | Fth1, Phb, Hspa5, Fabp3, Tf        |
| macromolecule metabolic process                  | 5     | Phb, Hspa5, Fabp3, Gstt3, Tf       |
| regulation of molecular function                 | 5     | Fth1, Phb, Hspa5, Fabp3, Tf        |
| oxidation-reduction process                      | 5     | Fth1, Ldhb, Fabp3, Cbr1, Ftl1      |
| catabolic process                                | 5     | Phb, Hspa5, Ldhb, Fabp3, Cbr1      |
| negative regulation of cellular process          | 5     | Fth1, Phb, Hspa5, Fabp3, Tf        |
| cellular macromolecule metabolic process         | 5     | Phb, Hspa5, Fabp3, Gstt3, Tf       |
| organic cyclic compound biosynthetic process     | 5     | Phb, Hspa5, Fabp3, Cbr1, Tf        |
| positive regulation of biological process        | 5     | Fth1, Phb, Hspa5, Fabp3, Tf        |
| homeostatic process                              | 5     | Fth1, Fabp3, Ftl1, Tf, Hba1        |
| small molecule metabolic process                 | 5     | Phb, Hspa5, Ldhb, Fabp3, Cbr1      |
| heterocycle biosynthetic process                 | 5     | Phb, Hspa5, Fabp3, Cbr1, Tf        |
| macromolecule localization                       | 5     | Phb, Hspa5, Fabp3, Tf, Selenbp2    |
| regulation of metabolic process                  | 5     | Fth1, Phb, Hspa5, Fabp3, Tf        |
| nucleic acid metabolic process                   | 5     | Phb, Hspa5, Fabp3, Gstt3, Tf       |
| system process                                   | 5     | Phb, Fabp3, Cbr1, Ftl1, Tf         |
| cell development                                 | 5     | Phb, Hspa5, Ftl1, Tf, Hba1         |
