# Supplementary material for: Aberrant Transferrin and Ferritin Upregulation Elicits Iron Accumulation and Oxidative Inflammaging Causing Ferroptosis and Undermines Estradiol Biosynthesis in Aging Rat Ovaries by Upregulating NF-Κb-Activated Inducible Nitric Oxide Synthase: First Demonstration of an Intricate Mechanism
Source: MDPI journal article supplement (doi:10.3390/ijms232012689), 2022-10-21
Supplement: s1 [file supplementary table S1.xlsx]

## Sheet: Sheet1
supplementary table S1. annotation and mapping analysis of identified protein with blast2go software
Protein Name	Tags	SeqName	Description	Length	#Hits	e-Value	sim mean	#GO	GO IDs	GO Names	Enzyme Codes	Enzyme Name
1. Fth1 (Ferritin heavy chain)	BLASTED, MAPPED, ANNOTATED	sp|P19132|FRIH_RAT	FRIH_RAT ame: Full=Ferritin heavy chain Short=Ferritin H subunit Contains: ame: Full=Ferritin heavy N-terminally processed	182	20	3.11081e-135	94.75	17	P:GO:1904231; F:GO:0008199; C:GO:0008043; P:GO:1904234; P:GO:0008284; P:GO:0006880; F:GO:0004322; C:GO:0044754; C:GO:0005634; P:GO:0097286; C:GO:0070062; F:GO:0005515; P:GO:0006955; P:GO:0048147; C:GO:0005739; C:GO:0005829; P:GO:0055114	P:positive regulation of succinate dehydrogenase activity; F:ferric iron binding; C:intracellular ferritin complex; P:positive regulation of aconitate hydratase activity; P:positive regulation of cell proliferation; P:intracellular sequestering of iron ion; F:ferroxidase activity; C:autolysosome; C:nucleus; P:iron ion import; C:extracellular exosome; F:protein binding; P:immune response; P:negati…	EC:1.97.1; EC:1.16.3.1; EC:1.16.3	Other oxidoreductases; Ferroxidase; Oxidizing metal ions
2. Ftl1 (Ferritin light chain 1)	BLASTED, MAPPED, ANNOTATED	sp|P02793|FRIL1_RAT	FRIL1_RAT ame: Full=Ferritin light chain 1 ame: Full=Ferritin L subunit 1	183	20	3.75552e-132	85.05	14	F:GO:0042802; F:GO:0008199; C:GO:0008043; P:GO:0006880; F:GO:0004322; C:GO:0044754; P:GO:0007605; C:GO:0070062; P:GO:0048741; P:GO:0006826; C:GO:0005829; P:GO:0055114; C:GO:0060171; C:GO:0016324	F:identical protein binding; F:ferric iron binding; C:intracellular ferritin complex; P:intracellular sequestering of iron ion; F:ferroxidase activity; C:autolysosome; P:sensory perception of sound; C:extracellular exosome; P:skeletal muscle fiber development; P:iron ion transport; C:cytosol; P:oxidation-reduction process; C:stereocilium membrane; C:apical plasma membrane	EC:1.16.3.1; EC:1.16.3	Ferroxidase; Oxidizing metal ions
3. Tf(Transferrin)	BLASTED, MAPPED, ANNOTATED	sp|P12346|TRFE_RAT	TRFE_RAT ame: Full=Serotransferrin Short=Transferrin ame: Full=Beta-1 metal-binding globulin ame: Full=Liver regeneration-related LRRG03 ame: Full=Siderophilin Flags: Precursor	698	20	0	76.3	72	P:GO:0007015; P:GO:0007257; P:GO:0051092; P:GO:0071372; C:GO:0051286; F:GO:0004857; P:GO:0045893; C:GO:0005905; C:GO:0042581; P:GO:0033214; P:GO:2001205; C:GO:0031232; P:GO:0070447; P:GO:0033690; F:GO:0008199; P:GO:0034145; F:GO:0008198; P:GO:0007264; P:GO:0033572; P:GO:0032680; P:GO:0060395; P:GO:0045454; P:GO:1900229; P:GO:0097460; C:GO:0005634; C:GO:0097013; P:GO:0045780; F:GO:1990459; P:GO:00…	P:actin filament organization; P:activation of JUN kinase activity; P:positive regulation of NF-kappaB transcription factor activity; P:cellular response to follicle-stimulating hormone stimulus; C:cell tip; F:enzyme inhibitor activity; P:positive regulation of transcription, DNA-templated; C:clathrin-coated pit; C:specific granule; P:iron assimilation by chelation and transport; P:negative regul…	EC:3.4.21	Acting on peptide bonds (peptidases)
4. Fabp3(Fatty acid-binding protein)	BLASTED, MAPPED, ANNOTATED	sp|P07483|FABPH_RAT	FABPH_RAT ame: Full=Fatty acid-binding heart ame: Full=Fatty acid-binding 3 ame: Full=Heart-type fatty acid-binding Short=H-FABP	133	20	7.32037e-92	84.55	41	P:GO:0044539; C:GO:0016528; P:GO:0008285; P:GO:0008284; P:GO:0022008; P:GO:0042750; C:GO:0043025; C:GO:0042995; P:GO:0006469; P:GO:0042632; P:GO:0055091; C:GO:0005654; P:GO:0050872; P:GO:0050873; P:GO:0071073; C:GO:0070062; P:GO:0032868; P:GO:0050673; P:GO:0045892; P:GO:0046320; C:GO:0005829; P:GO:0070542; P:GO:0071356; P:GO:2001245; P:GO:0060134; P:GO:0021846; P:GO:0050729; F:GO:0005324; C:GO:00…	P:long-chain fatty acid import; C:sarcoplasm; P:negative regulation of cell proliferation; P:positive regulation of cell proliferation; P:neurogenesis; P:hibernation; C:neuronal cell body; C:cell projection; P:negative regulation of protein kinase activity; P:cholesterol homeostasis; P:phospholipid homeostasis; C:nucleoplasm; P:white fat cell differentiation; P:brown fat cell differentiation; P:p…
5. Ldhb (L-lactate dehydrogenase B chain)	BLASTED, MAPPED, ANNOTATED	sp|P42123|LDHB_RAT	LDHB_RAT ame: Full=L-lactate dehydrogenase B chain Short=LDH-B ame: Full=LDH heart subunit Short=LDH-H	334	20	0	94.8	17	P:GO:0006094; F:GO:0042802; C:GO:0043209; P:GO:0006096; P:GO:0006534; F:GO:0005212; P:GO:0007423; C:GO:0070062; F:GO:0004459; F:GO:0051287; C:GO:0005739; C:GO:0045121; P:GO:0019674; C:GO:0005829; P:GO:0019244; P:GO:0055114; F:GO:0019900	P:gluconeogenesis; F:identical protein binding; C:myelin sheath; P:glycolytic process; P:cysteine metabolic process; F:structural constituent of eye lens; P:sensory organ development; C:extracellular exosome; F:L-lactate dehydrogenase activity; F:NAD binding; C:mitochondrion; C:membrane raft; P:NAD metabolic process; C:cytosol; P:lactate biosynthetic process from pyruvate; P:oxidation-reduction p…	EC:1.1.1.27	L-lactate dehydrogenase
6. Hba1 (Hemoglobin subunit alpha-1/2)	BLASTED, MAPPED, ANNOTATED	sp|P01946|HBA_RAT	HBA_RAT ame: Full=Hemoglobin subunit alpha-1 2 ame: Full=Alpha-1 2-globin ame: Full=Hemoglobin alpha-1 2 chain	142	20	4.76684e-101	87.15	20	F:GO:0019825; C:GO:0043209; C:GO:0022627; P:GO:0015671; F:GO:0043177; P:GO:0048821; F:GO:0005344; F:GO:0020037; C:GO:0005833; F:GO:0004601; P:GO:0006979; C:GO:0070062; F:GO:0005506; P:GO:0001701; P:GO:0006804; C:GO:0016020; C:GO:0031838; C:GO:0072562; F:GO:0031720; P:GO:0035634	F:oxygen binding; C:myelin sheath; C:cytosolic small ribosomal subunit; P:oxygen transport; F:organic acid binding; P:erythrocyte development; F:oxygen transporter activity; F:heme binding; C:hemoglobin complex; F:peroxidase activity; P:response to oxidative stress; C:extracellular exosome; F:iron ion binding; P:in utero embryonic development; P:obsolete peroxidase reaction; C:membrane; C:haptogl…	EC:1.11.1.7	Peroxidase
7. Hspa5 (78 kDa glucose-regulated protein)	BLASTED, MAPPED, ANNOTATED	sp|P06761|GRP78_RAT	GRP78_RAT ame: Full=78 kDa glucose-regulated Short=GRP-78 ame: Full=Heat shock 70 kDa 5 ame: Full=Immunoglobulin heavy chain-binding Short= ame: Full=Steroidogenesis-activator polypeptide Flags: Precursor	654	20	0	92	67	F:GO:0016887; P:GO:0019915; C:GO:0005790; P:GO:0009792; C:GO:0005791; C:GO:0005793; C:GO:0005875; C:GO:0005788; P:GO:0021680; P:GO:0002119; F:GO:0005509; F:GO:0051087; P:GO:0031398; P:GO:0035437; F:GO:0001948; P:GO:0010976; C:GO:0034663; C:GO:0008180; P:GO:1903891; F:GO:0019904; P:GO:1903894; P:GO:0021589; P:GO:1903897; P:GO:1901998; C:GO:0005886; P:GO:0042149; F:GO:0031625; P:GO:0010906; C:GO:00…	F:ATPase activity; P:lipid storage; C:smooth endoplasmic reticulum; P:embryo development ending in birth or egg hatching; C:rough endoplasmic reticulum; C:endoplasmic reticulum-Golgi intermediate compartment; C:microtubule associated complex; C:endoplasmic reticulum lumen; P:cerebellar Purkinje cell layer development; P:nematode larval development; F:calcium ion binding; F:chaperone binding; P:po…	EC:3.6.1.3; EC:3.6.1.15	Adenosinetriphosphatase; Nucleoside-triphosphate phosphatase
8. Gstt3 (Glutathione S-transferase theta-3)	BLASTED, MAPPED, ANNOTATED	tr|D3Z8I7|D3Z8I7_RAT	GSTT3_MOUSE ame: Full=Glutathione S-transferase theta-3	210	20	5.84344e-80	70.8	15	P:GO:0018900; F:GO:0004364; P:GO:1901687; P:GO:0006304; C:GO:0005634; C:GO:0005777; P:GO:0006803; P:GO:0006979; C:GO:0070062; F:GO:0004602; F:GO:0047651; P:GO:0006749; P:GO:0006804; P:GO:0098869; C:GO:0005829	P:dichloromethane metabolic process; F:glutathione transferase activity; P:glutathione derivative biosynthetic process; P:DNA modification; C:nucleus; C:peroxisome; P:obsolete glutathione conjugation reaction; P:response to oxidative stress; C:extracellular exosome; F:glutathione peroxidase activity; F:alkylhalidase activity; P:glutathione metabolic process; P:obsolete peroxidase reaction; P:cell…	EC:2.5.1.18; EC:3.8.1.1; EC:1.11.1.9; EC:1.11.1.7	Glutathione transferase; Alkylhalidase; Glutathione peroxidase; Peroxidase
9. Cbr1 (Carbonyl reductase [NADPH] 1)	BLASTED, MAPPED, ANNOTATED	sp|P47727|CBR1_RAT	CBR1_RAT ame: Full=Carbonyl reductase [NADPH] 1 ame: Full=15-hydroxyprostaglandin dehydrogenase	277	20	0	68.95	33	P:GO:1901362; P:GO:0042376; F:GO:0004022; P:GO:1901566; C:GO:0005654; P:GO:0009628; P:GO:0006118; C:GO:0070062; P:GO:0050794; P:GO:0018130; P:GO:0050890; C:GO:0005902; P:GO:0046165; C:GO:0005829; F:GO:0070402; P:GO:0017144; P:GO:0016114; F:GO:0016655; F:GO:0004090; P:GO:0006691; P:GO:0009743; P:GO:0009820; C:GO:0005886; P:GO:0006950; P:GO:0030855; F:GO:0000253; F:GO:0047021; F:GO:0050221; C:GO:00…	P:organic cyclic compound biosynthetic process; P:phylloquinone catabolic process; F:alcohol dehydrogenase (NAD) activity; P:organonitrogen compound biosynthetic process; C:nucleoplasm; P:response to abiotic stimulus; P:obsolete electron transport; C:extracellular exosome; P:regulation of cellular process; P:heterocycle biosynthetic process; P:cognition; C:microvillus; P:alcohol biosynthetic proc…	EC:1.1.1.189; EC:1.1.1.197; EC:1.1.1.184; EC:1.1.1.1; EC:1.1.1.270	Prostaglandin-E(2) 9-reductase; 15-hydroxyprostaglandin dehydrogenase (NADP(+)); Carbonyl reductase (NADPH); Alcohol dehydrogenase; 3-beta-hydroxysteroid 3-dehydrogenase
10. Selenbp2 (Selenium-binding protein 2)	BLASTED, MAPPED, ANNOTATED	sp|Q8VIF7|SBP1_RAT	SBP1_RAT ame: Full=Selenium-binding 1 ame: Full=56 kDa selenium-binding Short=SBP56 Short=SP56 ame: Full=Selenium-binding 2	472	15	0	82.73	9	P:GO:0050873; C:GO:0005615; C:GO:0070062; F:GO:0005515; F:GO:0008430; C:GO:0016020; P:GO:0015031; C:GO:0005829; C:GO:0005730	P:brown fat cell differentiation; C:extracellular space; C:extracellular exosome; F:protein binding; F:selenium binding; C:membrane; P:protein transport; C:cytosol; C:nucleolus
11. Phb (Prohibitin)	BLASTED, MAPPED, ANNOTATED	sp|P67779|PHB_RAT	PHB_RAT ame: Full=Prohibitin	272	20	0	79.8	82	P:GO:0019915; P:GO:0060762; F:GO:0008022; P:GO:0002082; P:GO:0008340; P:GO:0009792; P:GO:0042177; C:GO:0005794; P:GO:0051091; P:GO:0001302; C:GO:0005875; P:GO:0060766; C:GO:0005747; C:GO:0009506; P:GO:0030308; P:GO:0045893; P:GO:0000060; F:GO:0031871; P:GO:0071897; P:GO:0071456; P:GO:0071731; F:GO:0033218; P:GO:0016575; C:GO:0031315; C:GO:0035632; P:GO:0030421; P:GO:0007062; F:GO:0042826; C:GO:00…	P:lipid storage; P:regulation of branching involved in mammary gland duct morphogenesis; F:protein C-terminus binding; P:regulation of oxidative phosphorylation; P:determination of adult lifespan; P:embryo development ending in birth or egg hatching; P:negative regulation of protein catabolic process; C:Golgi apparatus; P:positive regulation of sequence-specific DNA binding transcription factor a…
