# Supplementary material for: Aberrant Transferrin and Ferritin Upregulation Elicits Iron Accumulation and Oxidative Inflammaging Causing Ferroptosis and Undermines Estradiol Biosynthesis in Aging Rat Ovaries by Upregulating NF-Κb-Activated Inducible Nitric Oxide Synthase: First Demonstration of an Intricate Mechanism
Source: MDPI journal article supplement (doi:10.3390/ijms232012689), 2022-10-21
Supplement: s1 [file Supplementary table S2.xlsx]

## Sheet: Sheet1
Supplementary table S2. Interpro analysis of identified protein with blast2go software
Protein Name	Tags	SeqName	Length	#GO	GO IDs	GO Names	InterPro IDs	InterPro GO IDs	InterPro GO Names
1. Fth1 (Ferritin heavy chain)	INTERPRO, ANNOTATED	P19132	182	3	P:GO:0006879; F:GO:0008199; P:GO:0006826	P:cellular iron ion homeostasis; F:ferric iron binding; P:iron ion transport	IPR012347 (G3DSA:1.20.1260.GENE3D); IPR008331 (PFAM); IPR001519 (PANTHER); PTHR11431:SF53 (PANTHER); IPR009040 (PROSITE_PROFILES); cd01056 (CDD); IPR009078 (SUPERFAMILY)	P:GO:0006879; F:GO:0008199; P:GO:0006826	P:cellular iron ion homeostasis; F:ferric iron binding; P:iron ion transport
2. Ftl1 (Ferritin light chain 1)	INTERPRO, ANNOTATED	P02793	183	3	P:GO:0006879; F:GO:0008199; P:GO:0006826	P:cellular iron ion homeostasis; F:ferric iron binding; P:iron ion transport	IPR008331 (PFAM); IPR012347 (G3DSA:1.20.1260.GENE3D); IPR001519 (PANTHER); PTHR11431:SF66 (PANTHER); IPR009040 (PROSITE_PROFILES); cd00904 (CDD); IPR009078 (SUPERFAMILY)	P:GO:0006879; F:GO:0008199; P:GO:0006826	P:cellular iron ion homeostasis; F:ferric iron binding; P:iron ion transport
3. Tf(Transferrin)	INTERPRO, ANNOTATED	P12346	698	5	P:GO:0006879; C:GO:0005615; F:GO:0008199; P:GO:0015682; F:GO:0015091	P:cellular iron ion homeostasis; C:extracellular space; F:ferric iron binding; P:ferric iron transport; F:ferric iron transmembrane transporter activity	IPR001156 (PRINTS); IPR001156 (SMART); IPR016357 (PIRSF); IPR030685 (PIRSF); G3DSA:3.40.190.10 (GENE3D); IPR001156 (PFAM); G3DSA:3.40.190.10 (GENE3D); PTHR11485 (PANTHER); PTHR11485:SF35 (PANTHER); IPR001156 (PROSITE_PROFILES); cd13618 (CDD); cd13617 (CDD); SSF53850 (SUPERFAMILY); SSF53850 (SUPERFAMILY)	P:GO:0006879; C:GO:0005615; F:GO:0008199; P:GO:0006826; F:GO:0015091	P:cellular iron ion homeostasis; C:extracellular space; F:ferric iron binding; P:iron ion transport; F:ferric iron transmembrane transporter activity
4. Fabp3(Fatty acid-binding protein)	INTERPRO, ANNOTATED	P07483	133	3	F:GO:0008289; P:GO:0006810; F:GO:0005215	F:lipid binding; P:transport; F:transporter activity	IPR000463 (PRINTS); IPR000566 (PFAM); IPR012674 (G3DSA:2.40.128.GENE3D); PTHR11955:SF125 (PANTHER); IPR031259 (PANTHER); IPR012674 (SUPERFAMILY)	F:GO:0008289; P:GO:0006810; F:GO:0005215	F:lipid binding; P:transport; F:transporter activity
5. Ldhb (L-lactate dehydrogenase B chain)	INTERPRO, ANNOTATED	P42123	334	6	P:GO:0006094; F:GO:0004459; C:GO:0005737; P:GO:0006096; P:GO:0055114; P:GO:0006534	P:gluconeogenesis; F:L-lactate dehydrogenase activity; C:cytoplasm; P:glycolytic process; P:oxidation-reduction process; P:cysteine metabolic process	IPR001557 (PRINTS); IPR001236 (PFAM); IPR001557 (PIRSF); G3DSA:3.40.50.720 (GENE3D); G3DSA:3.90.110.10 (GENE3D); IPR022383 (PFAM); IPR011304 (TIGRFAM); PTHR43128:SF5 (PANTHER); PTHR43128 (PANTHER); IPR011304 (HAMAP); cd05293 (CDD); IPR015955 (SUPERFAMILY); IPR016040 (SUPERFAMILY)	P:GO:0005975; F:GO:0004459; F:GO:0016616; F:GO:0016491; C:GO:0005737; F:GO:0003824; P:GO:0055114; P:GO:0019752	P:carbohydrate metabolic process; F:L-lactate dehydrogenase activity; F:oxidoreductase activity, acting on the CH-OH group of donors, NAD or NADP as acceptor; F:oxidoreductase activity; C:cytoplasm; F:catalytic activity; P:oxidation-reduction process; P:carboxylic acid metabolic process
6. Hba1 (Hemoglobin subunit alpha-1/2)	INTERPRO, ANNOTATED	P01946	142	5	C:GO:0005833; F:GO:0019825; F:GO:0005506; P:GO:0015671; F:GO:0020037	C:hemoglobin complex; F:oxygen binding; F:iron ion binding; P:oxygen transport; F:heme binding	IPR002339 (PRINTS); IPR002338 (PRINTS); G3DSA:1.10.490.10 (GENE3D); IPR000971 (PFAM); PTHR11442:SF61 (PANTHER); PTHR11442 (PANTHER); IPR000971 (PROSITE_PROFILES); IPR002338 (CDD); IPR009050 (SUPERFAMILY)	F:GO:0019825; C:GO:0005833; F:GO:0005506; P:GO:0015671; F:GO:0020037	F:oxygen binding; C:hemoglobin complex; F:iron ion binding; P:oxygen transport; F:heme binding
11. Hspa5 (78 kDa glucose-regulated protein)	INTERPRO	P06761	654				IPR013126 (PRINTS); G3DSA:3.30.420.40 (GENE3D); IPR029048 (G3DSA:1.20.1270.GENE3D); G3DSA:3.90.640.10 (GENE3D); G3DSA:3.30.420.40 (GENE3D); IPR013126 (PFAM); IPR029047 (G3DSA:2.60.34.GENE3D); mobidb-lite (MOBIDB_LITE); PTHR19375 (PANTHER); PTHR19375:SF244 (PANTHER); cd10241 (CDD); IPR029048 (SUPERFAMILY); IPR029047 (SUPERFAMILY); SSF53067 (SUPERFAMILY); SSF53067 (SUPERFAMILY)	no GO terms	no GO terms
14. Gstt3 (Glutathione S-transferase theta-3)	INTERPRO, ANNOTATED	D3Z8I7	210	1	F:GO:0005515	F:protein binding	IPR004045 (PFAM); G3DSA:1.20.1050.10 (GENE3D); G3DSA:3.40.30.10 (GENE3D); mobidb-lite (MOBIDB_LITE); PTHR11260 (PANTHER); PTHR11260:SF466 (PANTHER); IPR004045 (PROSITE_PROFILES); cd03050 (CDD); IPR010987 (SUPERFAMILY); IPR012336 (SUPERFAMILY)	F:GO:0005515	F:protein binding
15. Cbr1 (Carbonyl reductase [NADPH] 1)	INTERPRO	P47727	277				IPR002347 (PRINTS); IPR002347 (PRINTS); IPR002347 (PFAM); G3DSA:3.40.50.720 (GENE3D); mobidb-lite (MOBIDB_LITE); PTHR43490 (PANTHER); PTHR43490:SF35 (PANTHER); cd05324 (CDD); IPR016040 (SUPERFAMILY)	no GO terms	no GO terms
16. Selenbp2 (Selenium-binding protein 2)	INTERPRO, ANNOTATED	Q8VIF7	472	1	F:GO:0008430	F:selenium binding	IPR008826 (PFAM); IPR011042 (G3DSA:2.120.10.GENE3D); PTHR23300:SF5 (PANTHER); IPR008826 (PANTHER); SSF75011 (SUPERFAMILY)	F:GO:0008430	F:selenium binding
17. Phb (Prohibitin)	INTERPRO, ANNOTATED	P67779	272	1	C:GO:0016020	C:membrane	IPR000163 (PRINTS); IPR001107 (SMART); IPR001107 (PFAM); IPR000163 (PANTHER); PTHR23222:SF5 (PANTHER); IPR000163 (CDD); IPR001107 (SUPERFAMILY)	C:GO:0016020	C:membrane
