# Supplementary material for: Aberrant Transferrin and Ferritin Upregulation Elicits Iron Accumulation and Oxidative Inflammaging Causing Ferroptosis and Undermines Estradiol Biosynthesis in Aging Rat Ovaries by Upregulating NF-Κb-Activated Inducible Nitric Oxide Synthase: First Demonstration of an Intricate Mechanism
Source: MDPI journal article supplement (doi:10.3390/ijms232012689), 2022-10-21
Supplement: s1 [file supplementary table S3.xlsx]

## Sheet: Biological process
GO Distribution by Level (2)
GO-id	GO-term	#Seqs	Seqs
GO:0009987	cellular process	11	sp|P19132|FRIH_RAT, sp|P67779|PHB_RAT, sp|P06761|GRP78_RAT, sp|P42123|LDHB_RAT, sp|P07483|FABPH_RAT, tr|D3Z8I7|D3Z8I7_RAT, sp|P47727|CBR1_RAT, sp|P02793|FRIL1_RAT, sp|P12346|TRFE_RAT, sp|P01946|HBA_RAT, sp|Q8VIF7|SBP1_RAT
GO:0044699	single-organism process	11	sp|P19132|FRIH_RAT, sp|P67779|PHB_RAT, sp|P06761|GRP78_RAT, sp|P42123|LDHB_RAT, sp|P07483|FABPH_RAT, tr|D3Z8I7|D3Z8I7_RAT, sp|P47727|CBR1_RAT, sp|P02793|FRIL1_RAT, sp|P12346|TRFE_RAT, sp|P01946|HBA_RAT, sp|Q8VIF7|SBP1_RAT
GO:0032502	developmental process	9	sp|P67779|PHB_RAT, sp|P06761|GRP78_RAT, sp|P42123|LDHB_RAT, sp|P07483|FABPH_RAT, sp|P47727|CBR1_RAT, sp|P02793|FRIL1_RAT, sp|P12346|TRFE_RAT, sp|P01946|HBA_RAT, sp|Q8VIF7|SBP1_RAT
GO:0008152	metabolic process	9	sp|P19132|FRIH_RAT, sp|P67779|PHB_RAT, sp|P06761|GRP78_RAT, sp|P42123|LDHB_RAT, sp|P07483|FABPH_RAT, tr|D3Z8I7|D3Z8I7_RAT, sp|P47727|CBR1_RAT, sp|P02793|FRIL1_RAT, sp|P12346|TRFE_RAT
GO:0051179	localization	8	sp|P19132|FRIH_RAT, sp|P67779|PHB_RAT, sp|P06761|GRP78_RAT, sp|P07483|FABPH_RAT, sp|P02793|FRIL1_RAT, sp|P12346|TRFE_RAT, sp|P01946|HBA_RAT, sp|Q8VIF7|SBP1_RAT
GO:0065007	biological regulation	8	sp|P19132|FRIH_RAT, sp|P67779|PHB_RAT, sp|P06761|GRP78_RAT, sp|P07483|FABPH_RAT, sp|P47727|CBR1_RAT, sp|P02793|FRIL1_RAT, sp|P12346|TRFE_RAT, sp|P01946|HBA_RAT
GO:0050896	response to stimulus	8	sp|P19132|FRIH_RAT, sp|P67779|PHB_RAT, sp|P06761|GRP78_RAT, sp|P07483|FABPH_RAT, tr|D3Z8I7|D3Z8I7_RAT, sp|P47727|CBR1_RAT, sp|P12346|TRFE_RAT, sp|P01946|HBA_RAT
GO:0032501	multicellular organismal process	8	sp|P67779|PHB_RAT, sp|P06761|GRP78_RAT, sp|P42123|LDHB_RAT, sp|P07483|FABPH_RAT, sp|P47727|CBR1_RAT, sp|P02793|FRIL1_RAT, sp|P12346|TRFE_RAT, sp|P01946|HBA_RAT
GO:0050789	regulation of biological process	6	sp|P19132|FRIH_RAT, sp|P67779|PHB_RAT, sp|P06761|GRP78_RAT, sp|P07483|FABPH_RAT, sp|P47727|CBR1_RAT, sp|P12346|TRFE_RAT
GO:0048519	negative regulation of biological process	5	sp|P19132|FRIH_RAT, sp|P67779|PHB_RAT, sp|P06761|GRP78_RAT, sp|P07483|FABPH_RAT, sp|P12346|TRFE_RAT
GO:0048518	positive regulation of biological process	5	sp|P19132|FRIH_RAT, sp|P67779|PHB_RAT, sp|P06761|GRP78_RAT, sp|P07483|FABPH_RAT, sp|P12346|TRFE_RAT
GO:0002376	immune system process	4	sp|P19132|FRIH_RAT, sp|P67779|PHB_RAT, sp|P12346|TRFE_RAT, sp|P01946|HBA_RAT
GO:0071840	cellular component organization or biogenesis	3	sp|P67779|PHB_RAT, sp|P06761|GRP78_RAT, sp|P12346|TRFE_RAT
GO:0023052	signaling	3	sp|P67779|PHB_RAT, sp|P06761|GRP78_RAT, sp|P12346|TRFE_RAT
GO:0051704	multi-organism process	3	sp|P67779|PHB_RAT, sp|P06761|GRP78_RAT, sp|P12346|TRFE_RAT
GO:0040011	locomotion	2	sp|P06761|GRP78_RAT, sp|P12346|TRFE_RAT
GO:0022610	biological adhesion	2	sp|P06761|GRP78_RAT, sp|P12346|TRFE_RAT
GO:0022414	reproductive process	2	sp|P67779|PHB_RAT, sp|P06761|GRP78_RAT
GO:0000003	reproduction	2	sp|P67779|PHB_RAT, sp|P06761|GRP78_RAT
GO:0040007	growth	1	sp|P67779|PHB_RAT
GO:0098754	detoxification	1	tr|D3Z8I7|D3Z8I7_RAT
GO:0007610	behavior	1	sp|P67779|PHB_RAT
GO Distribution by Level (3)
GO-id	GO-term	#Seqs	Seqs
GO:0044763	single-organism cellular process	11	sp|P19132|FRIH_RAT, sp|P67779|PHB_RAT, sp|P06761|GRP78_RAT, sp|P42123|LDHB_RAT, sp|P07483|FABPH_RAT, tr|D3Z8I7|D3Z8I7_RAT, sp|P47727|CBR1_RAT, sp|P02793|FRIL1_RAT, sp|P12346|TRFE_RAT, sp|P01946|HBA_RAT, sp|Q8VIF7|SBP1_RAT
GO:0044767	single-organism developmental process	9	sp|P67779|PHB_RAT, sp|P06761|GRP78_RAT, sp|P42123|LDHB_RAT, sp|P07483|FABPH_RAT, sp|P47727|CBR1_RAT, sp|P02793|FRIL1_RAT, sp|P01946|HBA_RAT, sp|P12346|TRFE_RAT, sp|Q8VIF7|SBP1_RAT
GO:0044710	single-organism metabolic process	9	sp|P19132|FRIH_RAT, sp|P67779|PHB_RAT, sp|P06761|GRP78_RAT, sp|P42123|LDHB_RAT, sp|P07483|FABPH_RAT, tr|D3Z8I7|D3Z8I7_RAT, sp|P47727|CBR1_RAT, sp|P02793|FRIL1_RAT, sp|P12346|TRFE_RAT
GO:0051234	establishment of localization	8	sp|P19132|FRIH_RAT, sp|P67779|PHB_RAT, sp|P06761|GRP78_RAT, sp|P07483|FABPH_RAT, sp|P02793|FRIL1_RAT, sp|P12346|TRFE_RAT, sp|P01946|HBA_RAT, sp|Q8VIF7|SBP1_RAT
GO:0048856	anatomical structure development	8	sp|P67779|PHB_RAT, sp|P06761|GRP78_RAT, sp|P42123|LDHB_RAT, sp|P07483|FABPH_RAT, sp|P47727|CBR1_RAT, sp|P02793|FRIL1_RAT, sp|P01946|HBA_RAT, sp|P12346|TRFE_RAT
GO:0044707	single-multicellular organism process	7	sp|P67779|PHB_RAT, sp|P06761|GRP78_RAT, sp|P42123|LDHB_RAT, sp|P07483|FABPH_RAT, sp|P02793|FRIL1_RAT, sp|P01946|HBA_RAT, sp|P12346|TRFE_RAT
GO:0006807	nitrogen compound metabolic process	7	sp|P67779|PHB_RAT, sp|P06761|GRP78_RAT, sp|P42123|LDHB_RAT, sp|P07483|FABPH_RAT, tr|D3Z8I7|D3Z8I7_RAT, sp|P47727|CBR1_RAT, sp|P12346|TRFE_RAT
GO:0065008	regulation of biological quality	7	sp|P19132|FRIH_RAT, sp|P67779|PHB_RAT, sp|P06761|GRP78_RAT, sp|P07483|FABPH_RAT, sp|P02793|FRIL1_RAT, sp|P12346|TRFE_RAT, sp|P01946|HBA_RAT
GO:0071704	organic substance metabolic process	7	sp|P67779|PHB_RAT, sp|P06761|GRP78_RAT, sp|P42123|LDHB_RAT, sp|P07483|FABPH_RAT, tr|D3Z8I7|D3Z8I7_RAT, sp|P47727|CBR1_RAT, sp|P12346|TRFE_RAT
GO:0006950	response to stress	7	sp|P67779|PHB_RAT, sp|P06761|GRP78_RAT, sp|P07483|FABPH_RAT, tr|D3Z8I7|D3Z8I7_RAT, sp|P47727|CBR1_RAT, sp|P12346|TRFE_RAT, sp|P01946|HBA_RAT
GO:0044237	cellular metabolic process	7	sp|P67779|PHB_RAT, sp|P06761|GRP78_RAT, sp|P42123|LDHB_RAT, sp|P07483|FABPH_RAT, tr|D3Z8I7|D3Z8I7_RAT, sp|P47727|CBR1_RAT, sp|P12346|TRFE_RAT
GO:0044238	primary metabolic process	7	sp|P67779|PHB_RAT, sp|P06761|GRP78_RAT, sp|P07483|FABPH_RAT, sp|P42123|LDHB_RAT, tr|D3Z8I7|D3Z8I7_RAT, sp|P47727|CBR1_RAT, sp|P12346|TRFE_RAT
GO:0009058	biosynthetic process	7	sp|P67779|PHB_RAT, sp|P06761|GRP78_RAT, sp|P07483|FABPH_RAT, sp|P42123|LDHB_RAT, tr|D3Z8I7|D3Z8I7_RAT, sp|P47727|CBR1_RAT, sp|P12346|TRFE_RAT
GO:1902578	single-organism localization	7	sp|P19132|FRIH_RAT, sp|P67779|PHB_RAT, sp|P06761|GRP78_RAT, sp|P07483|FABPH_RAT, sp|P02793|FRIL1_RAT, sp|P12346|TRFE_RAT, sp|P01946|HBA_RAT
GO:0042221	response to chemical	7	sp|P67779|PHB_RAT, sp|P06761|GRP78_RAT, sp|P07483|FABPH_RAT, tr|D3Z8I7|D3Z8I7_RAT, sp|P47727|CBR1_RAT, sp|P12346|TRFE_RAT, sp|P01946|HBA_RAT
GO:0050794	regulation of cellular process	6	sp|P19132|FRIH_RAT, sp|P67779|PHB_RAT, sp|P06761|GRP78_RAT, sp|P07483|FABPH_RAT, sp|P47727|CBR1_RAT, sp|P12346|TRFE_RAT
GO:0033036	macromolecule localization	5	sp|P67779|PHB_RAT, sp|P06761|GRP78_RAT, sp|P07483|FABPH_RAT, sp|P12346|TRFE_RAT, sp|Q8VIF7|SBP1_RAT
GO:0019222	regulation of metabolic process	5	sp|P19132|FRIH_RAT, sp|P67779|PHB_RAT, sp|P06761|GRP78_RAT, sp|P07483|FABPH_RAT, sp|P12346|TRFE_RAT
GO:0009056	catabolic process	5	sp|P67779|PHB_RAT, sp|P06761|GRP78_RAT, sp|P42123|LDHB_RAT, sp|P07483|FABPH_RAT, sp|P47727|CBR1_RAT
GO:0048523	negative regulation of cellular process	5	sp|P19132|FRIH_RAT, sp|P67779|PHB_RAT, sp|P06761|GRP78_RAT, sp|P07483|FABPH_RAT, sp|P12346|TRFE_RAT
GO:0003008	system process	5	sp|P67779|PHB_RAT, sp|P07483|FABPH_RAT, sp|P47727|CBR1_RAT, sp|P02793|FRIL1_RAT, sp|P12346|TRFE_RAT
GO:0065009	regulation of molecular function	5	sp|P19132|FRIH_RAT, sp|P67779|PHB_RAT, sp|P06761|GRP78_RAT, sp|P07483|FABPH_RAT, sp|P12346|TRFE_RAT
GO:0048522	positive regulation of cellular process	5	sp|P19132|FRIH_RAT, sp|P67779|PHB_RAT, sp|P06761|GRP78_RAT, sp|P07483|FABPH_RAT, sp|P12346|TRFE_RAT
GO:0051716	cellular response to stimulus	5	sp|P67779|PHB_RAT, sp|P06761|GRP78_RAT, sp|P07483|FABPH_RAT, tr|D3Z8I7|D3Z8I7_RAT, sp|P12346|TRFE_RAT
GO:0009893	positive regulation of metabolic process	5	sp|P19132|FRIH_RAT, sp|P67779|PHB_RAT, sp|P06761|GRP78_RAT, sp|P07483|FABPH_RAT, sp|P12346|TRFE_RAT
GO:0048585	negative regulation of response to stimulus	4	sp|P67779|PHB_RAT, sp|P06761|GRP78_RAT, sp|P07483|FABPH_RAT, sp|P12346|TRFE_RAT
GO:0051235	maintenance of location	4	sp|P19132|FRIH_RAT, sp|P67779|PHB_RAT, sp|P06761|GRP78_RAT, sp|P02793|FRIL1_RAT
GO:0048583	regulation of response to stimulus	4	sp|P67779|PHB_RAT, sp|P06761|GRP78_RAT, sp|P07483|FABPH_RAT, sp|P12346|TRFE_RAT
GO:0009605	response to external stimulus	4	sp|P67779|PHB_RAT, sp|P06761|GRP78_RAT, sp|P07483|FABPH_RAT, sp|P12346|TRFE_RAT
GO:0008283	cell proliferation	4	sp|P19132|FRIH_RAT, sp|P67779|PHB_RAT, sp|P07483|FABPH_RAT, sp|P12346|TRFE_RAT
GO:0051641	cellular localization	4	sp|P19132|FRIH_RAT, sp|P67779|PHB_RAT, sp|P06761|GRP78_RAT, sp|P02793|FRIL1_RAT
GO:0009719	response to endogenous stimulus	4	sp|P67779|PHB_RAT, sp|P06761|GRP78_RAT, sp|P07483|FABPH_RAT, sp|P12346|TRFE_RAT
GO:0023051	regulation of signaling	3	sp|P67779|PHB_RAT, sp|P06761|GRP78_RAT, sp|P12346|TRFE_RAT
GO:0051239	regulation of multicellular organismal process	3	sp|P67779|PHB_RAT, sp|P06761|GRP78_RAT, sp|P12346|TRFE_RAT
GO:0007154	cell communication	3	sp|P67779|PHB_RAT, sp|P06761|GRP78_RAT, sp|P12346|TRFE_RAT
GO:0051094	positive regulation of developmental process	3	sp|P67779|PHB_RAT, sp|P06761|GRP78_RAT, sp|P12346|TRFE_RAT
GO:0007165	signal transduction	3	sp|P67779|PHB_RAT, sp|P06761|GRP78_RAT, sp|P12346|TRFE_RAT
GO:0009653	anatomical structure morphogenesis	3	sp|P67779|PHB_RAT, sp|P06761|GRP78_RAT, sp|P12346|TRFE_RAT
GO:0016043	cellular component organization	3	sp|P67779|PHB_RAT, sp|P06761|GRP78_RAT, sp|P12346|TRFE_RAT
GO:0006955	immune response	3	sp|P19132|FRIH_RAT, sp|P67779|PHB_RAT, sp|P12346|TRFE_RAT
GO:0048584	positive regulation of response to stimulus	3	sp|P67779|PHB_RAT, sp|P07483|FABPH_RAT, sp|P12346|TRFE_RAT
GO:0009892	negative regulation of metabolic process	3	sp|P67779|PHB_RAT, sp|P06761|GRP78_RAT, sp|P07483|FABPH_RAT
GO:0023057	negative regulation of signaling	3	sp|P67779|PHB_RAT, sp|P06761|GRP78_RAT, sp|P12346|TRFE_RAT
GO:0050793	regulation of developmental process	3	sp|P67779|PHB_RAT, sp|P06761|GRP78_RAT, sp|P12346|TRFE_RAT
GO:0051240	positive regulation of multicellular organismal process	3	sp|P67779|PHB_RAT, sp|P06761|GRP78_RAT, sp|P12346|TRFE_RAT
GO:0044700	single organism signaling	3	sp|P67779|PHB_RAT, sp|P06761|GRP78_RAT, sp|P12346|TRFE_RAT
GO:0051093	negative regulation of developmental process	2	sp|P67779|PHB_RAT, sp|P12346|TRFE_RAT
GO:0044702	single organism reproductive process	2	sp|P67779|PHB_RAT, sp|P06761|GRP78_RAT
GO:0051091	positive regulation of sequence-specific DNA binding transcription factor activity	2	sp|P67779|PHB_RAT, sp|P12346|TRFE_RAT
GO:0019953	sexual reproduction	2	sp|P67779|PHB_RAT, sp|P06761|GRP78_RAT
GO:0006457	protein folding	2	sp|P67779|PHB_RAT, sp|P06761|GRP78_RAT
GO:0048870	cell motility	2	sp|P06761|GRP78_RAT, sp|P12346|TRFE_RAT
GO:0002684	positive regulation of immune system process	2	sp|P67779|PHB_RAT, sp|P12346|TRFE_RAT
GO:0002682	regulation of immune system process	2	sp|P67779|PHB_RAT, sp|P12346|TRFE_RAT
GO:0048609	multicellular organismal reproductive process	2	sp|P67779|PHB_RAT, sp|P06761|GRP78_RAT
GO:0009607	response to biotic stimulus	2	sp|P06761|GRP78_RAT, sp|P12346|TRFE_RAT
GO:0044703	multi-organism reproductive process	2	sp|P67779|PHB_RAT, sp|P06761|GRP78_RAT
GO:0032504	multicellular organism reproduction	2	sp|P67779|PHB_RAT, sp|P06761|GRP78_RAT
GO:0051674	localization of cell	2	sp|P06761|GRP78_RAT, sp|P12346|TRFE_RAT
GO:0002253	activation of immune response	2	sp|P67779|PHB_RAT, sp|P12346|TRFE_RAT
GO:0032879	regulation of localization	2	sp|P06761|GRP78_RAT, sp|P12346|TRFE_RAT
GO:0003006	developmental process involved in reproduction	2	sp|P67779|PHB_RAT, sp|P06761|GRP78_RAT
GO:0009628	response to abiotic stimulus	2	sp|P67779|PHB_RAT, sp|P47727|CBR1_RAT
GO:0051241	negative regulation of multicellular organismal process	2	sp|P67779|PHB_RAT, sp|P12346|TRFE_RAT
GO:0023056	positive regulation of signaling	2	sp|P67779|PHB_RAT, sp|P12346|TRFE_RAT
GO:0040017	positive regulation of locomotion	2	sp|P06761|GRP78_RAT, sp|P12346|TRFE_RAT
GO:0022402	cell cycle process	2	sp|P67779|PHB_RAT, sp|P06761|GRP78_RAT
GO:0002520	immune system development	2	sp|P01946|HBA_RAT, sp|P12346|TRFE_RAT
GO:0040012	regulation of locomotion	2	sp|P06761|GRP78_RAT, sp|P12346|TRFE_RAT
GO:0016049	cell growth	1	sp|P67779|PHB_RAT
GO:0022611	dormancy process	1	sp|P07483|FABPH_RAT
GO:0043901	negative regulation of multi-organism process	1	sp|P12346|TRFE_RAT
GO:0050795	regulation of behavior	1	sp|P67779|PHB_RAT
GO:0044764	multi-organism cellular process	1	sp|P12346|TRFE_RAT
GO:1990748	cellular detoxification	1	tr|D3Z8I7|D3Z8I7_RAT
GO:0007017	microtubule-based process	1	sp|P06761|GRP78_RAT
GO:0072376	protein activation cascade	1	sp|P67779|PHB_RAT
GO:0032846	positive regulation of homeostatic process	1	sp|P12346|TRFE_RAT
GO:0002683	negative regulation of immune system process	1	sp|P12346|TRFE_RAT
GO:0045926	negative regulation of growth	1	sp|P67779|PHB_RAT
GO:0032844	regulation of homeostatic process	1	sp|P12346|TRFE_RAT
GO:0044406	adhesion of symbiont to host	1	sp|P12346|TRFE_RAT
GO:0035821	modification of morphology or physiology of other organism	1	sp|P12346|TRFE_RAT
GO:0002252	immune effector process	1	sp|P67779|PHB_RAT
GO:0048589	developmental growth	1	sp|P67779|PHB_RAT
GO:0007631	feeding behavior	1	sp|P67779|PHB_RAT
GO:0040008	regulation of growth	1	sp|P67779|PHB_RAT
GO:0045927	positive regulation of growth	1	sp|P67779|PHB_RAT
GO:0051050	positive regulation of transport	1	sp|P12346|TRFE_RAT
GO:0002262	myeloid cell homeostasis	1	sp|P01946|HBA_RAT
GO:0007155	cell adhesion	1	sp|P06761|GRP78_RAT
GO:0044419	interspecies interaction between organisms	1	sp|P12346|TRFE_RAT
GO:0043433	negative regulation of sequence-specific DNA binding transcription factor activity	1	sp|P67779|PHB_RAT
GO:0043900	regulation of multi-organism process	1	sp|P12346|TRFE_RAT
GO Distribution by Level (4)
GO-id	GO-term	#Seqs	Seqs
GO:0048869	cellular developmental process	8	sp|P67779|PHB_RAT, sp|P06761|GRP78_RAT, sp|P07483|FABPH_RAT, sp|P47727|CBR1_RAT, sp|P02793|FRIL1_RAT, sp|P12346|TRFE_RAT, sp|P01946|HBA_RAT, sp|Q8VIF7|SBP1_RAT
GO:0006810	transport	8	sp|P19132|FRIH_RAT, sp|P67779|PHB_RAT, sp|P06761|GRP78_RAT, sp|P07483|FABPH_RAT, sp|P02793|FRIL1_RAT, sp|P12346|TRFE_RAT, sp|P01946|HBA_RAT, sp|Q8VIF7|SBP1_RAT
GO:0048731	system development	7	sp|P67779|PHB_RAT, sp|P06761|GRP78_RAT, sp|P07483|FABPH_RAT, sp|P42123|LDHB_RAT, sp|P02793|FRIL1_RAT, sp|P12346|TRFE_RAT, sp|P01946|HBA_RAT
GO:0044249	cellular biosynthetic process	7	sp|P67779|PHB_RAT, sp|P06761|GRP78_RAT, sp|P07483|FABPH_RAT, sp|P42123|LDHB_RAT, tr|D3Z8I7|D3Z8I7_RAT, sp|P47727|CBR1_RAT, sp|P12346|TRFE_RAT
GO:0048513	animal organ development	7	sp|P67779|PHB_RAT, sp|P06761|GRP78_RAT, sp|P42123|LDHB_RAT, sp|P07483|FABPH_RAT, sp|P02793|FRIL1_RAT, sp|P12346|TRFE_RAT, sp|P01946|HBA_RAT
GO:1901360	organic cyclic compound metabolic process	7	sp|P67779|PHB_RAT, sp|P06761|GRP78_RAT, sp|P42123|LDHB_RAT, sp|P07483|FABPH_RAT, tr|D3Z8I7|D3Z8I7_RAT, sp|P47727|CBR1_RAT, sp|P12346|TRFE_RAT
GO:0046483	heterocycle metabolic process	7	sp|P67779|PHB_RAT, sp|P06761|GRP78_RAT, sp|P42123|LDHB_RAT, sp|P07483|FABPH_RAT, tr|D3Z8I7|D3Z8I7_RAT, sp|P47727|CBR1_RAT, sp|P12346|TRFE_RAT
GO:1901576	organic substance biosynthetic process	7	sp|P67779|PHB_RAT, sp|P06761|GRP78_RAT, sp|P07483|FABPH_RAT, sp|P42123|LDHB_RAT, tr|D3Z8I7|D3Z8I7_RAT, sp|P47727|CBR1_RAT, sp|P12346|TRFE_RAT
GO:0007275	multicellular organism development	7	sp|P67779|PHB_RAT, sp|P06761|GRP78_RAT, sp|P07483|FABPH_RAT, sp|P42123|LDHB_RAT, sp|P02793|FRIL1_RAT, sp|P12346|TRFE_RAT, sp|P01946|HBA_RAT
GO:0006725	cellular aromatic compound metabolic process	6	sp|P67779|PHB_RAT, sp|P06761|GRP78_RAT, sp|P42123|LDHB_RAT, sp|P07483|FABPH_RAT, tr|D3Z8I7|D3Z8I7_RAT, sp|P12346|TRFE_RAT
GO:0006139	nucleobase-containing compound metabolic process	6	sp|P67779|PHB_RAT, sp|P06761|GRP78_RAT, sp|P42123|LDHB_RAT, sp|P07483|FABPH_RAT, tr|D3Z8I7|D3Z8I7_RAT, sp|P12346|TRFE_RAT
GO:0034641	cellular nitrogen compound metabolic process	6	sp|P67779|PHB_RAT, sp|P06761|GRP78_RAT, sp|P42123|LDHB_RAT, sp|P07483|FABPH_RAT, tr|D3Z8I7|D3Z8I7_RAT, sp|P12346|TRFE_RAT
GO:0010033	response to organic substance	6	sp|P67779|PHB_RAT, sp|P06761|GRP78_RAT, sp|P07483|FABPH_RAT, sp|P47727|CBR1_RAT, sp|P01946|HBA_RAT, sp|P12346|TRFE_RAT
GO:1901564	organonitrogen compound metabolic process	5	sp|P67779|PHB_RAT, sp|P07483|FABPH_RAT, sp|P42123|LDHB_RAT, tr|D3Z8I7|D3Z8I7_RAT, sp|P47727|CBR1_RAT
GO:0050877	neurological system process	5	sp|P67779|PHB_RAT, sp|P07483|FABPH_RAT, sp|P47727|CBR1_RAT, sp|P02793|FRIL1_RAT, sp|P12346|TRFE_RAT
GO:1901575	organic substance catabolic process	5	sp|P67779|PHB_RAT, sp|P06761|GRP78_RAT, sp|P07483|FABPH_RAT, sp|P42123|LDHB_RAT, sp|P47727|CBR1_RAT
GO:0070887	cellular response to chemical stimulus	5	sp|P67779|PHB_RAT, sp|P06761|GRP78_RAT, sp|P07483|FABPH_RAT, tr|D3Z8I7|D3Z8I7_RAT, sp|P12346|TRFE_RAT
GO:0006793	phosphorus metabolic process	5	sp|P67779|PHB_RAT, sp|P06761|GRP78_RAT, sp|P07483|FABPH_RAT, sp|P42123|LDHB_RAT, sp|P12346|TRFE_RAT
GO:0043170	macromolecule metabolic process	5	sp|P67779|PHB_RAT, sp|P06761|GRP78_RAT, sp|P07483|FABPH_RAT, tr|D3Z8I7|D3Z8I7_RAT, sp|P12346|TRFE_RAT
GO:0055114	oxidation-reduction process	5	sp|P19132|FRIH_RAT, sp|P42123|LDHB_RAT, sp|P07483|FABPH_RAT, sp|P47727|CBR1_RAT, sp|P02793|FRIL1_RAT
GO:0044260	cellular macromolecule metabolic process	5	sp|P67779|PHB_RAT, sp|P06761|GRP78_RAT, sp|P07483|FABPH_RAT, tr|D3Z8I7|D3Z8I7_RAT, sp|P12346|TRFE_RAT
GO:0042592	homeostatic process	5	sp|P19132|FRIH_RAT, sp|P07483|FABPH_RAT, sp|P02793|FRIL1_RAT, sp|P12346|TRFE_RAT, sp|P01946|HBA_RAT
GO:0044281	small molecule metabolic process	5	sp|P67779|PHB_RAT, sp|P06761|GRP78_RAT, sp|P42123|LDHB_RAT, sp|P07483|FABPH_RAT, sp|P47727|CBR1_RAT
GO:0048468	cell development	5	sp|P67779|PHB_RAT, sp|P06761|GRP78_RAT, sp|P02793|FRIL1_RAT, sp|P12346|TRFE_RAT, sp|P01946|HBA_RAT
GO:0044712	single-organism catabolic process	4	sp|P06761|GRP78_RAT, sp|P07483|FABPH_RAT, sp|P42123|LDHB_RAT, sp|P47727|CBR1_RAT
GO:0009889	regulation of biosynthetic process	4	sp|P67779|PHB_RAT, sp|P06761|GRP78_RAT, sp|P07483|FABPH_RAT, sp|P12346|TRFE_RAT
GO:0009888	tissue development	4	sp|P67779|PHB_RAT, sp|P47727|CBR1_RAT, sp|P02793|FRIL1_RAT, sp|P12346|TRFE_RAT
GO:0019538	protein metabolic process	4	sp|P67779|PHB_RAT, sp|P06761|GRP78_RAT, sp|P07483|FABPH_RAT, sp|P12346|TRFE_RAT
GO:0044711	single-organism biosynthetic process	4	sp|P07483|FABPH_RAT, sp|P42123|LDHB_RAT, tr|D3Z8I7|D3Z8I7_RAT, sp|P47727|CBR1_RAT
GO:0080090	regulation of primary metabolic process	4	sp|P67779|PHB_RAT, sp|P06761|GRP78_RAT, sp|P07483|FABPH_RAT, sp|P12346|TRFE_RAT
GO:0009891	positive regulation of biosynthetic process	4	sp|P67779|PHB_RAT, sp|P06761|GRP78_RAT, sp|P07483|FABPH_RAT, sp|P12346|TRFE_RAT
GO:0060255	regulation of macromolecule metabolic process	4	sp|P67779|PHB_RAT, sp|P06761|GRP78_RAT, sp|P07483|FABPH_RAT, sp|P12346|TRFE_RAT
GO:0080134	regulation of response to stress	4	sp|P67779|PHB_RAT, sp|P06761|GRP78_RAT, sp|P07483|FABPH_RAT, sp|P12346|TRFE_RAT
GO:0051171	regulation of nitrogen compound metabolic process	4	sp|P67779|PHB_RAT, sp|P06761|GRP78_RAT, sp|P07483|FABPH_RAT, sp|P12346|TRFE_RAT
GO:0044765	single-organism transport	4	sp|P67779|PHB_RAT, sp|P07483|FABPH_RAT, sp|P12346|TRFE_RAT, sp|P01946|HBA_RAT
GO:0010035	response to inorganic substance	4	sp|P67779|PHB_RAT, sp|P06761|GRP78_RAT, sp|P07483|FABPH_RAT, sp|P12346|TRFE_RAT
GO:0044093	positive regulation of molecular function	4	sp|P19132|FRIH_RAT, sp|P67779|PHB_RAT, sp|P06761|GRP78_RAT, sp|P12346|TRFE_RAT
GO:0044092	negative regulation of molecular function	4	sp|P67779|PHB_RAT, sp|P06761|GRP78_RAT, sp|P07483|FABPH_RAT, sp|P12346|TRFE_RAT
GO:0010604	positive regulation of macromolecule metabolic process	4	sp|P67779|PHB_RAT, sp|P06761|GRP78_RAT, sp|P07483|FABPH_RAT, sp|P12346|TRFE_RAT
GO:1901700	response to oxygen-containing compound	4	sp|P67779|PHB_RAT, sp|P07483|FABPH_RAT, sp|P47727|CBR1_RAT, sp|P12346|TRFE_RAT
GO:0050790	regulation of catalytic activity	4	sp|P19132|FRIH_RAT, sp|P06761|GRP78_RAT, sp|P07483|FABPH_RAT, sp|P12346|TRFE_RAT
GO:0042127	regulation of cell proliferation	4	sp|P19132|FRIH_RAT, sp|P67779|PHB_RAT, sp|P07483|FABPH_RAT, sp|P12346|TRFE_RAT
GO:0031325	positive regulation of cellular metabolic process	4	sp|P67779|PHB_RAT, sp|P06761|GRP78_RAT, sp|P07483|FABPH_RAT, sp|P12346|TRFE_RAT
GO:0008104	protein localization	4	sp|P67779|PHB_RAT, sp|P06761|GRP78_RAT, sp|P12346|TRFE_RAT, sp|Q8VIF7|SBP1_RAT
GO:0031323	regulation of cellular metabolic process	4	sp|P67779|PHB_RAT, sp|P06761|GRP78_RAT, sp|P07483|FABPH_RAT, sp|P12346|TRFE_RAT
GO:0051651	maintenance of location in cell	3	sp|P19132|FRIH_RAT, sp|P06761|GRP78_RAT, sp|P02793|FRIL1_RAT
GO:0010876	lipid localization	3	sp|P67779|PHB_RAT, sp|P06761|GRP78_RAT, sp|P07483|FABPH_RAT
GO:0009725	response to hormone	3	sp|P67779|PHB_RAT, sp|P07483|FABPH_RAT, sp|P12346|TRFE_RAT
GO:0006082	organic acid metabolic process	3	sp|P42123|LDHB_RAT, sp|P07483|FABPH_RAT, sp|P47727|CBR1_RAT
GO:2000026	regulation of multicellular organismal development	3	sp|P67779|PHB_RAT, sp|P06761|GRP78_RAT, sp|P12346|TRFE_RAT
GO:0010646	regulation of cell communication	3	sp|P67779|PHB_RAT, sp|P06761|GRP78_RAT, sp|P12346|TRFE_RAT
GO:0051173	positive regulation of nitrogen compound metabolic process	3	sp|P67779|PHB_RAT, sp|P06761|GRP78_RAT, sp|P12346|TRFE_RAT
GO:0006979	response to oxidative stress	3	sp|P67779|PHB_RAT, tr|D3Z8I7|D3Z8I7_RAT, sp|P01946|HBA_RAT
GO:0008284	positive regulation of cell proliferation	3	sp|P19132|FRIH_RAT, sp|P07483|FABPH_RAT, sp|P12346|TRFE_RAT
GO:0032101	regulation of response to external stimulus	3	sp|P67779|PHB_RAT, sp|P07483|FABPH_RAT, sp|P12346|TRFE_RAT
GO:0006952	defense response	3	sp|P67779|PHB_RAT, sp|P07483|FABPH_RAT, sp|P12346|TRFE_RAT
GO:0008285	negative regulation of cell proliferation	3	sp|P19132|FRIH_RAT, sp|P67779|PHB_RAT, sp|P07483|FABPH_RAT
GO:0044248	cellular catabolic process	3	sp|P06761|GRP78_RAT, sp|P07483|FABPH_RAT, sp|P47727|CBR1_RAT
GO:1901698	response to nitrogen compound	3	sp|P67779|PHB_RAT, sp|P07483|FABPH_RAT, sp|P12346|TRFE_RAT
GO:0060548	negative regulation of cell death	3	sp|P67779|PHB_RAT, sp|P06761|GRP78_RAT, sp|P12346|TRFE_RAT
GO:0051130	positive regulation of cellular component organization	3	sp|P67779|PHB_RAT, sp|P06761|GRP78_RAT, sp|P12346|TRFE_RAT
GO:0019725	cellular homeostasis	3	sp|P19132|FRIH_RAT, sp|P02793|FRIL1_RAT, sp|P12346|TRFE_RAT
GO:0010605	negative regulation of macromolecule metabolic process	3	sp|P67779|PHB_RAT, sp|P06761|GRP78_RAT, sp|P07483|FABPH_RAT
GO:0019637	organophosphate metabolic process	3	sp|P67779|PHB_RAT, sp|P07483|FABPH_RAT, sp|P42123|LDHB_RAT
GO:0010648	negative regulation of cell communication	3	sp|P67779|PHB_RAT, sp|P06761|GRP78_RAT, sp|P12346|TRFE_RAT
GO:0071495	cellular response to endogenous stimulus	3	sp|P67779|PHB_RAT, sp|P06761|GRP78_RAT, sp|P12346|TRFE_RAT
GO:0009966	regulation of signal transduction	3	sp|P67779|PHB_RAT, sp|P06761|GRP78_RAT, sp|P12346|TRFE_RAT
GO:0033554	cellular response to stress	3	sp|P67779|PHB_RAT, sp|P06761|GRP78_RAT, sp|P12346|TRFE_RAT
GO:0006996	organelle organization	3	sp|P67779|PHB_RAT, sp|P06761|GRP78_RAT, sp|P12346|TRFE_RAT
GO:0009968	negative regulation of signal transduction	3	sp|P67779|PHB_RAT, sp|P06761|GRP78_RAT, sp|P12346|TRFE_RAT
GO:0045184	establishment of protein localization	3	sp|P67779|PHB_RAT, sp|P12346|TRFE_RAT, sp|Q8VIF7|SBP1_RAT
GO:0008219	cell death	3	sp|P67779|PHB_RAT, sp|P06761|GRP78_RAT, sp|P12346|TRFE_RAT
GO:0051128	regulation of cellular component organization	3	sp|P67779|PHB_RAT, sp|P06761|GRP78_RAT, sp|P12346|TRFE_RAT
GO:0010941	regulation of cell death	3	sp|P67779|PHB_RAT, sp|P06761|GRP78_RAT, sp|P12346|TRFE_RAT
GO:0050778	positive regulation of immune response	2	sp|P67779|PHB_RAT, sp|P12346|TRFE_RAT
GO:0055086	nucleobase-containing small molecule metabolic process	2	sp|P67779|PHB_RAT, sp|P42123|LDHB_RAT
GO:0007420	brain development	2	sp|P06761|GRP78_RAT, sp|P07483|FABPH_RAT
GO:1901657	glycosyl compound metabolic process	2	sp|P67779|PHB_RAT, sp|P42123|LDHB_RAT
GO:0032102	negative regulation of response to external stimulus	2	sp|P07483|FABPH_RAT, sp|P12346|TRFE_RAT
GO:1902589	single-organism organelle organization	2	sp|P67779|PHB_RAT, sp|P12346|TRFE_RAT
GO:0051962	positive regulation of nervous system development	2	sp|P06761|GRP78_RAT, sp|P12346|TRFE_RAT
GO:0023014	signal transduction by protein phosphorylation	2	sp|P67779|PHB_RAT, sp|P12346|TRFE_RAT
GO:0006928	movement of cell or subcellular component	2	sp|P06761|GRP78_RAT, sp|P12346|TRFE_RAT
GO:0010647	positive regulation of cell communication	2	sp|P67779|PHB_RAT, sp|P12346|TRFE_RAT
GO:0030431	sleep	2	sp|P06761|GRP78_RAT, sp|P07483|FABPH_RAT
GO:0006790	sulfur compound metabolic process	2	sp|P42123|LDHB_RAT, tr|D3Z8I7|D3Z8I7_RAT
GO:0001503	ossification	2	sp|P67779|PHB_RAT, sp|P12346|TRFE_RAT
GO:0009887	animal organ morphogenesis	2	sp|P67779|PHB_RAT, sp|P12346|TRFE_RAT
GO:0050673	epithelial cell proliferation	2	sp|P67779|PHB_RAT, sp|P07483|FABPH_RAT
GO:2000147	positive regulation of cell motility	2	sp|P06761|GRP78_RAT, sp|P12346|TRFE_RAT
GO:0009967	positive regulation of signal transduction	2	sp|P67779|PHB_RAT, sp|P12346|TRFE_RAT
GO:0009791	post-embryonic development	2	sp|P67779|PHB_RAT, sp|P06761|GRP78_RAT
GO:0001816	cytokine production	2	sp|P07483|FABPH_RAT, sp|P12346|TRFE_RAT
GO:0019915	lipid storage	2	sp|P67779|PHB_RAT, sp|P06761|GRP78_RAT
GO:0031324	negative regulation of cellular metabolic process	2	sp|P67779|PHB_RAT, sp|P07483|FABPH_RAT
GO:0061351	neural precursor cell proliferation	2	sp|P07483|FABPH_RAT, sp|P12346|TRFE_RAT
GO:0051172	negative regulation of nitrogen compound metabolic process	2	sp|P67779|PHB_RAT, sp|P07483|FABPH_RAT
GO:0007548	sex differentiation	2	sp|P67779|PHB_RAT, sp|P06761|GRP78_RAT
GO:0006091	generation of precursor metabolites and energy	2	sp|P67779|PHB_RAT, sp|P42123|LDHB_RAT
GO:0005975	carbohydrate metabolic process	2	sp|P06761|GRP78_RAT, sp|P42123|LDHB_RAT
GO:0051238	sequestering of metal ion	2	sp|P19132|FRIH_RAT, sp|P02793|FRIL1_RAT
GO:0080135	regulation of cellular response to stress	2	sp|P06761|GRP78_RAT, sp|P12346|TRFE_RAT
GO:2000145	regulation of cell motility	2	sp|P06761|GRP78_RAT, sp|P12346|TRFE_RAT
GO:0051272	positive regulation of cellular component movement	2	sp|P06761|GRP78_RAT, sp|P12346|TRFE_RAT
GO:0045137	development of primary sexual characteristics	2	sp|P67779|PHB_RAT, sp|P06761|GRP78_RAT
GO:0045597	positive regulation of cell differentiation	2	sp|P06761|GRP78_RAT, sp|P12346|TRFE_RAT
GO:0006629	lipid metabolic process	2	sp|P07483|FABPH_RAT, sp|P47727|CBR1_RAT
GO:1901135	carbohydrate derivative metabolic process	2	sp|P67779|PHB_RAT, sp|P42123|LDHB_RAT
GO:0070727	cellular macromolecule localization	2	sp|P67779|PHB_RAT, sp|P06761|GRP78_RAT
GO:0042180	cellular ketone metabolic process	2	sp|P07483|FABPH_RAT, sp|P47727|CBR1_RAT
GO:0051090	regulation of sequence-specific DNA binding transcription factor activity	2	sp|P67779|PHB_RAT, sp|P12346|TRFE_RAT
GO:0007281	germ cell development	2	sp|P67779|PHB_RAT, sp|P06761|GRP78_RAT
GO:0008406	gonad development	2	sp|P67779|PHB_RAT, sp|P06761|GRP78_RAT
GO:0060322	head development	2	sp|P06761|GRP78_RAT, sp|P07483|FABPH_RAT
GO:0044723	single-organism carbohydrate metabolic process	2	sp|P06761|GRP78_RAT, sp|P42123|LDHB_RAT
GO:0007166	cell surface receptor signaling pathway	2	sp|P06761|GRP78_RAT, sp|P12346|TRFE_RAT
GO:0007049	cell cycle	2	sp|P67779|PHB_RAT, sp|P06761|GRP78_RAT
GO:0022412	cellular process involved in reproduction in multicellular organism	2	sp|P67779|PHB_RAT, sp|P06761|GRP78_RAT
GO:0051186	cofactor metabolic process	2	sp|P42123|LDHB_RAT, sp|P47727|CBR1_RAT
GO:0035556	intracellular signal transduction	2	sp|P67779|PHB_RAT, sp|P12346|TRFE_RAT
GO:0009890	negative regulation of biosynthetic process	2	sp|P67779|PHB_RAT, sp|P07483|FABPH_RAT
GO:0050776	regulation of immune response	2	sp|P67779|PHB_RAT, sp|P12346|TRFE_RAT
GO:0007276	gamete generation	2	sp|P67779|PHB_RAT, sp|P06761|GRP78_RAT
GO:1901615	organic hydroxy compound metabolic process	2	sp|P42123|LDHB_RAT, sp|P47727|CBR1_RAT
GO:0031349	positive regulation of defense response	2	sp|P07483|FABPH_RAT, sp|P12346|TRFE_RAT
GO:0071216	cellular response to biotic stimulus	2	sp|P06761|GRP78_RAT, sp|P12346|TRFE_RAT
GO:0048608	reproductive structure development	2	sp|P67779|PHB_RAT, sp|P06761|GRP78_RAT
GO:0044255	cellular lipid metabolic process	2	sp|P07483|FABPH_RAT, sp|P47727|CBR1_RAT
GO:0006959	humoral immune response	2	sp|P67779|PHB_RAT, sp|P12346|TRFE_RAT
GO:0048534	hematopoietic or lymphoid organ development	2	sp|P01946|HBA_RAT, sp|P12346|TRFE_RAT
GO:0031647	regulation of protein stability	2	sp|P67779|PHB_RAT, sp|P12346|TRFE_RAT
GO:0010243	response to organonitrogen compound	2	sp|P07483|FABPH_RAT, sp|P12346|TRFE_RAT
GO:0045595	regulation of cell differentiation	2	sp|P06761|GRP78_RAT, sp|P12346|TRFE_RAT
GO:0051270	regulation of cellular component movement	2	sp|P06761|GRP78_RAT, sp|P12346|TRFE_RAT
GO:0030968	endoplasmic reticulum unfolded protein response	1	sp|P06761|GRP78_RAT
GO:1903011	negative regulation of bone development	1	sp|P12346|TRFE_RAT
GO:0044057	regulation of system process	1	sp|P12346|TRFE_RAT
GO:0001558	regulation of cell growth	1	sp|P67779|PHB_RAT
GO:0021549	cerebellum development	1	sp|P06761|GRP78_RAT
GO:0032989	cellular component morphogenesis	1	sp|P67779|PHB_RAT
GO:0009755	hormone-mediated signaling pathway	1	sp|P67779|PHB_RAT
GO:0097164	ammonium ion metabolic process	1	sp|P07483|FABPH_RAT
GO:0033600	negative regulation of mammary gland epithelial cell proliferation	1	sp|P67779|PHB_RAT
GO:0060348	bone development	1	sp|P12346|TRFE_RAT
GO:0030308	negative regulation of cell growth	1	sp|P67779|PHB_RAT
GO:0098609	cell-cell adhesion	1	sp|P06761|GRP78_RAT
GO:0099402	plant organ development	1	sp|P67779|PHB_RAT
GO:0045136	development of secondary sexual characteristics	1	sp|P67779|PHB_RAT
GO:0090068	positive regulation of cell cycle process	1	sp|P67779|PHB_RAT
GO:0048525	negative regulation of viral process	1	sp|P12346|TRFE_RAT
GO:0042197	halogenated hydrocarbon metabolic process	1	tr|D3Z8I7|D3Z8I7_RAT
GO:0097435	supramolecular fiber organization	1	sp|P12346|TRFE_RAT
GO:0051301	cell division	1	sp|P67779|PHB_RAT
GO:0007423	sensory organ development	1	sp|P42123|LDHB_RAT
GO:0007186	G-protein coupled receptor signaling pathway	1	sp|P67779|PHB_RAT
GO:0007588	excretion	1	sp|P67779|PHB_RAT
GO:2000259	positive regulation of protein activation cascade	1	sp|P67779|PHB_RAT
GO:0090287	regulation of cellular response to growth factor stimulus	1	sp|P06761|GRP78_RAT
GO:0007272	ensheathment of neurons	1	sp|P12346|TRFE_RAT
GO:0051092	positive regulation of NF-kappaB transcription factor activity	1	sp|P12346|TRFE_RAT
GO:0035988	chondrocyte proliferation	1	sp|P12346|TRFE_RAT
GO:0098869	cellular oxidant detoxification	1	tr|D3Z8I7|D3Z8I7_RAT
GO:0048532	anatomical structure arrangement	1	sp|P06761|GRP78_RAT
GO:0060744	mammary gland branching involved in thelarche	1	sp|P67779|PHB_RAT
GO:0021700	developmental maturation	1	sp|P12346|TRFE_RAT
GO:0044802	single-organism membrane organization	1	sp|P67779|PHB_RAT
GO:0034103	regulation of tissue remodeling	1	sp|P12346|TRFE_RAT
GO:1900190	regulation of single-species biofilm formation	1	sp|P12346|TRFE_RAT
GO:0060749	mammary gland alveolus development	1	sp|P67779|PHB_RAT
GO:0051817	modification of morphology or physiology of other organism involved in symbiotic interaction	1	sp|P12346|TRFE_RAT
GO:0051640	organelle localization	1	sp|P67779|PHB_RAT
GO:0070482	response to oxygen levels	1	sp|P67779|PHB_RAT
GO:0042755	eating behavior	1	sp|P67779|PHB_RAT
GO:0042750	hibernation	1	sp|P07483|FABPH_RAT
GO:0002218	activation of innate immune response	1	sp|P12346|TRFE_RAT
GO:0045787	positive regulation of cell cycle	1	sp|P67779|PHB_RAT
GO:0007568	aging	1	sp|P67779|PHB_RAT
GO:0090696	post-embryonic plant organ development	1	sp|P67779|PHB_RAT
GO:0009636	response to toxic substance	1	tr|D3Z8I7|D3Z8I7_RAT
GO:0051098	regulation of binding	1	sp|P06761|GRP78_RAT
GO:0002832	negative regulation of response to biotic stimulus	1	sp|P12346|TRFE_RAT
GO:0006805	xenobiotic metabolic process	1	tr|D3Z8I7|D3Z8I7_RAT
GO:0048364	root development	1	sp|P67779|PHB_RAT
GO:0021680	cerebellar Purkinje cell layer development	1	sp|P06761|GRP78_RAT
GO:0035239	tube morphogenesis	1	sp|P67779|PHB_RAT
GO:0046677	response to antibiotic	1	sp|P06761|GRP78_RAT
GO:0045807	positive regulation of endocytosis	1	sp|P12346|TRFE_RAT
GO:0051702	interaction with symbiont	1	sp|P12346|TRFE_RAT
GO:0031641	regulation of myelination	1	sp|P12346|TRFE_RAT
GO:0002757	immune response-activating signal transduction	1	sp|P12346|TRFE_RAT
GO:0001817	regulation of cytokine production	1	sp|P12346|TRFE_RAT
GO:0016032	viral process	1	sp|P12346|TRFE_RAT
GO:0034123	positive regulation of toll-like receptor signaling pathway	1	sp|P12346|TRFE_RAT
GO:0016458	gene silencing	1	sp|P06761|GRP78_RAT
GO:0061061	muscle structure development	1	sp|P02793|FRIL1_RAT
GO:0051649	establishment of localization in cell	1	sp|P67779|PHB_RAT
GO:0006956	complement activation	1	sp|P67779|PHB_RAT
GO:0030522	intracellular receptor signaling pathway	1	sp|P67779|PHB_RAT
GO:0048638	regulation of developmental growth	1	sp|P67779|PHB_RAT
GO:0001101	response to acid chemical	1	sp|P07483|FABPH_RAT
GO:0044407	single-species biofilm formation in or on host organism	1	sp|P12346|TRFE_RAT
GO:0031646	positive regulation of neurological system process	1	sp|P12346|TRFE_RAT
GO:0021587	cerebellum morphogenesis	1	sp|P06761|GRP78_RAT
GO:0032103	positive regulation of response to external stimulus	1	sp|P07483|FABPH_RAT
GO:0007098	centrosome cycle	1	sp|P06761|GRP78_RAT
GO:0046907	intracellular transport	1	sp|P67779|PHB_RAT
GO:0045780	positive regulation of bone resorption	1	sp|P12346|TRFE_RAT
GO:0002251	organ or tissue specific immune response	1	sp|P12346|TRFE_RAT
GO:0040019	positive regulation of embryonic development	1	sp|P06761|GRP78_RAT
GO:0016477	cell migration	1	sp|P06761|GRP78_RAT
GO:0060627	regulation of vesicle-mediated transport	1	sp|P12346|TRFE_RAT
GO:0009410	response to xenobiotic stimulus	1	tr|D3Z8I7|D3Z8I7_RAT
GO:0098813	nuclear chromosome segregation	1	sp|P67779|PHB_RAT
GO:0009894	regulation of catabolic process	1	sp|P67779|PHB_RAT
GO:0001964	startle response	1	sp|P07483|FABPH_RAT
GO:0034975	protein folding in endoplasmic reticulum	1	sp|P06761|GRP78_RAT
GO:2000257	regulation of protein activation cascade	1	sp|P67779|PHB_RAT
GO:0030278	regulation of ossification	1	sp|P12346|TRFE_RAT
GO:0010942	positive regulation of cell death	1	sp|P67779|PHB_RAT
GO:0002831	regulation of response to biotic stimulus	1	sp|P12346|TRFE_RAT
GO:0034105	positive regulation of tissue remodeling	1	sp|P12346|TRFE_RAT
GO:0031643	positive regulation of myelination	1	sp|P12346|TRFE_RAT
GO:1900191	negative regulation of single-species biofilm formation	1	sp|P12346|TRFE_RAT
GO:0009895	negative regulation of catabolic process	1	sp|P67779|PHB_RAT
GO:0048729	tissue morphogenesis	1	sp|P67779|PHB_RAT
GO:0021695	cerebellar cortex development	1	sp|P06761|GRP78_RAT
GO:1901685	glutathione derivative metabolic process	1	tr|D3Z8I7|D3Z8I7_RAT
GO:0044262	cellular carbohydrate metabolic process	1	sp|P06761|GRP78_RAT
GO:0033687	osteoblast proliferation	1	sp|P12346|TRFE_RAT
GO:0035966	response to topologically incorrect protein	1	sp|P06761|GRP78_RAT
GO:0021575	hindbrain morphogenesis	1	sp|P06761|GRP78_RAT
GO:0051353	positive regulation of oxidoreductase activity	1	sp|P19132|FRIH_RAT
GO:0006970	response to osmotic stress	1	sp|P67779|PHB_RAT
GO:0071695	anatomical structure maturation	1	sp|P12346|TRFE_RAT
GO:0030901	midbrain development	1	sp|P06761|GRP78_RAT
GO:0007062	sister chromatid cohesion	1	sp|P67779|PHB_RAT
GO:0030029	actin filament-based process	1	sp|P12346|TRFE_RAT
GO:0010171	body morphogenesis	1	sp|P06761|GRP78_RAT
GO:0048771	tissue remodeling	1	sp|P12346|TRFE_RAT
GO:0035264	multicellular organism growth	1	sp|P67779|PHB_RAT
GO:0043207	response to external biotic stimulus	1	sp|P12346|TRFE_RAT
GO:1903332	regulation of protein folding	1	sp|P06761|GRP78_RAT
GO:0001818	negative regulation of cytokine production	1	sp|P12346|TRFE_RAT
GO:1902580	single-organism cellular localization	1	sp|P67779|PHB_RAT
GO:0051726	regulation of cell cycle	1	sp|P67779|PHB_RAT
GO:0040018	positive regulation of multicellular organism growth	1	sp|P67779|PHB_RAT
GO:0048639	positive regulation of developmental growth	1	sp|P67779|PHB_RAT
GO:0060259	regulation of feeding behavior	1	sp|P67779|PHB_RAT
GO:0048857	neural nucleus development	1	sp|P06761|GRP78_RAT
GO:0040014	regulation of multicellular organism growth	1	sp|P67779|PHB_RAT
GO:0045834	positive regulation of lipid metabolic process	1	sp|P07483|FABPH_RAT
GO:0070169	positive regulation of biomineral tissue development	1	sp|P12346|TRFE_RAT
GO:0035295	tube development	1	sp|P67779|PHB_RAT
GO:0034101	erythrocyte homeostasis	1	sp|P01946|HBA_RAT
GO:0045185	maintenance of protein location	1	sp|P06761|GRP78_RAT
GO:0017144	drug metabolic process	1	sp|P47727|CBR1_RAT
GO:0030900	forebrain development	1	sp|P07483|FABPH_RAT
GO:1903047	mitotic cell cycle process	1	sp|P67779|PHB_RAT
GO:0060688	regulation of morphogenesis of a branching structure	1	sp|P67779|PHB_RAT
GO:0002697	regulation of immune effector process	1	sp|P67779|PHB_RAT
GO:1903012	positive regulation of bone development	1	sp|P12346|TRFE_RAT
GO:0045778	positive regulation of ossification	1	sp|P12346|TRFE_RAT
GO:0006325	chromatin organization	1	sp|P67779|PHB_RAT
GO:0006520	cellular amino acid metabolic process	1	sp|P42123|LDHB_RAT
GO:0006575	cellular modified amino acid metabolic process	1	tr|D3Z8I7|D3Z8I7_RAT
GO:0060395	SMAD protein signal transduction	1	sp|P12346|TRFE_RAT
GO:0045596	negative regulation of cell differentiation	1	sp|P12346|TRFE_RAT
GO:0045454	cell redox homeostasis	1	sp|P12346|TRFE_RAT
GO:0042710	biofilm formation	1	sp|P12346|TRFE_RAT
GO:0030030	cell projection organization	1	sp|P06761|GRP78_RAT
GO:0061377	mammary gland lobule development	1	sp|P67779|PHB_RAT
GO:0000226	microtubule cytoskeleton organization	1	sp|P06761|GRP78_RAT
GO:0022603	regulation of anatomical structure morphogenesis	1	sp|P67779|PHB_RAT
GO:0048144	fibroblast proliferation	1	sp|P19132|FRIH_RAT
GO:0030902	hindbrain development	1	sp|P06761|GRP78_RAT
GO:0008340	determination of adult lifespan	1	sp|P67779|PHB_RAT
GO:0002699	positive regulation of immune effector process	1	sp|P67779|PHB_RAT
GO:0048732	gland development	1	sp|P67779|PHB_RAT
GO:0001666	response to hypoxia	1	sp|P67779|PHB_RAT
GO:0022037	metencephalon development	1	sp|P06761|GRP78_RAT
GO:0032940	secretion by cell	1	sp|P12346|TRFE_RAT
GO:0071559	response to transforming growth factor beta	1	sp|P06761|GRP78_RAT
GO:0007059	chromosome segregation	1	sp|P67779|PHB_RAT
GO:1903707	negative regulation of hemopoiesis	1	sp|P12346|TRFE_RAT
GO:0010564	regulation of cell cycle process	1	sp|P67779|PHB_RAT
GO:0044403	symbiosis, encompassing mutualism through parasitism	1	sp|P12346|TRFE_RAT
GO:0006984	ER-nucleus signaling pathway	1	sp|P06761|GRP78_RAT
GO:0042594	response to starvation	1	sp|P06761|GRP78_RAT
GO:0051298	centrosome duplication	1	sp|P06761|GRP78_RAT
GO:0044770	cell cycle phase transition	1	sp|P67779|PHB_RAT
GO:0042493	response to drug	1	sp|P07483|FABPH_RAT
GO:0045087	innate immune response	1	sp|P12346|TRFE_RAT
GO:0002764	immune response-regulating signaling pathway	1	sp|P12346|TRFE_RAT
GO:0061024	membrane organization	1	sp|P67779|PHB_RAT
GO:0090288	negative regulation of cellular response to growth factor stimulus	1	sp|P06761|GRP78_RAT
GO:0051049	regulation of transport	1	sp|P12346|TRFE_RAT
GO:0051341	regulation of oxidoreductase activity	1	sp|P19132|FRIH_RAT
GO:0001763	morphogenesis of a branching structure	1	sp|P67779|PHB_RAT
GO:1901568	fatty acid derivative metabolic process	1	sp|P47727|CBR1_RAT
GO:0048871	multicellular organismal homeostasis	1	sp|P12346|TRFE_RAT
GO:0009991	response to extracellular stimulus	1	sp|P06761|GRP78_RAT
GO:0043903	regulation of symbiosis, encompassing mutualism through parasitism	1	sp|P12346|TRFE_RAT
GO:0050792	regulation of viral process	1	sp|P12346|TRFE_RAT
GO:0036503	ERAD pathway	1	sp|P06761|GRP78_RAT
GO:0071496	cellular response to external stimulus	1	sp|P06761|GRP78_RAT
GO:0031668	cellular response to extracellular stimulus	1	sp|P06761|GRP78_RAT
GO:1903706	regulation of hemopoiesis	1	sp|P12346|TRFE_RAT
GO:0045124	regulation of bone resorption	1	sp|P12346|TRFE_RAT
GO Distribution by Level (5)
GO-id	GO-term	#Seqs	Seqs
GO:0030154	cell differentiation	8	sp|P67779|PHB_RAT, sp|P06761|GRP78_RAT, sp|P07483|FABPH_RAT, sp|P47727|CBR1_RAT, sp|P02793|FRIL1_RAT, sp|P12346|TRFE_RAT, sp|P01946|HBA_RAT, sp|Q8VIF7|SBP1_RAT
GO:0043412	macromolecule modification	5	sp|P67779|PHB_RAT, sp|P06761|GRP78_RAT, sp|P07483|FABPH_RAT, tr|D3Z8I7|D3Z8I7_RAT, sp|P12346|TRFE_RAT
GO:0018130	heterocycle biosynthetic process	5	sp|P67779|PHB_RAT, sp|P06761|GRP78_RAT, sp|P07483|FABPH_RAT, sp|P47727|CBR1_RAT, sp|P12346|TRFE_RAT
GO:0006796	phosphate-containing compound metabolic process	5	sp|P67779|PHB_RAT, sp|P06761|GRP78_RAT, sp|P07483|FABPH_RAT, sp|P42123|LDHB_RAT, sp|P12346|TRFE_RAT
GO:0090304	nucleic acid metabolic process	5	sp|P67779|PHB_RAT, sp|P06761|GRP78_RAT, sp|P07483|FABPH_RAT, tr|D3Z8I7|D3Z8I7_RAT, sp|P12346|TRFE_RAT
GO:1901362	organic cyclic compound biosynthetic process	5	sp|P67779|PHB_RAT, sp|P06761|GRP78_RAT, sp|P07483|FABPH_RAT, sp|P47727|CBR1_RAT, sp|P12346|TRFE_RAT
GO:0036211	protein modification process	4	sp|P67779|PHB_RAT, sp|P06761|GRP78_RAT, sp|P07483|FABPH_RAT, sp|P12346|TRFE_RAT
GO:0019219	regulation of nucleobase-containing compound metabolic process	4	sp|P67779|PHB_RAT, sp|P06761|GRP78_RAT, sp|P07483|FABPH_RAT, sp|P12346|TRFE_RAT
GO:0019438	aromatic compound biosynthetic process	4	sp|P67779|PHB_RAT, sp|P06761|GRP78_RAT, sp|P07483|FABPH_RAT, sp|P12346|TRFE_RAT
GO:0034645	cellular macromolecule biosynthetic process	4	sp|P67779|PHB_RAT, sp|P06761|GRP78_RAT, sp|P07483|FABPH_RAT, sp|P12346|TRFE_RAT
GO:0010467	gene expression	4	sp|P67779|PHB_RAT, sp|P06761|GRP78_RAT, sp|P07483|FABPH_RAT, sp|P12346|TRFE_RAT
GO:0031328	positive regulation of cellular biosynthetic process	4	sp|P67779|PHB_RAT, sp|P06761|GRP78_RAT, sp|P07483|FABPH_RAT, sp|P12346|TRFE_RAT
GO:0034654	nucleobase-containing compound biosynthetic process	4	sp|P67779|PHB_RAT, sp|P06761|GRP78_RAT, sp|P07483|FABPH_RAT, sp|P12346|TRFE_RAT
GO:0010628	positive regulation of gene expression	4	sp|P67779|PHB_RAT, sp|P06761|GRP78_RAT, sp|P07483|FABPH_RAT, sp|P12346|TRFE_RAT
GO:0032268	regulation of cellular protein metabolic process	4	sp|P67779|PHB_RAT, sp|P06761|GRP78_RAT, sp|P07483|FABPH_RAT, sp|P12346|TRFE_RAT
GO:0051174	regulation of phosphorus metabolic process	4	sp|P67779|PHB_RAT, sp|P06761|GRP78_RAT, sp|P07483|FABPH_RAT, sp|P12346|TRFE_RAT
GO:0051246	regulation of protein metabolic process	4	sp|P67779|PHB_RAT, sp|P06761|GRP78_RAT, sp|P07483|FABPH_RAT, sp|P12346|TRFE_RAT
GO:0006811	ion transport	4	sp|P19132|FRIH_RAT, sp|P07483|FABPH_RAT, sp|P02793|FRIL1_RAT, sp|P12346|TRFE_RAT
GO:0010562	positive regulation of phosphorus metabolic process	4	sp|P67779|PHB_RAT, sp|P06761|GRP78_RAT, sp|P07483|FABPH_RAT, sp|P12346|TRFE_RAT
GO:0010556	regulation of macromolecule biosynthetic process	4	sp|P67779|PHB_RAT, sp|P06761|GRP78_RAT, sp|P07483|FABPH_RAT, sp|P12346|TRFE_RAT
GO:0009059	macromolecule biosynthetic process	4	sp|P67779|PHB_RAT, sp|P06761|GRP78_RAT, sp|P07483|FABPH_RAT, sp|P12346|TRFE_RAT
GO:0044271	cellular nitrogen compound biosynthetic process	4	sp|P67779|PHB_RAT, sp|P06761|GRP78_RAT, sp|P07483|FABPH_RAT, sp|P12346|TRFE_RAT
GO:0048878	chemical homeostasis	4	sp|P19132|FRIH_RAT, sp|P07483|FABPH_RAT, sp|P02793|FRIL1_RAT, sp|P12346|TRFE_RAT
GO:0071702	organic substance transport	4	sp|P67779|PHB_RAT, sp|P07483|FABPH_RAT, sp|P12346|TRFE_RAT, sp|Q8VIF7|SBP1_RAT
GO:0010468	regulation of gene expression	4	sp|P67779|PHB_RAT, sp|P06761|GRP78_RAT, sp|P07483|FABPH_RAT, sp|P12346|TRFE_RAT
GO:0031326	regulation of cellular biosynthetic process	4	sp|P67779|PHB_RAT, sp|P06761|GRP78_RAT, sp|P07483|FABPH_RAT, sp|P12346|TRFE_RAT
GO:0071310	cellular response to organic substance	4	sp|P67779|PHB_RAT, sp|P06761|GRP78_RAT, sp|P07483|FABPH_RAT, sp|P12346|TRFE_RAT
GO:0051252	regulation of RNA metabolic process	4	sp|P67779|PHB_RAT, sp|P06761|GRP78_RAT, sp|P07483|FABPH_RAT, sp|P12346|TRFE_RAT
GO:0044267	cellular protein metabolic process	4	sp|P67779|PHB_RAT, sp|P06761|GRP78_RAT, sp|P07483|FABPH_RAT, sp|P12346|TRFE_RAT
GO:0016070	RNA metabolic process	4	sp|P67779|PHB_RAT, sp|P06761|GRP78_RAT, sp|P07483|FABPH_RAT, sp|P12346|TRFE_RAT
GO:0045935	positive regulation of nucleobase-containing compound metabolic process	3	sp|P67779|PHB_RAT, sp|P06761|GRP78_RAT, sp|P12346|TRFE_RAT
GO:0006954	inflammatory response	3	sp|P67779|PHB_RAT, sp|P07483|FABPH_RAT, sp|P12346|TRFE_RAT
GO:0051254	positive regulation of RNA metabolic process	3	sp|P67779|PHB_RAT, sp|P06761|GRP78_RAT, sp|P12346|TRFE_RAT
GO:0031347	regulation of defense response	3	sp|P67779|PHB_RAT, sp|P07483|FABPH_RAT, sp|P12346|TRFE_RAT
GO:0051247	positive regulation of protein metabolic process	3	sp|P67779|PHB_RAT, sp|P06761|GRP78_RAT, sp|P12346|TRFE_RAT
GO:0043436	oxoacid metabolic process	3	sp|P42123|LDHB_RAT, sp|P07483|FABPH_RAT, sp|P47727|CBR1_RAT
GO:0010557	positive regulation of macromolecule biosynthetic process	3	sp|P67779|PHB_RAT, sp|P06761|GRP78_RAT, sp|P12346|TRFE_RAT
GO:0071241	cellular response to inorganic substance	3	sp|P06761|GRP78_RAT, sp|P07483|FABPH_RAT, sp|P12346|TRFE_RAT
GO:0055082	cellular chemical homeostasis	3	sp|P19132|FRIH_RAT, sp|P02793|FRIL1_RAT, sp|P12346|TRFE_RAT
GO:0043069	negative regulation of programmed cell death	3	sp|P67779|PHB_RAT, sp|P06761|GRP78_RAT, sp|P12346|TRFE_RAT
GO:0043067	regulation of programmed cell death	3	sp|P67779|PHB_RAT, sp|P06761|GRP78_RAT, sp|P12346|TRFE_RAT
GO:0033993	response to lipid	3	sp|P67779|PHB_RAT, sp|P07483|FABPH_RAT, sp|P12346|TRFE_RAT
GO:0009790	embryo development	3	sp|P67779|PHB_RAT, sp|P06761|GRP78_RAT, sp|P01946|HBA_RAT
GO:0051338	regulation of transferase activity	3	sp|P06761|GRP78_RAT, sp|P07483|FABPH_RAT, sp|P12346|TRFE_RAT
GO:0010629	negative regulation of gene expression	3	sp|P67779|PHB_RAT, sp|P06761|GRP78_RAT, sp|P07483|FABPH_RAT
GO:0014070	response to organic cyclic compound	3	sp|P67779|PHB_RAT, sp|P01946|HBA_RAT, sp|P12346|TRFE_RAT
GO:0010038	response to metal ion	3	sp|P06761|GRP78_RAT, sp|P07483|FABPH_RAT, sp|P12346|TRFE_RAT
GO:0034097	response to cytokine	3	sp|P67779|PHB_RAT, sp|P06761|GRP78_RAT, sp|P07483|FABPH_RAT
GO:0032270	positive regulation of cellular protein metabolic process	3	sp|P67779|PHB_RAT, sp|P06761|GRP78_RAT, sp|P12346|TRFE_RAT
GO:0012501	programmed cell death	3	sp|P67779|PHB_RAT, sp|P06761|GRP78_RAT, sp|P12346|TRFE_RAT
GO:0015031	protein transport	3	sp|P67779|PHB_RAT, sp|P12346|TRFE_RAT, sp|Q8VIF7|SBP1_RAT
GO:1901566	organonitrogen compound biosynthetic process	3	sp|P07483|FABPH_RAT, tr|D3Z8I7|D3Z8I7_RAT, sp|P47727|CBR1_RAT
GO:0043085	positive regulation of catalytic activity	3	sp|P19132|FRIH_RAT, sp|P06761|GRP78_RAT, sp|P12346|TRFE_RAT
GO:0007399	nervous system development	3	sp|P06761|GRP78_RAT, sp|P07483|FABPH_RAT, sp|P12346|TRFE_RAT
GO:0006753	nucleoside phosphate metabolic process	2	sp|P67779|PHB_RAT, sp|P42123|LDHB_RAT
GO:0032269	negative regulation of cellular protein metabolic process	2	sp|P67779|PHB_RAT, sp|P07483|FABPH_RAT
GO:0050769	positive regulation of neurogenesis	2	sp|P06761|GRP78_RAT, sp|P12346|TRFE_RAT
GO:0097577	sequestering of iron ion	2	sp|P19132|FRIH_RAT, sp|P02793|FRIL1_RAT
GO:0032870	cellular response to hormone stimulus	2	sp|P67779|PHB_RAT, sp|P12346|TRFE_RAT
GO:0051253	negative regulation of RNA metabolic process	2	sp|P67779|PHB_RAT, sp|P07483|FABPH_RAT
GO:0060284	regulation of cell development	2	sp|P06761|GRP78_RAT, sp|P12346|TRFE_RAT
GO:1902533	positive regulation of intracellular signal transduction	2	sp|P67779|PHB_RAT, sp|P12346|TRFE_RAT
GO:0007600	sensory perception	2	sp|P67779|PHB_RAT, sp|P02793|FRIL1_RAT
GO:0044283	small molecule biosynthetic process	2	sp|P42123|LDHB_RAT, sp|P47727|CBR1_RAT
GO:0006631	fatty acid metabolic process	2	sp|P07483|FABPH_RAT, sp|P47727|CBR1_RAT
GO:0010558	negative regulation of macromolecule biosynthetic process	2	sp|P67779|PHB_RAT, sp|P07483|FABPH_RAT
GO:0000165	MAPK cascade	2	sp|P67779|PHB_RAT, sp|P12346|TRFE_RAT
GO:0006732	coenzyme metabolic process	2	sp|P42123|LDHB_RAT, sp|P47727|CBR1_RAT
GO:0006508	proteolysis	2	sp|P67779|PHB_RAT, sp|P06761|GRP78_RAT
GO:0030097	hemopoiesis	2	sp|P12346|TRFE_RAT, sp|P01946|HBA_RAT
GO:0031327	negative regulation of cellular biosynthetic process	2	sp|P67779|PHB_RAT, sp|P07483|FABPH_RAT
GO:0061515	myeloid cell development	2	sp|P01946|HBA_RAT, sp|P12346|TRFE_RAT
GO:0010563	negative regulation of phosphorus metabolic process	2	sp|P67779|PHB_RAT, sp|P07483|FABPH_RAT
GO:0001649	osteoblast differentiation	2	sp|P67779|PHB_RAT, sp|P12346|TRFE_RAT
GO:0009057	macromolecule catabolic process	2	sp|P67779|PHB_RAT, sp|P06761|GRP78_RAT
GO:1902531	regulation of intracellular signal transduction	2	sp|P67779|PHB_RAT, sp|P12346|TRFE_RAT
GO:0051960	regulation of nervous system development	2	sp|P06761|GRP78_RAT, sp|P12346|TRFE_RAT
GO:0010720	positive regulation of cell development	2	sp|P06761|GRP78_RAT, sp|P12346|TRFE_RAT
GO:0007167	enzyme linked receptor protein signaling pathway	2	sp|P06761|GRP78_RAT, sp|P12346|TRFE_RAT
GO:0072521	purine-containing compound metabolic process	2	sp|P67779|PHB_RAT, sp|P42123|LDHB_RAT
GO:0051248	negative regulation of protein metabolic process	2	sp|P67779|PHB_RAT, sp|P07483|FABPH_RAT
GO:0060429	epithelium development	2	sp|P67779|PHB_RAT, sp|P47727|CBR1_RAT
GO:0061458	reproductive system development	2	sp|P67779|PHB_RAT, sp|P06761|GRP78_RAT
GO:0006259	DNA metabolic process	2	sp|P67779|PHB_RAT, tr|D3Z8I7|D3Z8I7_RAT
GO:0034613	cellular protein localization	2	sp|P67779|PHB_RAT, sp|P06761|GRP78_RAT
GO:0008610	lipid biosynthetic process	2	sp|P07483|FABPH_RAT, sp|P47727|CBR1_RAT
GO:0045934	negative regulation of nucleobase-containing compound metabolic process	2	sp|P67779|PHB_RAT, sp|P07483|FABPH_RAT
GO:0051336	regulation of hydrolase activity	2	sp|P06761|GRP78_RAT, sp|P12346|TRFE_RAT
GO:0007010	cytoskeleton organization	2	sp|P06761|GRP78_RAT, sp|P12346|TRFE_RAT
GO:0005996	monosaccharide metabolic process	2	sp|P06761|GRP78_RAT, sp|P42123|LDHB_RAT
GO:1901617	organic hydroxy compound biosynthetic process	2	sp|P42123|LDHB_RAT, sp|P47727|CBR1_RAT
GO:0019693	ribose phosphate metabolic process	2	sp|P67779|PHB_RAT, sp|P42123|LDHB_RAT
GO:0009116	nucleoside metabolic process	2	sp|P67779|PHB_RAT, sp|P42123|LDHB_RAT
GO:0016053	organic acid biosynthetic process	2	sp|P42123|LDHB_RAT, sp|P47727|CBR1_RAT
GO:0050727	regulation of inflammatory response	2	sp|P67779|PHB_RAT, sp|P07483|FABPH_RAT
GO:0007417	central nervous system development	2	sp|P06761|GRP78_RAT, sp|P07483|FABPH_RAT
GO:0030163	protein catabolic process	2	sp|P67779|PHB_RAT, sp|P06761|GRP78_RAT
GO:0043086	negative regulation of catalytic activity	2	sp|P07483|FABPH_RAT, sp|P12346|TRFE_RAT
GO:0006880	intracellular sequestering of iron ion	2	sp|P19132|FRIH_RAT, sp|P02793|FRIL1_RAT
GO:0002009	morphogenesis of an epithelium	1	sp|P67779|PHB_RAT
GO:0021846	cell proliferation in forebrain	1	sp|P07483|FABPH_RAT
GO:1900159	positive regulation of bone mineralization involved in bone maturation	1	sp|P12346|TRFE_RAT
GO:0072524	pyridine-containing compound metabolic process	1	sp|P42123|LDHB_RAT
GO:0090092	regulation of transmembrane receptor protein serine/threonine kinase signaling pathway	1	sp|P06761|GRP78_RAT
GO:0043434	response to peptide hormone	1	sp|P07483|FABPH_RAT
GO:0000278	mitotic cell cycle	1	sp|P67779|PHB_RAT
GO:1903844	regulation of cellular response to transforming growth factor beta stimulus	1	sp|P06761|GRP78_RAT
GO:1902106	negative regulation of leukocyte differentiation	1	sp|P12346|TRFE_RAT
GO:0044272	sulfur compound biosynthetic process	1	tr|D3Z8I7|D3Z8I7_RAT
GO:0051339	regulation of lyase activity	1	sp|P19132|FRIH_RAT
GO:0021577	hindbrain structural organization	1	sp|P06761|GRP78_RAT
GO:0021589	cerebellum structural organization	1	sp|P06761|GRP78_RAT
GO:0008366	axon ensheathment	1	sp|P12346|TRFE_RAT
GO:0019058	viral life cycle	1	sp|P12346|TRFE_RAT
GO:0007569	cell aging	1	sp|P67779|PHB_RAT
GO:0036499	PERK-mediated unfolded protein response	1	sp|P06761|GRP78_RAT
GO:0017038	protein import	1	sp|P67779|PHB_RAT
GO:0009723	response to ethylene	1	sp|P67779|PHB_RAT
GO:1904229	regulation of succinate dehydrogenase activity	1	sp|P19132|FRIH_RAT
GO:0071456	cellular response to hypoxia	1	sp|P67779|PHB_RAT
GO:0002227	innate immune response in mucosa	1	sp|P12346|TRFE_RAT
GO:0006066	alcohol metabolic process	1	sp|P47727|CBR1_RAT
GO:0008299	isoprenoid biosynthetic process	1	sp|P47727|CBR1_RAT
GO:0045745	positive regulation of G-protein coupled receptor protein signaling pathway	1	sp|P67779|PHB_RAT
GO:0060904	regulation of protein folding in endoplasmic reticulum	1	sp|P06761|GRP78_RAT
GO:0070302	regulation of stress-activated protein kinase signaling cascade	1	sp|P12346|TRFE_RAT
GO:0050729	positive regulation of inflammatory response	1	sp|P07483|FABPH_RAT
GO:0010565	regulation of cellular ketone metabolic process	1	sp|P07483|FABPH_RAT
GO:0044282	small molecule catabolic process	1	sp|P47727|CBR1_RAT
GO:1903901	negative regulation of viral life cycle	1	sp|P12346|TRFE_RAT
GO:0001501	skeletal system development	1	sp|P12346|TRFE_RAT
GO:0009733	response to auxin	1	sp|P67779|PHB_RAT
GO:0070167	regulation of biomineral tissue development	1	sp|P12346|TRFE_RAT
GO:0031098	stress-activated protein kinase signaling cascade	1	sp|P12346|TRFE_RAT
GO:0000302	response to reactive oxygen species	1	sp|P67779|PHB_RAT
GO:0090101	negative regulation of transmembrane receptor protein serine/threonine kinase signaling pathway	1	sp|P06761|GRP78_RAT
GO:1902732	positive regulation of chondrocyte proliferation	1	sp|P12346|TRFE_RAT
GO:0048232	male gamete generation	1	sp|P67779|PHB_RAT
GO:0048477	oogenesis	1	sp|P67779|PHB_RAT
GO:0031669	cellular response to nutrient levels	1	sp|P06761|GRP78_RAT
GO:0016051	carbohydrate biosynthetic process	1	sp|P42123|LDHB_RAT
GO:0008277	regulation of G-protein coupled receptor protein signaling pathway	1	sp|P67779|PHB_RAT
GO:0046890	regulation of lipid biosynthetic process	1	sp|P07483|FABPH_RAT
GO:0031175	neuron projection development	1	sp|P06761|GRP78_RAT
GO:0045667	regulation of osteoblast differentiation	1	sp|P12346|TRFE_RAT
GO:0070977	bone maturation	1	sp|P12346|TRFE_RAT
GO:0034145	positive regulation of toll-like receptor 4 signaling pathway	1	sp|P12346|TRFE_RAT
GO:0031644	regulation of neurological system process	1	sp|P12346|TRFE_RAT
GO:0002164	larval development	1	sp|P06761|GRP78_RAT
GO:1904231	positive regulation of succinate dehydrogenase activity	1	sp|P19132|FRIH_RAT
GO:0042176	regulation of protein catabolic process	1	sp|P67779|PHB_RAT
GO:0072594	establishment of protein localization to organelle	1	sp|P67779|PHB_RAT
GO:0045088	regulation of innate immune response	1	sp|P12346|TRFE_RAT
GO:0006886	intracellular protein transport	1	sp|P67779|PHB_RAT
GO:0048147	negative regulation of fibroblast proliferation	1	sp|P19132|FRIH_RAT
GO:1902105	regulation of leukocyte differentiation	1	sp|P12346|TRFE_RAT
GO:0030334	regulation of cell migration	1	sp|P06761|GRP78_RAT
GO:0016042	lipid catabolic process	1	sp|P07483|FABPH_RAT
GO:0046486	glycerolipid metabolic process	1	sp|P07483|FABPH_RAT
GO:0070584	mitochondrion morphogenesis	1	sp|P67779|PHB_RAT
GO:1901570	fatty acid derivative biosynthetic process	1	sp|P47727|CBR1_RAT
GO:0034976	response to endoplasmic reticulum stress	1	sp|P06761|GRP78_RAT
GO:0006869	lipid transport	1	sp|P07483|FABPH_RAT
GO:0010259	multicellular organism aging	1	sp|P67779|PHB_RAT
GO:2001205	negative regulation of osteoclast development	1	sp|P12346|TRFE_RAT
GO:0033598	mammary gland epithelial cell proliferation	1	sp|P67779|PHB_RAT
GO:0051591	response to cAMP	1	sp|P12346|TRFE_RAT
GO:0002920	regulation of humoral immune response	1	sp|P67779|PHB_RAT
GO:0009651	response to salt stress	1	sp|P67779|PHB_RAT
GO:0071417	cellular response to organonitrogen compound	1	sp|P12346|TRFE_RAT
GO:0015849	organic acid transport	1	sp|P07483|FABPH_RAT
GO:0002922	positive regulation of humoral immune response	1	sp|P67779|PHB_RAT
GO:0006690	icosanoid metabolic process	1	sp|P47727|CBR1_RAT
GO:0032507	maintenance of protein location in cell	1	sp|P06761|GRP78_RAT
GO:0043467	regulation of generation of precursor metabolites and energy	1	sp|P67779|PHB_RAT
GO:0046850	regulation of bone remodeling	1	sp|P12346|TRFE_RAT
GO:0009820	alkaloid metabolic process	1	sp|P47727|CBR1_RAT
GO:1900101	regulation of endoplasmic reticulum unfolded protein response	1	sp|P06761|GRP78_RAT
GO:0042692	muscle cell differentiation	1	sp|P02793|FRIL1_RAT
GO:0048799	animal organ maturation	1	sp|P12346|TRFE_RAT
GO:0044772	mitotic cell cycle phase transition	1	sp|P67779|PHB_RAT
GO:0006983	ER overload response	1	sp|P06761|GRP78_RAT
GO:0048754	branching morphogenesis of an epithelial tube	1	sp|P67779|PHB_RAT
GO:0007264	small GTPase mediated signal transduction	1	sp|P12346|TRFE_RAT
GO:0050680	negative regulation of epithelial cell proliferation	1	sp|P67779|PHB_RAT
GO:2000027	regulation of organ morphogenesis	1	sp|P67779|PHB_RAT
GO:0060249	anatomical structure homeostasis	1	sp|P12346|TRFE_RAT
GO:0006119	oxidative phosphorylation	1	sp|P67779|PHB_RAT
GO:0051646	mitochondrion localization	1	sp|P67779|PHB_RAT
GO:0046889	positive regulation of lipid biosynthetic process	1	sp|P07483|FABPH_RAT
GO:0046903	secretion	1	sp|P12346|TRFE_RAT
GO:0048705	skeletal system morphogenesis	1	sp|P12346|TRFE_RAT
GO:0032069	regulation of nuclease activity	1	sp|P06761|GRP78_RAT
GO:0032990	cell part morphogenesis	1	sp|P67779|PHB_RAT
GO:0045840	positive regulation of mitotic nuclear division	1	sp|P67779|PHB_RAT
GO:0030036	actin cytoskeleton organization	1	sp|P12346|TRFE_RAT
GO:0006109	regulation of carbohydrate metabolic process	1	sp|P06761|GRP78_RAT
GO:0071466	cellular response to xenobiotic stimulus	1	tr|D3Z8I7|D3Z8I7_RAT
GO:0046683	response to organophosphorus	1	sp|P12346|TRFE_RAT
GO:0016569	covalent chromatin modification	1	sp|P67779|PHB_RAT
GO:0030501	positive regulation of bone mineralization	1	sp|P12346|TRFE_RAT
GO:0033043	regulation of organelle organization	1	sp|P67779|PHB_RAT
GO:0043393	regulation of protein binding	1	sp|P06761|GRP78_RAT
GO:1903998	regulation of eating behavior	1	sp|P67779|PHB_RAT
GO:0060762	regulation of branching involved in mammary gland duct morphogenesis	1	sp|P67779|PHB_RAT
GO:0007249	I-kappaB kinase/NF-kappaB signaling	1	sp|P12346|TRFE_RAT
GO:1901661	quinone metabolic process	1	sp|P47727|CBR1_RAT
GO:0019730	antimicrobial humoral response	1	sp|P12346|TRFE_RAT
GO:0000819	sister chromatid segregation	1	sp|P67779|PHB_RAT
GO:0044265	cellular macromolecule catabolic process	1	sp|P06761|GRP78_RAT
GO:0044793	negative regulation by host of viral process	1	sp|P12346|TRFE_RAT
GO:0007088	regulation of mitotic nuclear division	1	sp|P67779|PHB_RAT
GO:0043931	ossification involved in bone maturation	1	sp|P12346|TRFE_RAT
GO:0044843	cell cycle G1/S phase transition	1	sp|P67779|PHB_RAT
GO:0006757	ATP generation from ADP	1	sp|P42123|LDHB_RAT
GO:0007346	regulation of mitotic cell cycle	1	sp|P67779|PHB_RAT
GO:0045931	positive regulation of mitotic cell cycle	1	sp|P67779|PHB_RAT
GO:1901605	alpha-amino acid metabolic process	1	sp|P42123|LDHB_RAT
GO:0031047	gene silencing by RNA	1	sp|P06761|GRP78_RAT
GO:1902582	single-organism intracellular transport	1	sp|P67779|PHB_RAT
GO:0036498	IRE1-mediated unfolded protein response	1	sp|P06761|GRP78_RAT
GO:0000096	sulfur amino acid metabolic process	1	sp|P42123|LDHB_RAT
GO:0010675	regulation of cellular carbohydrate metabolic process	1	sp|P06761|GRP78_RAT
GO:1901701	cellular response to oxygen-containing compound	1	sp|P12346|TRFE_RAT
GO:0036500	ATF6-mediated unfolded protein response	1	sp|P06761|GRP78_RAT
GO:0045638	negative regulation of myeloid cell differentiation	1	sp|P12346|TRFE_RAT
GO:0071706	tumor necrosis factor superfamily cytokine production	1	sp|P12346|TRFE_RAT
GO:0035967	cellular response to topologically incorrect protein	1	sp|P06761|GRP78_RAT
GO:0048872	homeostasis of number of cells	1	sp|P01946|HBA_RAT
GO:0045017	glycerolipid biosynthetic process	1	sp|P07483|FABPH_RAT
GO:0098751	bone cell development	1	sp|P12346|TRFE_RAT
GO:0051604	protein maturation	1	sp|P67779|PHB_RAT
GO:0007015	actin filament organization	1	sp|P12346|TRFE_RAT
GO:0060562	epithelial tube morphogenesis	1	sp|P67779|PHB_RAT
GO:0090407	organophosphate biosynthetic process	1	sp|P07483|FABPH_RAT
GO:0031664	regulation of lipopolysaccharide-mediated signaling pathway	1	sp|P12346|TRFE_RAT
GO:0071236	cellular response to antibiotic	1	sp|P06761|GRP78_RAT
GO:0031346	positive regulation of cell projection organization	1	sp|P06761|GRP78_RAT
GO:0051851	modification by host of symbiont morphology or physiology	1	sp|P12346|TRFE_RAT
GO:0001894	tissue homeostasis	1	sp|P12346|TRFE_RAT
GO:0071219	cellular response to molecule of bacterial origin	1	sp|P12346|TRFE_RAT
GO:0031663	lipopolysaccharide-mediated signaling pathway	1	sp|P12346|TRFE_RAT
GO:0015669	gas transport	1	sp|P01946|HBA_RAT
GO:1900228	regulation of single-species biofilm formation in or on host organism	1	sp|P12346|TRFE_RAT
GO:0048308	organelle inheritance	1	sp|P67779|PHB_RAT
GO:0051100	negative regulation of binding	1	sp|P06761|GRP78_RAT
GO:0007067	mitotic nuclear division	1	sp|P67779|PHB_RAT
GO:1903010	regulation of bone development	1	sp|P12346|TRFE_RAT
GO:1903900	regulation of viral life cycle	1	sp|P12346|TRFE_RAT
GO:0043401	steroid hormone mediated signaling pathway	1	sp|P67779|PHB_RAT
GO:0071731	response to nitric oxide	1	sp|P67779|PHB_RAT
GO:0060537	muscle tissue development	1	sp|P02793|FRIL1_RAT
GO:0016052	carbohydrate catabolic process	1	sp|P42123|LDHB_RAT
GO:0042196	chlorinated hydrocarbon metabolic process	1	tr|D3Z8I7|D3Z8I7_RAT
GO:0048145	regulation of fibroblast proliferation	1	sp|P19132|FRIH_RAT
GO:0048545	response to steroid hormone	1	sp|P67779|PHB_RAT
GO:0042182	ketone catabolic process	1	sp|P47727|CBR1_RAT
GO:0022622	root system development	1	sp|P67779|PHB_RAT
GO:1901987	regulation of cell cycle phase transition	1	sp|P67779|PHB_RAT
GO:0061138	morphogenesis of a branching epithelium	1	sp|P67779|PHB_RAT
GO:0050821	protein stabilization	1	sp|P67779|PHB_RAT
GO:0033144	negative regulation of intracellular steroid hormone receptor signaling pathway	1	sp|P67779|PHB_RAT
GO:1905330	regulation of morphogenesis of an epithelium	1	sp|P67779|PHB_RAT
GO:0009743	response to carbohydrate	1	sp|P47727|CBR1_RAT
GO:0007292	female gamete generation	1	sp|P67779|PHB_RAT
GO:1901687	glutathione derivative biosynthetic process	1	tr|D3Z8I7|D3Z8I7_RAT
GO:0002758	innate immune response-activating signal transduction	1	sp|P12346|TRFE_RAT
GO:0098542	defense response to other organism	1	sp|P12346|TRFE_RAT
GO:0070542	response to fatty acid	1	sp|P07483|FABPH_RAT
GO:0006089	lactate metabolic process	1	sp|P42123|LDHB_RAT
GO:0009267	cellular response to starvation	1	sp|P06761|GRP78_RAT
GO:2001245	regulation of phosphatidylcholine biosynthetic process	1	sp|P07483|FABPH_RAT
GO:0032075	positive regulation of nuclease activity	1	sp|P06761|GRP78_RAT
GO:0033599	regulation of mammary gland epithelial cell proliferation	1	sp|P67779|PHB_RAT
GO:0033143	regulation of intracellular steroid hormone receptor signaling pathway	1	sp|P67779|PHB_RAT
GO:1903556	negative regulation of tumor necrosis factor superfamily cytokine production	1	sp|P12346|TRFE_RAT
GO:0014074	response to purine-containing compound	1	sp|P12346|TRFE_RAT
GO:0048666	neuron development	1	sp|P06761|GRP78_RAT
GO:0002385	mucosal immune response	1	sp|P12346|TRFE_RAT
GO:0071560	cellular response to transforming growth factor beta stimulus	1	sp|P06761|GRP78_RAT
GO:0031665	negative regulation of lipopolysaccharide-mediated signaling pathway	1	sp|P12346|TRFE_RAT
GO:0046470	phosphatidylcholine metabolic process	1	sp|P07483|FABPH_RAT
GO:0031667	response to nutrient levels	1	sp|P06761|GRP78_RAT
GO:0033690	positive regulation of osteoblast proliferation	1	sp|P12346|TRFE_RAT
GO:1900229	negative regulation of single-species biofilm formation in or on host organism	1	sp|P12346|TRFE_RAT
GO:0008654	phospholipid biosynthetic process	1	sp|P07483|FABPH_RAT
GO:0050678	regulation of epithelial cell proliferation	1	sp|P67779|PHB_RAT
GO:0046852	positive regulation of bone remodeling	1	sp|P12346|TRFE_RAT
GO:0051276	chromosome organization	1	sp|P67779|PHB_RAT
GO:0010638	positive regulation of organelle organization	1	sp|P67779|PHB_RAT
GO:0045995	regulation of embryonic development	1	sp|P06761|GRP78_RAT
GO:0045637	regulation of myeloid cell differentiation	1	sp|P12346|TRFE_RAT
GO:0030100	regulation of endocytosis	1	sp|P12346|TRFE_RAT
GO:0034698	response to gonadotropin	1	sp|P12346|TRFE_RAT
GO:0043603	cellular amide metabolic process	1	tr|D3Z8I7|D3Z8I7_RAT
GO:0051707	response to other organism	1	sp|P12346|TRFE_RAT
GO:0030335	positive regulation of cell migration	1	sp|P06761|GRP78_RAT
GO:0030449	regulation of complement activation	1	sp|P67779|PHB_RAT
GO:0046543	development of secondary female sexual characteristics	1	sp|P67779|PHB_RAT
GO:0030518	intracellular steroid hormone receptor signaling pathway	1	sp|P67779|PHB_RAT
GO:0070444	oligodendrocyte progenitor proliferation	1	sp|P12346|TRFE_RAT
GO:0006720	isoprenoid metabolic process	1	sp|P47727|CBR1_RAT
GO:1903727	positive regulation of phospholipid metabolic process	1	sp|P07483|FABPH_RAT
GO:0044010	single-species biofilm formation	1	sp|P12346|TRFE_RAT
GO:0033688	regulation of osteoblast proliferation	1	sp|P12346|TRFE_RAT
GO:1903555	regulation of tumor necrosis factor superfamily cytokine production	1	sp|P12346|TRFE_RAT
GO:0044242	cellular lipid catabolic process	1	sp|P07483|FABPH_RAT
GO:1901699	cellular response to nitrogen compound	1	sp|P12346|TRFE_RAT
GO:2000177	regulation of neural precursor cell proliferation	1	sp|P12346|TRFE_RAT
GO:0042177	negative regulation of protein catabolic process	1	sp|P67779|PHB_RAT
GO:0022612	gland morphogenesis	1	sp|P67779|PHB_RAT
GO:0007006	mitochondrial membrane organization	1	sp|P67779|PHB_RAT
GO:0006766	vitamin metabolic process	1	sp|P47727|CBR1_RAT
GO:0044724	single-organism carbohydrate catabolic process	1	sp|P42123|LDHB_RAT
GO:0055001	muscle cell development	1	sp|P02793|FRIL1_RAT
GO:0031214	biomineral tissue development	1	sp|P12346|TRFE_RAT
GO:0006987	activation of signaling protein activity involved in unfolded protein response	1	sp|P06761|GRP78_RAT
GO:0036293	response to decreased oxygen levels	1	sp|P67779|PHB_RAT
GO:0060134	prepulse inhibition	1	sp|P07483|FABPH_RAT
GO:2000179	positive regulation of neural precursor cell proliferation	1	sp|P12346|TRFE_RAT
GO:0030258	lipid modification	1	sp|P07483|FABPH_RAT
GO:0051169	nuclear transport	1	sp|P67779|PHB_RAT
GO:0030433	ER-associated ubiquitin-dependent protein catabolic process	1	sp|P06761|GRP78_RAT
GO:0002237	response to molecule of bacterial origin	1	sp|P12346|TRFE_RAT
GO:0031023	microtubule organizing center organization	1	sp|P06761|GRP78_RAT
GO:0045669	positive regulation of osteoblast differentiation	1	sp|P12346|TRFE_RAT
GO:0030218	erythrocyte differentiation	1	sp|P01946|HBA_RAT
GO:0034121	regulation of toll-like receptor signaling pathway	1	sp|P12346|TRFE_RAT
GO:0043620	regulation of DNA-templated transcription in response to stress	1	sp|P06761|GRP78_RAT
GO:0006986	response to unfolded protein	1	sp|P06761|GRP78_RAT
GO:0071453	cellular response to oxygen levels	1	sp|P67779|PHB_RAT
GO:0050905	neuromuscular process	1	sp|P07483|FABPH_RAT
GO:1902532	negative regulation of intracellular signal transduction	1	sp|P67779|PHB_RAT
GO:0006644	phospholipid metabolic process	1	sp|P07483|FABPH_RAT
GO:0030421	defecation	1	sp|P67779|PHB_RAT
GO:0010721	negative regulation of cell development	1	sp|P12346|TRFE_RAT
GO:0006518	peptide metabolic process	1	tr|D3Z8I7|D3Z8I7_RAT
GO:0048285	organelle fission	1	sp|P67779|PHB_RAT
GO:0051187	cofactor catabolic process	1	sp|P47727|CBR1_RAT
GO:0030879	mammary gland development	1	sp|P67779|PHB_RAT
GO:0019079	viral genome replication	1	sp|P12346|TRFE_RAT
GO:0019216	regulation of lipid metabolic process	1	sp|P07483|FABPH_RAT
GO:0046849	bone remodeling	1	sp|P12346|TRFE_RAT
GO:0048260	positive regulation of receptor-mediated endocytosis	1	sp|P12346|TRFE_RAT
GO:1901998	toxin transport	1	sp|P06761|GRP78_RAT
GO:0007005	mitochondrion organization	1	sp|P67779|PHB_RAT
GO:0098657	import into cell	1	sp|P12346|TRFE_RAT
GO:0030500	regulation of bone mineralization	1	sp|P12346|TRFE_RAT
GO:0050890	cognition	1	sp|P47727|CBR1_RAT
GO:0070848	response to growth factor	1	sp|P06761|GRP78_RAT
GO:0045917	positive regulation of complement activation	1	sp|P67779|PHB_RAT
GO:0006749	glutathione metabolic process	1	tr|D3Z8I7|D3Z8I7_RAT
GO:0048528	post-embryonic root development	1	sp|P67779|PHB_RAT
GO:0034440	lipid oxidation	1	sp|P07483|FABPH_RAT
GO:0060349	bone morphogenesis	1	sp|P12346|TRFE_RAT
GO:0021762	substantia nigra development	1	sp|P06761|GRP78_RAT
GO:0016441	posttranscriptional gene silencing	1	sp|P06761|GRP78_RAT
GO:0030282	bone mineralization	1	sp|P12346|TRFE_RAT
GO:0032496	response to lipopolysaccharide	1	sp|P12346|TRFE_RAT
GO:0007517	muscle organ development	1	sp|P02793|FRIL1_RAT
GO:0045089	positive regulation of innate immune response	1	sp|P12346|TRFE_RAT
GO:0006638	neutral lipid metabolic process	1	sp|P07483|FABPH_RAT
GO:0043050	pharyngeal pumping	1	sp|P67779|PHB_RAT
GO:1901652	response to peptide	1	sp|P07483|FABPH_RAT
GO:0006887	exocytosis	1	sp|P12346|TRFE_RAT
GO:0031344	regulation of cell projection organization	1	sp|P06761|GRP78_RAT
GO:1901989	positive regulation of cell cycle phase transition	1	sp|P67779|PHB_RAT
GO:1903845	negative regulation of cellular response to transforming growth factor beta stimulus	1	sp|P06761|GRP78_RAT
GO:0016192	vesicle-mediated transport	1	sp|P12346|TRFE_RAT
GO Distribution by Level (6)
GO-id	GO-term	#Seqs	Seqs
GO:0016310	phosphorylation	5	sp|P67779|PHB_RAT, sp|P06761|GRP78_RAT, sp|P07483|FABPH_RAT, sp|P42123|LDHB_RAT, sp|P12346|TRFE_RAT
GO:0032774	RNA biosynthetic process	4	sp|P67779|PHB_RAT, sp|P06761|GRP78_RAT, sp|P07483|FABPH_RAT, sp|P12346|TRFE_RAT
GO:0006464	cellular protein modification process	4	sp|P67779|PHB_RAT, sp|P06761|GRP78_RAT, sp|P07483|FABPH_RAT, sp|P12346|TRFE_RAT
GO:2000112	regulation of cellular macromolecule biosynthetic process	4	sp|P67779|PHB_RAT, sp|P06761|GRP78_RAT, sp|P07483|FABPH_RAT, sp|P12346|TRFE_RAT
GO:0006351	transcription, DNA-templated	4	sp|P67779|PHB_RAT, sp|P06761|GRP78_RAT, sp|P07483|FABPH_RAT, sp|P12346|TRFE_RAT
GO:2001141	regulation of RNA biosynthetic process	4	sp|P67779|PHB_RAT, sp|P06761|GRP78_RAT, sp|P07483|FABPH_RAT, sp|P12346|TRFE_RAT
GO:0006355	regulation of transcription, DNA-templated	4	sp|P67779|PHB_RAT, sp|P06761|GRP78_RAT, sp|P07483|FABPH_RAT, sp|P12346|TRFE_RAT
GO:0031399	regulation of protein modification process	4	sp|P67779|PHB_RAT, sp|P06761|GRP78_RAT, sp|P07483|FABPH_RAT, sp|P12346|TRFE_RAT
GO:0050801	ion homeostasis	4	sp|P19132|FRIH_RAT, sp|P07483|FABPH_RAT, sp|P02793|FRIL1_RAT, sp|P12346|TRFE_RAT
GO:0045937	positive regulation of phosphate metabolic process	4	sp|P67779|PHB_RAT, sp|P06761|GRP78_RAT, sp|P07483|FABPH_RAT, sp|P12346|TRFE_RAT
GO:0019220	regulation of phosphate metabolic process	4	sp|P67779|PHB_RAT, sp|P06761|GRP78_RAT, sp|P07483|FABPH_RAT, sp|P12346|TRFE_RAT
GO:0043066	negative regulation of apoptotic process	3	sp|P67779|PHB_RAT, sp|P06761|GRP78_RAT, sp|P12346|TRFE_RAT
GO:0031401	positive regulation of protein modification process	3	sp|P67779|PHB_RAT, sp|P06761|GRP78_RAT, sp|P12346|TRFE_RAT
GO:0022008	neurogenesis	3	sp|P06761|GRP78_RAT, sp|P07483|FABPH_RAT, sp|P12346|TRFE_RAT
GO:0006812	cation transport	3	sp|P19132|FRIH_RAT, sp|P02793|FRIL1_RAT, sp|P12346|TRFE_RAT
GO:0045893	positive regulation of transcription, DNA-templated	3	sp|P67779|PHB_RAT, sp|P06761|GRP78_RAT, sp|P12346|TRFE_RAT
GO:0042981	regulation of apoptotic process	3	sp|P67779|PHB_RAT, sp|P06761|GRP78_RAT, sp|P12346|TRFE_RAT
GO:0006873	cellular ion homeostasis	3	sp|P19132|FRIH_RAT, sp|P02793|FRIL1_RAT, sp|P12346|TRFE_RAT
GO:1902680	positive regulation of RNA biosynthetic process	3	sp|P67779|PHB_RAT, sp|P06761|GRP78_RAT, sp|P12346|TRFE_RAT
GO:0009792	embryo development ending in birth or egg hatching	3	sp|P67779|PHB_RAT, sp|P06761|GRP78_RAT, sp|P01946|HBA_RAT
GO:0006915	apoptotic process	3	sp|P67779|PHB_RAT, sp|P06761|GRP78_RAT, sp|P12346|TRFE_RAT
GO:0043549	regulation of kinase activity	3	sp|P06761|GRP78_RAT, sp|P07483|FABPH_RAT, sp|P12346|TRFE_RAT
GO:0071248	cellular response to metal ion	3	sp|P06761|GRP78_RAT, sp|P07483|FABPH_RAT, sp|P12346|TRFE_RAT
GO:0019752	carboxylic acid metabolic process	3	sp|P07483|FABPH_RAT, sp|P42123|LDHB_RAT, sp|P47727|CBR1_RAT
GO:0071345	cellular response to cytokine stimulus	3	sp|P67779|PHB_RAT, sp|P06761|GRP78_RAT, sp|P07483|FABPH_RAT
GO:0045936	negative regulation of phosphate metabolic process	2	sp|P67779|PHB_RAT, sp|P07483|FABPH_RAT
GO:0007178	transmembrane receptor protein serine/threonine kinase signaling pathway	2	sp|P06761|GRP78_RAT, sp|P12346|TRFE_RAT
GO:0031400	negative regulation of protein modification process	2	sp|P67779|PHB_RAT, sp|P07483|FABPH_RAT
GO:0070371	ERK1 and ERK2 cascade	2	sp|P67779|PHB_RAT, sp|P12346|TRFE_RAT
GO:0071396	cellular response to lipid	2	sp|P67779|PHB_RAT, sp|P12346|TRFE_RAT
GO:0042278	purine nucleoside metabolic process	2	sp|P67779|PHB_RAT, sp|P42123|LDHB_RAT
GO:0045892	negative regulation of transcription, DNA-templated	2	sp|P67779|PHB_RAT, sp|P07483|FABPH_RAT
GO:0009117	nucleotide metabolic process	2	sp|P67779|PHB_RAT, sp|P42123|LDHB_RAT
GO:0006163	purine nucleotide metabolic process	2	sp|P67779|PHB_RAT, sp|P42123|LDHB_RAT
GO:0043408	regulation of MAPK cascade	2	sp|P67779|PHB_RAT, sp|P12346|TRFE_RAT
GO:0030099	myeloid cell differentiation	2	sp|P01946|HBA_RAT, sp|P12346|TRFE_RAT
GO:1902679	negative regulation of RNA biosynthetic process	2	sp|P67779|PHB_RAT, sp|P07483|FABPH_RAT
GO:0009119	ribonucleoside metabolic process	2	sp|P67779|PHB_RAT, sp|P42123|LDHB_RAT
GO:0071407	cellular response to organic cyclic compound	2	sp|P67779|PHB_RAT, sp|P12346|TRFE_RAT
GO:0043410	positive regulation of MAPK cascade	2	sp|P67779|PHB_RAT, sp|P12346|TRFE_RAT
GO:0009141	nucleoside triphosphate metabolic process	2	sp|P67779|PHB_RAT, sp|P42123|LDHB_RAT
GO:0002526	acute inflammatory response	2	sp|P67779|PHB_RAT, sp|P12346|TRFE_RAT
GO:0033365	protein localization to organelle	2	sp|P67779|PHB_RAT, sp|P06761|GRP78_RAT
GO:0045444	fat cell differentiation	2	sp|P07483|FABPH_RAT, sp|Q8VIF7|SBP1_RAT
GO:0019318	hexose metabolic process	2	sp|P06761|GRP78_RAT, sp|P42123|LDHB_RAT
GO:0046394	carboxylic acid biosynthetic process	2	sp|P42123|LDHB_RAT, sp|P47727|CBR1_RAT
GO:0009259	ribonucleotide metabolic process	2	sp|P67779|PHB_RAT, sp|P42123|LDHB_RAT
GO:0051347	positive regulation of transferase activity	2	sp|P06761|GRP78_RAT, sp|P12346|TRFE_RAT
GO:0050767	regulation of neurogenesis	2	sp|P06761|GRP78_RAT, sp|P12346|TRFE_RAT
GO:2000113	negative regulation of cellular macromolecule biosynthetic process	2	sp|P67779|PHB_RAT, sp|P07483|FABPH_RAT
GO:0009123	nucleoside monophosphate metabolic process	2	sp|P67779|PHB_RAT, sp|P42123|LDHB_RAT
GO:0045453	bone resorption	1	sp|P12346|TRFE_RAT
GO:0051603	proteolysis involved in cellular protein catabolic process	1	sp|P06761|GRP78_RAT
GO:0042149	cellular response to glucose starvation	1	sp|P06761|GRP78_RAT
GO:0035630	bone mineralization involved in bone maturation	1	sp|P12346|TRFE_RAT
GO:0060603	mammary gland duct morphogenesis	1	sp|P67779|PHB_RAT
GO:0006775	fat-soluble vitamin metabolic process	1	sp|P47727|CBR1_RAT
GO:0070670	response to interleukin-4	1	sp|P06761|GRP78_RAT
GO:0045666	positive regulation of neuron differentiation	1	sp|P06761|GRP78_RAT
GO:0070741	response to interleukin-6	1	sp|P67779|PHB_RAT
GO:0019362	pyridine nucleotide metabolic process	1	sp|P42123|LDHB_RAT
GO:0006605	protein targeting	1	sp|P67779|PHB_RAT
GO:0000280	nuclear division	1	sp|P67779|PHB_RAT
GO:2000308	negative regulation of tumor necrosis factor (ligand) superfamily member 11 production	1	sp|P12346|TRFE_RAT
GO:0071222	cellular response to lipopolysaccharide	1	sp|P12346|TRFE_RAT
GO:0071073	positive regulation of phospholipid biosynthetic process	1	sp|P07483|FABPH_RAT
GO:0006692	prostanoid metabolic process	1	sp|P47727|CBR1_RAT
GO:0010042	response to manganese ion	1	sp|P06761|GRP78_RAT
GO:0006721	terpenoid metabolic process	1	sp|P47727|CBR1_RAT
GO:0046165	alcohol biosynthetic process	1	sp|P47727|CBR1_RAT
GO:0060765	regulation of androgen receptor signaling pathway	1	sp|P67779|PHB_RAT
GO:0006913	nucleocytoplasmic transport	1	sp|P67779|PHB_RAT
GO:0006633	fatty acid biosynthetic process	1	sp|P47727|CBR1_RAT
GO:0019233	sensory perception of pain	1	sp|P67779|PHB_RAT
GO:0046461	neutral lipid catabolic process	1	sp|P07483|FABPH_RAT
GO:1990440	positive regulation of transcription from RNA polymerase II promoter in response to endoplasmic reticulum stress	1	sp|P06761|GRP78_RAT
GO:0015671	oxygen transport	1	sp|P01946|HBA_RAT
GO:0006304	DNA modification	1	tr|D3Z8I7|D3Z8I7_RAT
GO:0042374	phylloquinone metabolic process	1	sp|P47727|CBR1_RAT
GO:0040029	regulation of gene expression, epigenetic	1	sp|P06761|GRP78_RAT
GO:0006650	glycerophospholipid metabolic process	1	sp|P07483|FABPH_RAT
GO:0032680	regulation of tumor necrosis factor production	1	sp|P12346|TRFE_RAT
GO:0010976	positive regulation of neuron projection development	1	sp|P06761|GRP78_RAT
GO:0043409	negative regulation of MAPK cascade	1	sp|P67779|PHB_RAT
GO:0051348	negative regulation of transferase activity	1	sp|P07483|FABPH_RAT
GO:0009132	nucleoside diphosphate metabolic process	1	sp|P42123|LDHB_RAT
GO:0000001	mitochondrion inheritance	1	sp|P67779|PHB_RAT
GO:0019395	fatty acid oxidation	1	sp|P07483|FABPH_RAT
GO:0001676	long-chain fatty acid metabolic process	1	sp|P47727|CBR1_RAT
GO:0007007	inner mitochondrial membrane organization	1	sp|P67779|PHB_RAT
GO:0051346	negative regulation of hydrolase activity	1	sp|P12346|TRFE_RAT
GO:2000307	regulation of tumor necrosis factor (ligand) superfamily member 11 production	1	sp|P12346|TRFE_RAT
GO:0017015	regulation of transforming growth factor beta receptor signaling pathway	1	sp|P06761|GRP78_RAT
GO:0010498	proteasomal protein catabolic process	1	sp|P06761|GRP78_RAT
GO:0006639	acylglycerol metabolic process	1	sp|P07483|FABPH_RAT
GO:0060766	negative regulation of androgen receptor signaling pathway	1	sp|P67779|PHB_RAT
GO:1901662	quinone catabolic process	1	sp|P47727|CBR1_RAT
GO:0070445	regulation of oligodendrocyte progenitor proliferation	1	sp|P12346|TRFE_RAT
GO:0060538	skeletal muscle organ development	1	sp|P02793|FRIL1_RAT
GO:0016485	protein processing	1	sp|P67779|PHB_RAT
GO:0032640	tumor necrosis factor production	1	sp|P12346|TRFE_RAT
GO:0072535	tumor necrosis factor (ligand) superfamily member 11 production	1	sp|P12346|TRFE_RAT
GO:2000322	regulation of glucocorticoid receptor signaling pathway	1	sp|P67779|PHB_RAT
GO:0048821	erythrocyte development	1	sp|P01946|HBA_RAT
GO:0050832	defense response to fungus	1	sp|P12346|TRFE_RAT
GO:0006691	leukotriene metabolic process	1	sp|P47727|CBR1_RAT
GO:0001302	replicative cell aging	1	sp|P67779|PHB_RAT
GO:0042695	thelarche	1	sp|P67779|PHB_RAT
GO:1900157	regulation of bone mineralization involved in bone maturation	1	sp|P12346|TRFE_RAT
GO:0009620	response to fungus	1	sp|P12346|TRFE_RAT
GO:0014706	striated muscle tissue development	1	sp|P02793|FRIL1_RAT
GO:1903897	regulation of PERK-mediated unfolded protein response	1	sp|P06761|GRP78_RAT
GO:0032868	response to insulin	1	sp|P07483|FABPH_RAT
GO:0070304	positive regulation of stress-activated protein kinase signaling cascade	1	sp|P12346|TRFE_RAT
GO:0006140	regulation of nucleotide metabolic process	1	sp|P67779|PHB_RAT
GO:0051403	stress-activated MAPK cascade	1	sp|P12346|TRFE_RAT
GO:1903891	regulation of ATF6-mediated unfolded protein response	1	sp|P06761|GRP78_RAT
GO:0071320	cellular response to cAMP	1	sp|P12346|TRFE_RAT
GO:0034143	regulation of toll-like receptor 4 signaling pathway	1	sp|P12346|TRFE_RAT
GO:0007283	spermatogenesis	1	sp|P67779|PHB_RAT
GO:0046364	monosaccharide biosynthetic process	1	sp|P42123|LDHB_RAT
GO:0033147	negative regulation of intracellular estrogen receptor signaling pathway	1	sp|P67779|PHB_RAT
GO:0048311	mitochondrion distribution	1	sp|P67779|PHB_RAT
GO:0051349	positive regulation of lyase activity	1	sp|P19132|FRIH_RAT
GO:0045071	negative regulation of viral genome replication	1	sp|P12346|TRFE_RAT
GO:0045862	positive regulation of proteolysis	1	sp|P67779|PHB_RAT
GO:0030855	epithelial cell differentiation	1	sp|P47727|CBR1_RAT
GO:1903894	regulation of IRE1-mediated unfolded protein response	1	sp|P06761|GRP78_RAT
GO:0007096	regulation of exit from mitosis	1	sp|P67779|PHB_RAT
GO:0036294	cellular response to decreased oxygen levels	1	sp|P67779|PHB_RAT
GO:0006096	glycolytic process	1	sp|P42123|LDHB_RAT
GO:1903319	positive regulation of protein maturation	1	sp|P67779|PHB_RAT
GO:0046942	carboxylic acid transport	1	sp|P07483|FABPH_RAT
GO:1903317	regulation of protein maturation	1	sp|P67779|PHB_RAT
GO:0045069	regulation of viral genome replication	1	sp|P12346|TRFE_RAT
GO:0044744	protein targeting to nucleus	1	sp|P67779|PHB_RAT
GO:0014015	positive regulation of gliogenesis	1	sp|P12346|TRFE_RAT
GO:0016114	terpenoid biosynthetic process	1	sp|P47727|CBR1_RAT
GO:0002082	regulation of oxidative phosphorylation	1	sp|P67779|PHB_RAT
GO:0050954	sensory perception of mechanical stimulus	1	sp|P02793|FRIL1_RAT
GO:0071071	regulation of phospholipid biosynthetic process	1	sp|P07483|FABPH_RAT
GO:0035194	posttranscriptional gene silencing by RNA	1	sp|P06761|GRP78_RAT
GO:0009069	serine family amino acid metabolic process	1	sp|P42123|LDHB_RAT
GO:0010226	response to lithium ion	1	sp|P07483|FABPH_RAT
GO:0050847	progesterone receptor signaling pathway	1	sp|P67779|PHB_RAT
GO:0043496	regulation of protein homodimerization activity	1	sp|P06761|GRP78_RAT
GO:0051220	cytoplasmic sequestering of protein	1	sp|P06761|GRP78_RAT
GO:0002673	regulation of acute inflammatory response	1	sp|P67779|PHB_RAT
GO:0071383	cellular response to steroid hormone stimulus	1	sp|P67779|PHB_RAT
GO:0099587	inorganic ion import into cell	1	sp|P12346|TRFE_RAT
GO:0010608	posttranscriptional regulation of gene expression	1	sp|P06761|GRP78_RAT
GO:0006897	endocytosis	1	sp|P12346|TRFE_RAT
GO:0002762	negative regulation of myeloid leukocyte differentiation	1	sp|P12346|TRFE_RAT
GO:0019249	lactate biosynthetic process	1	sp|P42123|LDHB_RAT
GO:0009109	coenzyme catabolic process	1	sp|P47727|CBR1_RAT
GO:0009617	response to bacterium	1	sp|P12346|TRFE_RAT
GO:0032872	regulation of stress-activated MAPK cascade	1	sp|P12346|TRFE_RAT
GO:0071371	cellular response to gonadotropin stimulus	1	sp|P12346|TRFE_RAT
GO:0045055	regulated exocytosis	1	sp|P12346|TRFE_RAT
GO:0036035	osteoclast development	1	sp|P12346|TRFE_RAT
GO:1901990	regulation of mitotic cell cycle phase transition	1	sp|P67779|PHB_RAT
GO:0006733	oxidoreduction coenzyme metabolic process	1	sp|P42123|LDHB_RAT
GO:0051345	positive regulation of hydrolase activity	1	sp|P06761|GRP78_RAT
GO:0072595	maintenance of protein localization in organelle	1	sp|P06761|GRP78_RAT
GO:0018900	dichloromethane metabolic process	1	tr|D3Z8I7|D3Z8I7_RAT
GO:0043618	regulation of transcription from RNA polymerase II promoter in response to stress	1	sp|P06761|GRP78_RAT
GO:0035634	response to stilbenoid	1	sp|P01946|HBA_RAT
GO:0002221	pattern recognition receptor signaling pathway	1	sp|P12346|TRFE_RAT
GO:0006820	anion transport	1	sp|P07483|FABPH_RAT
GO:0034612	response to tumor necrosis factor	1	sp|P07483|FABPH_RAT
GO:0019369	arachidonic acid metabolic process	1	sp|P47727|CBR1_RAT
GO:2000323	negative regulation of glucocorticoid receptor signaling pathway	1	sp|P67779|PHB_RAT
GO:0033146	regulation of intracellular estrogen receptor signaling pathway	1	sp|P67779|PHB_RAT
GO:0010975	regulation of neuron projection development	1	sp|P06761|GRP78_RAT
GO:1902808	positive regulation of cell cycle G1/S phase transition	1	sp|P67779|PHB_RAT
GO:0033559	unsaturated fatty acid metabolic process	1	sp|P47727|CBR1_RAT
GO:0010458	exit from mitosis	1	sp|P67779|PHB_RAT
GO:0048527	lateral root development	1	sp|P67779|PHB_RAT
GO:0030182	neuron differentiation	1	sp|P06761|GRP78_RAT
GO:0015711	organic anion transport	1	sp|P07483|FABPH_RAT
GO:0098732	macromolecule deacylation	1	sp|P67779|PHB_RAT
GO:0016570	histone modification	1	sp|P67779|PHB_RAT
GO:0051785	positive regulation of nuclear division	1	sp|P67779|PHB_RAT
GO:0034620	cellular response to unfolded protein	1	sp|P06761|GRP78_RAT
GO:0006656	phosphatidylcholine biosynthetic process	1	sp|P07483|FABPH_RAT
GO:0051146	striated muscle cell differentiation	1	sp|P02793|FRIL1_RAT
GO:0010906	regulation of glucose metabolic process	1	sp|P06761|GRP78_RAT
GO:0042373	vitamin K metabolic process	1	sp|P47727|CBR1_RAT
GO:0042742	defense response to bacterium	1	sp|P12346|TRFE_RAT
GO:0030512	negative regulation of transforming growth factor beta receptor signaling pathway	1	sp|P06761|GRP78_RAT
GO:0033572	transferrin transport	1	sp|P12346|TRFE_RAT
GO:1904232	regulation of aconitate hydratase activity	1	sp|P19132|FRIH_RAT
GO:0019217	regulation of fatty acid metabolic process	1	sp|P07483|FABPH_RAT
GO:0030162	regulation of proteolysis	1	sp|P67779|PHB_RAT
GO:2001204	regulation of osteoclast development	1	sp|P12346|TRFE_RAT
GO:1902806	regulation of cell cycle G1/S phase transition	1	sp|P67779|PHB_RAT
GO:0030521	androgen receptor signaling pathway	1	sp|P67779|PHB_RAT
GO:1901992	positive regulation of mitotic cell cycle phase transition	1	sp|P67779|PHB_RAT
GO:0019731	antibacterial humoral response	1	sp|P12346|TRFE_RAT
GO:0043051	regulation of pharyngeal pumping	1	sp|P67779|PHB_RAT
GO:0046474	glycerophospholipid biosynthetic process	1	sp|P07483|FABPH_RAT
GO:0044788	modulation by host of viral process	1	sp|P12346|TRFE_RAT
GO:0031536	positive regulation of exit from mitosis	1	sp|P67779|PHB_RAT
GO:0001895	retina homeostasis	1	sp|P12346|TRFE_RAT
GO:0070447	positive regulation of oligodendrocyte progenitor proliferation	1	sp|P12346|TRFE_RAT
GO:0048259	regulation of receptor-mediated endocytosis	1	sp|P12346|TRFE_RAT
GO:0000060	protein import into nucleus, translocation	1	sp|P67779|PHB_RAT
GO:0019732	antifungal humoral response	1	sp|P12346|TRFE_RAT
GO:0006534	cysteine metabolic process	1	sp|P42123|LDHB_RAT
GO:0055088	lipid homeostasis	1	sp|P07483|FABPH_RAT
GO:0071363	cellular response to growth factor stimulus	1	sp|P06761|GRP78_RAT
GO:0061180	mammary gland epithelium development	1	sp|P67779|PHB_RAT
GO:0002119	nematode larval development	1	sp|P06761|GRP78_RAT
GO:0006606	protein import into nucleus	1	sp|P67779|PHB_RAT
GO:0060444	branching involved in mammary gland duct morphogenesis	1	sp|P67779|PHB_RAT
GO:0002521	leukocyte differentiation	1	sp|P12346|TRFE_RAT
GO:0046456	icosanoid biosynthetic process	1	sp|P47727|CBR1_RAT
GO:0043632	modification-dependent macromolecule catabolic process	1	sp|P06761|GRP78_RAT
GO:0051783	regulation of nuclear division	1	sp|P67779|PHB_RAT
GO:0002761	regulation of myeloid leukocyte differentiation	1	sp|P12346|TRFE_RAT
GO:0051297	centrosome organization	1	sp|P06761|GRP78_RAT
GO:0032091	negative regulation of protein binding	1	sp|P06761|GRP78_RAT
GO:0031958	corticosteroid receptor signaling pathway	1	sp|P67779|PHB_RAT
GO:0032354	response to follicle-stimulating hormone	1	sp|P12346|TRFE_RAT
GO:0015908	fatty acid transport	1	sp|P07483|FABPH_RAT
GO:0060443	mammary gland morphogenesis	1	sp|P67779|PHB_RAT
GO:0007179	transforming growth factor beta receptor signaling pathway	1	sp|P06761|GRP78_RAT
GO:1902593	single-organism nuclear import	1	sp|P67779|PHB_RAT
GO:0043123	positive regulation of I-kappaB kinase/NF-kappaB signaling	1	sp|P12346|TRFE_RAT
GO:0030520	intracellular estrogen receptor signaling pathway	1	sp|P67779|PHB_RAT
GO:0043122	regulation of I-kappaB kinase/NF-kappaB signaling	1	sp|P12346|TRFE_RAT
GO:0009118	regulation of nucleoside metabolic process	1	sp|P67779|PHB_RAT
GO:0046503	glycerolipid catabolic process	1	sp|P07483|FABPH_RAT
GO:0071897	DNA biosynthetic process	1	sp|P67779|PHB_RAT
GO:0043462	regulation of ATPase activity	1	sp|P12346|TRFE_RAT
GO:0045861	negative regulation of proteolysis	1	sp|P67779|PHB_RAT
GO:0044257	cellular protein catabolic process	1	sp|P06761|GRP78_RAT
GO:0010039	response to iron ion	1	sp|P12346|TRFE_RAT
GO:1903725	regulation of phospholipid metabolic process	1	sp|P07483|FABPH_RAT
GO:0055002	striated muscle cell development	1	sp|P02793|FRIL1_RAT
GO:0042552	myelination	1	sp|P12346|TRFE_RAT
GO Distribution by Level (7)
GO-id	GO-term	#Seqs	Seqs
GO:1903506	regulation of nucleic acid-templated transcription	4	sp|P67779|PHB_RAT, sp|P06761|GRP78_RAT, sp|P07483|FABPH_RAT, sp|P12346|TRFE_RAT
GO:0097659	nucleic acid-templated transcription	4	sp|P67779|PHB_RAT, sp|P06761|GRP78_RAT, sp|P07483|FABPH_RAT, sp|P12346|TRFE_RAT
GO:0042325	regulation of phosphorylation	4	sp|P67779|PHB_RAT, sp|P06761|GRP78_RAT, sp|P07483|FABPH_RAT, sp|P12346|TRFE_RAT
GO:0001932	regulation of protein phosphorylation	4	sp|P67779|PHB_RAT, sp|P06761|GRP78_RAT, sp|P07483|FABPH_RAT, sp|P12346|TRFE_RAT
GO:0006468	protein phosphorylation	4	sp|P67779|PHB_RAT, sp|P06761|GRP78_RAT, sp|P07483|FABPH_RAT, sp|P12346|TRFE_RAT
GO:0030001	metal ion transport	3	sp|P19132|FRIH_RAT, sp|P02793|FRIL1_RAT, sp|P12346|TRFE_RAT
GO:1903508	positive regulation of nucleic acid-templated transcription	3	sp|P67779|PHB_RAT, sp|P06761|GRP78_RAT, sp|P12346|TRFE_RAT
GO:0001934	positive regulation of protein phosphorylation	3	sp|P67779|PHB_RAT, sp|P06761|GRP78_RAT, sp|P12346|TRFE_RAT
GO:0032787	monocarboxylic acid metabolic process	3	sp|P42123|LDHB_RAT, sp|P07483|FABPH_RAT, sp|P47727|CBR1_RAT
GO:0045859	regulation of protein kinase activity	3	sp|P06761|GRP78_RAT, sp|P07483|FABPH_RAT, sp|P12346|TRFE_RAT
GO:0098771	inorganic ion homeostasis	3	sp|P19132|FRIH_RAT, sp|P02793|FRIL1_RAT, sp|P12346|TRFE_RAT
GO:0055080	cation homeostasis	3	sp|P19132|FRIH_RAT, sp|P02793|FRIL1_RAT, sp|P12346|TRFE_RAT
GO:0030003	cellular cation homeostasis	3	sp|P19132|FRIH_RAT, sp|P02793|FRIL1_RAT, sp|P12346|TRFE_RAT
GO:0042327	positive regulation of phosphorylation	3	sp|P67779|PHB_RAT, sp|P06761|GRP78_RAT, sp|P12346|TRFE_RAT
GO:0006357	regulation of transcription from RNA polymerase II promoter	2	sp|P67779|PHB_RAT, sp|P06761|GRP78_RAT
GO:0050873	brown fat cell differentiation	2	sp|P07483|FABPH_RAT, sp|Q8VIF7|SBP1_RAT
GO:0006366	transcription from RNA polymerase II promoter	2	sp|P67779|PHB_RAT, sp|P06761|GRP78_RAT
GO:0009161	ribonucleoside monophosphate metabolic process	2	sp|P67779|PHB_RAT, sp|P42123|LDHB_RAT
GO:0009150	purine ribonucleotide metabolic process	2	sp|P67779|PHB_RAT, sp|P42123|LDHB_RAT
GO:0009144	purine nucleoside triphosphate metabolic process	2	sp|P67779|PHB_RAT, sp|P42123|LDHB_RAT
GO:0009126	purine nucleoside monophosphate metabolic process	2	sp|P67779|PHB_RAT, sp|P42123|LDHB_RAT
GO:0009199	ribonucleoside triphosphate metabolic process	2	sp|P67779|PHB_RAT, sp|P42123|LDHB_RAT
GO:1903507	negative regulation of nucleic acid-templated transcription	2	sp|P67779|PHB_RAT, sp|P07483|FABPH_RAT
GO:0046128	purine ribonucleoside metabolic process	2	sp|P67779|PHB_RAT, sp|P42123|LDHB_RAT
GO:0048699	generation of neurons	2	sp|P06761|GRP78_RAT, sp|P12346|TRFE_RAT
GO:0001933	negative regulation of protein phosphorylation	2	sp|P67779|PHB_RAT, sp|P07483|FABPH_RAT
GO:0033674	positive regulation of kinase activity	2	sp|P06761|GRP78_RAT, sp|P12346|TRFE_RAT
GO:0042326	negative regulation of phosphorylation	2	sp|P67779|PHB_RAT, sp|P07483|FABPH_RAT
GO:0006006	glucose metabolic process	2	sp|P06761|GRP78_RAT, sp|P42123|LDHB_RAT
GO:0072330	monocarboxylic acid biosynthetic process	2	sp|P42123|LDHB_RAT, sp|P47727|CBR1_RAT
GO:0070613	regulation of protein processing	1	sp|P67779|PHB_RAT
GO:0045944	positive regulation of transcription from RNA polymerase II promoter	1	sp|P06761|GRP78_RAT
GO:0034504	protein localization to nucleus	1	sp|P67779|PHB_RAT
GO:0050872	white fat cell differentiation	1	sp|P07483|FABPH_RAT
GO:0070972	protein localization to endoplasmic reticulum	1	sp|P06761|GRP78_RAT
GO:0046464	acylglycerol catabolic process	1	sp|P07483|FABPH_RAT
GO:0036003	positive regulation of transcription from RNA polymerase II promoter in response to stress	1	sp|P06761|GRP78_RAT
GO:1903578	regulation of ATP metabolic process	1	sp|P67779|PHB_RAT
GO:0071287	cellular response to manganese ion	1	sp|P06761|GRP78_RAT
GO:0019371	cyclooxygenase pathway	1	sp|P47727|CBR1_RAT
GO:0014904	myotube cell development	1	sp|P02793|FRIL1_RAT
GO:0015909	long-chain fatty acid transport	1	sp|P07483|FABPH_RAT
GO:0055091	phospholipid homeostasis	1	sp|P07483|FABPH_RAT
GO:1903320	regulation of protein modification by small protein conjugation or removal	1	sp|P06761|GRP78_RAT
GO:0071372	cellular response to follicle-stimulating hormone stimulus	1	sp|P12346|TRFE_RAT
GO:0016246	RNA interference	1	sp|P06761|GRP78_RAT
GO:0071356	cellular response to tumor necrosis factor	1	sp|P07483|FABPH_RAT
GO:0046457	prostanoid biosynthetic process	1	sp|P47727|CBR1_RAT
GO:0071353	cellular response to interleukin-4	1	sp|P06761|GRP78_RAT
GO:0071354	cellular response to interleukin-6	1	sp|P67779|PHB_RAT
GO:0045670	regulation of osteoclast differentiation	1	sp|P12346|TRFE_RAT
GO:1900542	regulation of purine nucleotide metabolic process	1	sp|P67779|PHB_RAT
GO:0098659	inorganic cation import into cell	1	sp|P12346|TRFE_RAT
GO:0043406	positive regulation of MAP kinase activity	1	sp|P12346|TRFE_RAT
GO:0071281	cellular response to iron ion	1	sp|P12346|TRFE_RAT
GO:0055081	anion homeostasis	1	sp|P07483|FABPH_RAT
GO:0000122	negative regulation of transcription from RNA polymerase II promoter	1	sp|P67779|PHB_RAT
GO:0046939	nucleotide phosphorylation	1	sp|P42123|LDHB_RAT
GO:0019244	lactate biosynthetic process from pyruvate	1	sp|P42123|LDHB_RAT
GO:0009185	ribonucleoside diphosphate metabolic process	1	sp|P42123|LDHB_RAT
GO:0006953	acute-phase response	1	sp|P12346|TRFE_RAT
GO:0048747	muscle fiber development	1	sp|P02793|FRIL1_RAT
GO:0033673	negative regulation of kinase activity	1	sp|P07483|FABPH_RAT
GO:0006165	nucleoside diphosphate phosphorylation	1	sp|P42123|LDHB_RAT
GO:0002573	myeloid leukocyte differentiation	1	sp|P12346|TRFE_RAT
GO:0070374	positive regulation of ERK1 and ERK2 cascade	1	sp|P67779|PHB_RAT
GO:0055092	sterol homeostasis	1	sp|P07483|FABPH_RAT
GO:0019941	modification-dependent protein catabolic process	1	sp|P06761|GRP78_RAT
GO:0007519	skeletal muscle tissue development	1	sp|P02793|FRIL1_RAT
GO:0010954	positive regulation of protein processing	1	sp|P67779|PHB_RAT
GO:0042063	gliogenesis	1	sp|P12346|TRFE_RAT
GO:0043405	regulation of MAP kinase activity	1	sp|P12346|TRFE_RAT
GO:0014902	myotube differentiation	1	sp|P02793|FRIL1_RAT
GO:0070373	negative regulation of ERK1 and ERK2 cascade	1	sp|P67779|PHB_RAT
GO:0002576	platelet degranulation	1	sp|P12346|TRFE_RAT
GO:0010944	negative regulation of transcription by competitive promoter binding	1	sp|P67779|PHB_RAT
GO:0046328	regulation of JNK cascade	1	sp|P12346|TRFE_RAT
GO:0035601	protein deacylation	1	sp|P67779|PHB_RAT
GO:0002224	toll-like receptor signaling pathway	1	sp|P12346|TRFE_RAT
GO:0045671	negative regulation of osteoclast differentiation	1	sp|P12346|TRFE_RAT
GO:0006693	prostaglandin metabolic process	1	sp|P47727|CBR1_RAT
GO:0051170	nuclear import	1	sp|P67779|PHB_RAT
GO:0035437	maintenance of protein localization in endoplasmic reticulum	1	sp|P06761|GRP78_RAT
GO:0043009	chordate embryonic development	1	sp|P01946|HBA_RAT
GO:0014013	regulation of gliogenesis	1	sp|P12346|TRFE_RAT
GO:0046496	nicotinamide nucleotide metabolic process	1	sp|P42123|LDHB_RAT
GO:0009135	purine nucleoside diphosphate metabolic process	1	sp|P42123|LDHB_RAT
GO:0032874	positive regulation of stress-activated MAPK cascade	1	sp|P12346|TRFE_RAT
GO:0070372	regulation of ERK1 and ERK2 cascade	1	sp|P67779|PHB_RAT
GO:0042921	glucocorticoid receptor signaling pathway	1	sp|P67779|PHB_RAT
GO:0072512	trivalent inorganic cation transport	1	sp|P12346|TRFE_RAT
GO:0006898	receptor-mediated endocytosis	1	sp|P12346|TRFE_RAT
GO:0016575	histone deacetylation	1	sp|P67779|PHB_RAT
GO:0007254	JNK cascade	1	sp|P12346|TRFE_RAT
GO:1903322	positive regulation of protein modification by small protein conjugation or removal	1	sp|P06761|GRP78_RAT
GO:0015718	monocarboxylic acid transport	1	sp|P07483|FABPH_RAT
GO:0032780	negative regulation of ATPase activity	1	sp|P12346|TRFE_RAT
GO:0045664	regulation of neuron differentiation	1	sp|P06761|GRP78_RAT
GO:0046320	regulation of fatty acid oxidation	1	sp|P07483|FABPH_RAT
GO:0019319	hexose biosynthetic process	1	sp|P42123|LDHB_RAT
GO:0090074	negative regulation of protein homodimerization activity	1	sp|P06761|GRP78_RAT
GO:0042376	phylloquinone catabolic process	1	sp|P47727|CBR1_RAT
GO:1904234	positive regulation of aconitate hydratase activity	1	sp|P19132|FRIH_RAT
GO:0072511	divalent inorganic cation transport	1	sp|P12346|TRFE_RAT
GO:0043161	proteasome-mediated ubiquitin-dependent protein catabolic process	1	sp|P06761|GRP78_RAT
GO:0070647	protein modification by small protein conjugation or removal	1	sp|P06761|GRP78_RAT
GO:0006636	unsaturated fatty acid biosynthetic process	1	sp|P47727|CBR1_RAT
GO:0007605	sensory perception of sound	1	sp|P02793|FRIL1_RAT
GO:0071285	cellular response to lithium ion	1	sp|P07483|FABPH_RAT
GO:0006641	triglyceride metabolic process	1	sp|P07483|FABPH_RAT
GO Distribution by Level (8)
GO-id	GO-term	#Seqs	Seqs
GO:0000041	transition metal ion transport	3	sp|P19132|FRIH_RAT, sp|P02793|FRIL1_RAT, sp|P12346|TRFE_RAT
GO:0055065	metal ion homeostasis	3	sp|P19132|FRIH_RAT, sp|P02793|FRIL1_RAT, sp|P12346|TRFE_RAT
GO:0006875	cellular metal ion homeostasis	3	sp|P19132|FRIH_RAT, sp|P02793|FRIL1_RAT, sp|P12346|TRFE_RAT
GO:0046034	ATP metabolic process	2	sp|P67779|PHB_RAT, sp|P42123|LDHB_RAT
GO:0009205	purine ribonucleoside triphosphate metabolic process	2	sp|P67779|PHB_RAT, sp|P42123|LDHB_RAT
GO:0009167	purine ribonucleoside monophosphate metabolic process	2	sp|P67779|PHB_RAT, sp|P42123|LDHB_RAT
GO:0045860	positive regulation of protein kinase activity	2	sp|P06761|GRP78_RAT, sp|P12346|TRFE_RAT
GO:0044539	long-chain fatty acid import	1	sp|P07483|FABPH_RAT
GO:0006469	negative regulation of protein kinase activity	1	sp|P07483|FABPH_RAT
GO:0042632	cholesterol homeostasis	1	sp|P07483|FABPH_RAT
GO:0006476	protein deacetylation	1	sp|P67779|PHB_RAT
GO:0015682	ferric iron transport	1	sp|P12346|TRFE_RAT
GO:0000187	activation of MAPK activity	1	sp|P12346|TRFE_RAT
GO:0030316	osteoclast differentiation	1	sp|P12346|TRFE_RAT
GO:0034142	toll-like receptor 4 signaling pathway	1	sp|P12346|TRFE_RAT
GO:0019433	triglyceride catabolic process	1	sp|P07483|FABPH_RAT
GO:0097459	iron ion import into cell	1	sp|P12346|TRFE_RAT
GO:0071900	regulation of protein serine/threonine kinase activity	1	sp|P12346|TRFE_RAT
GO:0031398	positive regulation of protein ubiquitination	1	sp|P06761|GRP78_RAT
GO:0048741	skeletal muscle fiber development	1	sp|P02793|FRIL1_RAT
GO:0043507	positive regulation of JUN kinase activity	1	sp|P12346|TRFE_RAT
GO:0009179	purine ribonucleoside diphosphate metabolic process	1	sp|P42123|LDHB_RAT
GO:0046330	positive regulation of JNK cascade	1	sp|P12346|TRFE_RAT
GO:0001701	in utero embryonic development	1	sp|P01946|HBA_RAT
GO:0046031	ADP metabolic process	1	sp|P42123|LDHB_RAT
GO:0043506	regulation of JUN kinase activity	1	sp|P12346|TRFE_RAT
GO:0007257	activation of JUN kinase activity	1	sp|P12346|TRFE_RAT
GO:0001516	prostaglandin biosynthetic process	1	sp|P47727|CBR1_RAT
GO:0006094	gluconeogenesis	1	sp|P42123|LDHB_RAT
GO:0019674	NAD metabolic process	1	sp|P42123|LDHB_RAT
GO:0032446	protein modification by small protein conjugation	1	sp|P06761|GRP78_RAT
GO:0070838	divalent metal ion transport	1	sp|P12346|TRFE_RAT
GO:0006511	ubiquitin-dependent protein catabolic process	1	sp|P06761|GRP78_RAT
GO:0031396	regulation of protein ubiquitination	1	sp|P06761|GRP78_RAT
GO:0006090	pyruvate metabolic process	1	sp|P42123|LDHB_RAT

## Sheet: Molecular function
GO Distribution by Level (2)
GO-id	GO-term	#Seqs	Seqs
GO:0005488	binding	10	sp|P19132|FRIH_RAT, sp|P67779|PHB_RAT, sp|P06761|GRP78_RAT, sp|P42123|LDHB_RAT, sp|P07483|FABPH_RAT, sp|P47727|CBR1_RAT, sp|P02793|FRIL1_RAT, sp|P01946|HBA_RAT, sp|P12346|TRFE_RAT, sp|Q8VIF7|SBP1_RAT
GO:0003824	catalytic activity	8	sp|P19132|FRIH_RAT, sp|P06761|GRP78_RAT, sp|P42123|LDHB_RAT, tr|D3Z8I7|D3Z8I7_RAT, sp|P47727|CBR1_RAT, sp|P02793|FRIL1_RAT, sp|P12346|TRFE_RAT, sp|P01946|HBA_RAT
GO:0005215	transporter activity	3	sp|P07483|FABPH_RAT, sp|P01946|HBA_RAT, sp|P12346|TRFE_RAT
GO:0016209	antioxidant activity	2	tr|D3Z8I7|D3Z8I7_RAT, sp|P01946|HBA_RAT
GO:0098772	molecular function regulator	1	sp|P12346|TRFE_RAT
GO:0001071	nucleic acid binding transcription factor activity	1	sp|P67779|PHB_RAT
GO:0005198	structural molecule activity	1	sp|P42123|LDHB_RAT
GO Distribution by Level (3)
GO-id	GO-term	#Seqs	Seqs
GO:0005515	protein binding	10	sp|P19132|FRIH_RAT, sp|P67779|PHB_RAT, sp|P06761|GRP78_RAT, sp|P42123|LDHB_RAT, sp|P07483|FABPH_RAT, sp|P47727|CBR1_RAT, sp|P02793|FRIL1_RAT, sp|P01946|HBA_RAT, sp|P12346|TRFE_RAT, sp|Q8VIF7|SBP1_RAT
GO:0043167	ion binding	7	sp|P19132|FRIH_RAT, sp|P06761|GRP78_RAT, sp|P07483|FABPH_RAT, sp|P47727|CBR1_RAT, sp|P02793|FRIL1_RAT, sp|P12346|TRFE_RAT, sp|P01946|HBA_RAT
GO:1901363	heterocyclic compound binding	6	sp|P67779|PHB_RAT, sp|P06761|GRP78_RAT, sp|P42123|LDHB_RAT, sp|P47727|CBR1_RAT, sp|P12346|TRFE_RAT, sp|P01946|HBA_RAT
GO:0097159	organic cyclic compound binding	6	sp|P67779|PHB_RAT, sp|P06761|GRP78_RAT, sp|P42123|LDHB_RAT, sp|P47727|CBR1_RAT, sp|P12346|TRFE_RAT, sp|P01946|HBA_RAT
GO:0036094	small molecule binding	6	sp|P06761|GRP78_RAT, sp|P07483|FABPH_RAT, sp|P42123|LDHB_RAT, sp|P47727|CBR1_RAT, sp|P01946|HBA_RAT, sp|P12346|TRFE_RAT
GO:0016491	oxidoreductase activity	6	sp|P19132|FRIH_RAT, sp|P42123|LDHB_RAT, tr|D3Z8I7|D3Z8I7_RAT, sp|P47727|CBR1_RAT, sp|P02793|FRIL1_RAT, sp|P01946|HBA_RAT
GO:0016787	hydrolase activity	3	sp|P06761|GRP78_RAT, tr|D3Z8I7|D3Z8I7_RAT, sp|P12346|TRFE_RAT
GO:0022892	substrate-specific transporter activity	3	sp|P07483|FABPH_RAT, sp|P12346|TRFE_RAT, sp|P01946|HBA_RAT
GO:0004601	peroxidase activity	2	tr|D3Z8I7|D3Z8I7_RAT, sp|P01946|HBA_RAT
GO:0048037	cofactor binding	2	sp|P42123|LDHB_RAT, sp|P47727|CBR1_RAT
GO:0097367	carbohydrate derivative binding	2	sp|P06761|GRP78_RAT, sp|P12346|TRFE_RAT
GO:0019825	oxygen binding	1	sp|P01946|HBA_RAT
GO:0008430	selenium binding	1	sp|Q8VIF7|SBP1_RAT
GO:0003700	transcription factor activity, sequence-specific DNA binding	1	sp|P67779|PHB_RAT
GO:0016740	transferase activity	1	tr|D3Z8I7|D3Z8I7_RAT
GO:0005212	structural constituent of eye lens	1	sp|P42123|LDHB_RAT
GO:0022857	transmembrane transporter activity	1	sp|P12346|TRFE_RAT
GO:1901681	sulfur compound binding	1	sp|P12346|TRFE_RAT
GO:0008289	lipid binding	1	sp|P07483|FABPH_RAT
GO:0044877	macromolecular complex binding	1	sp|P06761|GRP78_RAT
GO:0030234	enzyme regulator activity	1	sp|P12346|TRFE_RAT
GO:0033218	amide binding	1	sp|P67779|PHB_RAT
GO Distribution by Level (4)
GO-id	GO-term	#Seqs	Seqs
GO:0043169	cation binding	5	sp|P19132|FRIH_RAT, sp|P06761|GRP78_RAT, sp|P02793|FRIL1_RAT, sp|P12346|TRFE_RAT, sp|P01946|HBA_RAT
GO:0043168	anion binding	4	sp|P06761|GRP78_RAT, sp|P07483|FABPH_RAT, sp|P47727|CBR1_RAT, sp|P12346|TRFE_RAT
GO:1901265	nucleoside phosphate binding	4	sp|P06761|GRP78_RAT, sp|P42123|LDHB_RAT, sp|P47727|CBR1_RAT, sp|P12346|TRFE_RAT
GO:0000166	nucleotide binding	4	sp|P06761|GRP78_RAT, sp|P42123|LDHB_RAT, sp|P47727|CBR1_RAT, sp|P12346|TRFE_RAT
GO:0019899	enzyme binding	3	sp|P67779|PHB_RAT, sp|P06761|GRP78_RAT, sp|P42123|LDHB_RAT
GO:0050662	coenzyme binding	2	sp|P42123|LDHB_RAT, sp|P47727|CBR1_RAT
GO:0042802	identical protein binding	2	sp|P42123|LDHB_RAT, sp|P02793|FRIL1_RAT
GO:0043177	organic acid binding	2	sp|P07483|FABPH_RAT, sp|P01946|HBA_RAT
GO:0016722	oxidoreductase activity, oxidizing metal ions	2	sp|P19132|FRIH_RAT, sp|P02793|FRIL1_RAT
GO:0001882	nucleoside binding	2	sp|P06761|GRP78_RAT, sp|P12346|TRFE_RAT
GO:0032553	ribonucleotide binding	2	sp|P06761|GRP78_RAT, sp|P12346|TRFE_RAT
GO:0016614	oxidoreductase activity, acting on CH-OH group of donors	2	sp|P42123|LDHB_RAT, sp|P47727|CBR1_RAT
GO:0016684	oxidoreductase activity, acting on peroxide as acceptor	2	tr|D3Z8I7|D3Z8I7_RAT, sp|P01946|HBA_RAT
GO:0005102	receptor binding	2	sp|P67779|PHB_RAT, sp|P12346|TRFE_RAT
GO:0004857	enzyme inhibitor activity	1	sp|P12346|TRFE_RAT
GO:0001848	complement binding	1	sp|P67779|PHB_RAT
GO:0008134	transcription factor binding	1	sp|P06761|GRP78_RAT
GO:0016765	transferase activity, transferring alkyl or aryl (other than methyl) groups	1	tr|D3Z8I7|D3Z8I7_RAT
GO:0005539	glycosaminoglycan binding	1	sp|P12346|TRFE_RAT
GO:0047485	protein N-terminus binding	1	sp|P67779|PHB_RAT
GO:0016824	hydrolase activity, acting on acid halide bonds	1	tr|D3Z8I7|D3Z8I7_RAT
GO:0031720	haptoglobin binding	1	sp|P01946|HBA_RAT
GO:0016651	oxidoreductase activity, acting on NAD(P)H	1	sp|P47727|CBR1_RAT
GO:0017171	serine hydrolase activity	1	sp|P12346|TRFE_RAT
GO:0022891	substrate-specific transmembrane transporter activity	1	sp|P12346|TRFE_RAT
GO:0001846	opsonin binding	1	sp|P67779|PHB_RAT
GO:0000981	RNA polymerase II transcription factor activity, sequence-specific DNA binding	1	sp|P67779|PHB_RAT
GO:0008201	heparin binding	1	sp|P12346|TRFE_RAT
GO:0008092	cytoskeletal protein binding	1	sp|P07483|FABPH_RAT
GO:0004602	glutathione peroxidase activity	1	tr|D3Z8I7|D3Z8I7_RAT
GO:0051082	unfolded protein binding	1	sp|P06761|GRP78_RAT
GO:0005504	fatty acid binding	1	sp|P07483|FABPH_RAT
GO:0019207	kinase regulator activity	1	sp|P12346|TRFE_RAT
GO:0005319	lipid transporter activity	1	sp|P07483|FABPH_RAT
GO:0046906	tetrapyrrole binding	1	sp|P01946|HBA_RAT
GO:0008047	enzyme activator activity	1	sp|P12346|TRFE_RAT
GO:0003676	nucleic acid binding	1	sp|P67779|PHB_RAT
GO:0051787	misfolded protein binding	1	sp|P06761|GRP78_RAT
GO:0008233	peptidase activity	1	sp|P12346|TRFE_RAT
GO:0019904	protein domain specific binding	1	sp|P06761|GRP78_RAT
GO:0050839	cell adhesion molecule binding	1	sp|P06761|GRP78_RAT
GO:0008022	protein C-terminus binding	1	sp|P67779|PHB_RAT
GO:0098631	protein binding involved in cell adhesion	1	sp|P06761|GRP78_RAT
GO:0001948	glycoprotein binding	1	sp|P06761|GRP78_RAT
GO:0005344	oxygen transporter activity	1	sp|P01946|HBA_RAT
GO:0043021	ribonucleoprotein complex binding	1	sp|P06761|GRP78_RAT
GO:0016817	hydrolase activity, acting on acid anhydrides	1	sp|P06761|GRP78_RAT
GO:0051087	chaperone binding	1	sp|P06761|GRP78_RAT
GO Distribution by Level (5)
GO-id	GO-term	#Seqs	Seqs
GO:0046872	metal ion binding	5	sp|P19132|FRIH_RAT, sp|P06761|GRP78_RAT, sp|P02793|FRIL1_RAT, sp|P01946|HBA_RAT, sp|P12346|TRFE_RAT
GO:0035639	purine ribonucleoside triphosphate binding	2	sp|P06761|GRP78_RAT, sp|P12346|TRFE_RAT
GO:0001883	purine nucleoside binding	2	sp|P06761|GRP78_RAT, sp|P12346|TRFE_RAT
GO:0016724	oxidoreductase activity, oxidizing metal ions, oxygen as acceptor	2	sp|P19132|FRIH_RAT, sp|P02793|FRIL1_RAT
GO:0032549	ribonucleoside binding	2	sp|P06761|GRP78_RAT, sp|P12346|TRFE_RAT
GO:0017076	purine nucleotide binding	2	sp|P06761|GRP78_RAT, sp|P12346|TRFE_RAT
GO:0032555	purine ribonucleotide binding	2	sp|P06761|GRP78_RAT, sp|P12346|TRFE_RAT
GO:0016616	oxidoreductase activity, acting on the CH-OH group of donors, NAD or NADP as acceptor	2	sp|P42123|LDHB_RAT, sp|P47727|CBR1_RAT
GO:0001067	regulatory region nucleic acid binding	1	sp|P67779|PHB_RAT
GO:0001085	RNA polymerase II transcription factor binding	1	sp|P06761|GRP78_RAT
GO:0043022	ribosome binding	1	sp|P06761|GRP78_RAT
GO:0019209	kinase activator activity	1	sp|P12346|TRFE_RAT
GO:0036041	long-chain fatty acid binding	1	sp|P07483|FABPH_RAT
GO:0045296	cadherin binding	1	sp|P06761|GRP78_RAT
GO:0001664	G-protein coupled receptor binding	1	sp|P67779|PHB_RAT
GO:0051427	hormone receptor binding	1	sp|P67779|PHB_RAT
GO:1990459	transferrin receptor binding	1	sp|P12346|TRFE_RAT
GO:0070011	peptidase activity, acting on L-amino acid peptides	1	sp|P12346|TRFE_RAT
GO:0016818	hydrolase activity, acting on acid anhydrides, in phosphorus-containing anhydrides	1	sp|P06761|GRP78_RAT
GO:0016655	oxidoreductase activity, acting on NAD(P)H, quinone or similar compound as acceptor	1	sp|P47727|CBR1_RAT
GO:0019900	kinase binding	1	sp|P42123|LDHB_RAT
GO:0042826	histone deacetylase binding	1	sp|P67779|PHB_RAT
GO:0019887	protein kinase regulator activity	1	sp|P12346|TRFE_RAT
GO:0001850	complement component C3a binding	1	sp|P67779|PHB_RAT
GO:0004457	lactate dehydrogenase activity	1	sp|P42123|LDHB_RAT
GO:0001851	complement component C3b binding	1	sp|P67779|PHB_RAT
GO:0051287	NAD binding	1	sp|P42123|LDHB_RAT
GO:0070402	NADPH binding	1	sp|P47727|CBR1_RAT
GO:0020037	heme binding	1	sp|P01946|HBA_RAT
GO:0015245	fatty acid transporter activity	1	sp|P07483|FABPH_RAT
GO:0050661	NADP binding	1	sp|P47727|CBR1_RAT
GO:0019120	hydrolase activity, acting on acid halide bonds, in C-halide compounds	1	tr|D3Z8I7|D3Z8I7_RAT
GO:0031406	carboxylic acid binding	1	sp|P07483|FABPH_RAT
GO:0003677	DNA binding	1	sp|P67779|PHB_RAT
GO:0015075	ion transmembrane transporter activity	1	sp|P12346|TRFE_RAT
GO:0008236	serine-type peptidase activity	1	sp|P12346|TRFE_RAT
GO:0044389	ubiquitin-like protein ligase binding	1	sp|P06761|GRP78_RAT
GO:0098632	protein binding involved in cell-cell adhesion	1	sp|P06761|GRP78_RAT
GO:0004364	glutathione transferase activity	1	tr|D3Z8I7|D3Z8I7_RAT
GO Distribution by Level (6)
GO-id	GO-term	#Seqs	Seqs
GO:0046914	transition metal ion binding	4	sp|P19132|FRIH_RAT, sp|P02793|FRIL1_RAT, sp|P12346|TRFE_RAT, sp|P01946|HBA_RAT
GO:0032550	purine ribonucleoside binding	2	sp|P06761|GRP78_RAT, sp|P12346|TRFE_RAT
GO:0004322	ferroxidase activity	2	sp|P19132|FRIH_RAT, sp|P02793|FRIL1_RAT
GO:0004175	endopeptidase activity	1	sp|P12346|TRFE_RAT
GO:0005509	calcium ion binding	1	sp|P06761|GRP78_RAT
GO:0030554	adenyl nucleotide binding	1	sp|P06761|GRP78_RAT
GO:0004090	carbonyl reductase (NADPH) activity	1	sp|P47727|CBR1_RAT
GO:0050543	icosatetraenoic acid binding	1	sp|P07483|FABPH_RAT
GO:0004022	alcohol dehydrogenase (NAD) activity	1	sp|P47727|CBR1_RAT
GO:0047021	15-hydroxyprostaglandin dehydrogenase (NADP+) activity	1	sp|P47727|CBR1_RAT
GO:0000253	3-keto sterol reductase activity	1	sp|P47727|CBR1_RAT
GO:0005524	ATP binding	1	sp|P06761|GRP78_RAT
GO:0031625	ubiquitin protein ligase binding	1	sp|P06761|GRP78_RAT
GO:0004252	serine-type endopeptidase activity	1	sp|P12346|TRFE_RAT
GO:0000975	regulatory region DNA binding	1	sp|P67779|PHB_RAT
GO:0030295	protein kinase activator activity	1	sp|P12346|TRFE_RAT
GO:0035257	nuclear hormone receptor binding	1	sp|P67779|PHB_RAT
GO:0019001	guanyl nucleotide binding	1	sp|P12346|TRFE_RAT
GO:0070538	oleic acid binding	1	sp|P07483|FABPH_RAT
GO:0050221	prostaglandin-E2 9-reductase activity	1	sp|P47727|CBR1_RAT
GO:0005324	long-chain fatty acid transporter activity	1	sp|P07483|FABPH_RAT
GO:0008324	cation transmembrane transporter activity	1	sp|P12346|TRFE_RAT
GO:0098641	cadherin binding involved in cell-cell adhesion	1	sp|P06761|GRP78_RAT
GO:0005525	GTP binding	1	sp|P12346|TRFE_RAT
GO:0032561	guanyl ribonucleotide binding	1	sp|P12346|TRFE_RAT
GO:0031871	proteinase activated receptor binding	1	sp|P67779|PHB_RAT
GO:0032559	adenyl ribonucleotide binding	1	sp|P06761|GRP78_RAT
GO:0016462	pyrophosphatase activity	1	sp|P06761|GRP78_RAT
GO:0004459	L-lactate dehydrogenase activity	1	sp|P42123|LDHB_RAT
GO:0033293	monocarboxylic acid binding	1	sp|P07483|FABPH_RAT
GO:0047651	alkylhalidase activity	1	tr|D3Z8I7|D3Z8I7_RAT
GO Distribution by Level (7)
GO-id	GO-term	#Seqs	Seqs
GO:0005506	iron ion binding	4	sp|P19132|FRIH_RAT, sp|P02793|FRIL1_RAT, sp|P01946|HBA_RAT, sp|P12346|TRFE_RAT
GO:0035258	steroid hormone receptor binding	1	sp|P67779|PHB_RAT
GO:0017111	nucleoside-triphosphatase activity	1	sp|P06761|GRP78_RAT
GO:0043539	protein serine/threonine kinase activator activity	1	sp|P12346|TRFE_RAT
GO:0022890	inorganic cation transmembrane transporter activity	1	sp|P12346|TRFE_RAT
GO:0044212	transcription regulatory region DNA binding	1	sp|P67779|PHB_RAT
GO Distribution by Level (8)
GO-id	GO-term	#Seqs	Seqs
GO:0008199	ferric iron binding	3	sp|P19132|FRIH_RAT, sp|P02793|FRIL1_RAT, sp|P12346|TRFE_RAT
GO:0008198	ferrous iron binding	1	sp|P12346|TRFE_RAT
GO:0030331	estrogen receptor binding	1	sp|P67779|PHB_RAT
GO:0072510	trivalent inorganic cation transmembrane transporter activity	1	sp|P12346|TRFE_RAT
GO:0016887	ATPase activity	1	sp|P06761|GRP78_RAT
GO:0046873	metal ion transmembrane transporter activity	1	sp|P12346|TRFE_RAT

## Sheet: Cellular component
GO Distribution by Level (2)
GO-id	GO-term	#Seqs	Seqs
GO:0044464	cell part	11	sp|P19132|FRIH_RAT, sp|P67779|PHB_RAT, sp|P06761|GRP78_RAT, sp|P07483|FABPH_RAT, sp|P42123|LDHB_RAT, tr|D3Z8I7|D3Z8I7_RAT, sp|P47727|CBR1_RAT, sp|P02793|FRIL1_RAT, sp|P12346|TRFE_RAT, sp|P01946|HBA_RAT, sp|Q8VIF7|SBP1_RAT
GO:0043226	organelle	11	sp|P19132|FRIH_RAT, sp|P67779|PHB_RAT, sp|P06761|GRP78_RAT, sp|P07483|FABPH_RAT, sp|P42123|LDHB_RAT, tr|D3Z8I7|D3Z8I7_RAT, sp|P47727|CBR1_RAT, sp|P02793|FRIL1_RAT, sp|P12346|TRFE_RAT, sp|P01946|HBA_RAT, sp|Q8VIF7|SBP1_RAT
GO:0044421	extracellular region part	11	sp|P19132|FRIH_RAT, sp|P67779|PHB_RAT, sp|P06761|GRP78_RAT, sp|P07483|FABPH_RAT, sp|P42123|LDHB_RAT, tr|D3Z8I7|D3Z8I7_RAT, sp|P47727|CBR1_RAT, sp|P02793|FRIL1_RAT, sp|P12346|TRFE_RAT, sp|P01946|HBA_RAT, sp|Q8VIF7|SBP1_RAT
GO:0005576	extracellular region	11	sp|P19132|FRIH_RAT, sp|P67779|PHB_RAT, sp|P06761|GRP78_RAT, sp|P07483|FABPH_RAT, sp|P42123|LDHB_RAT, tr|D3Z8I7|D3Z8I7_RAT, sp|P47727|CBR1_RAT, sp|P02793|FRIL1_RAT, sp|P12346|TRFE_RAT, sp|P01946|HBA_RAT, sp|Q8VIF7|SBP1_RAT
GO:0005623	cell	11	sp|P19132|FRIH_RAT, sp|P67779|PHB_RAT, sp|P06761|GRP78_RAT, sp|P07483|FABPH_RAT, sp|P42123|LDHB_RAT, tr|D3Z8I7|D3Z8I7_RAT, sp|P47727|CBR1_RAT, sp|P02793|FRIL1_RAT, sp|P12346|TRFE_RAT, sp|P01946|HBA_RAT, sp|Q8VIF7|SBP1_RAT
GO:0044422	organelle part	8	sp|P67779|PHB_RAT, sp|P06761|GRP78_RAT, sp|P07483|FABPH_RAT, sp|P47727|CBR1_RAT, sp|P02793|FRIL1_RAT, sp|P12346|TRFE_RAT, sp|P01946|HBA_RAT, sp|Q8VIF7|SBP1_RAT
GO:0016020	membrane	8	sp|P67779|PHB_RAT, sp|P06761|GRP78_RAT, sp|P42123|LDHB_RAT, sp|P47727|CBR1_RAT, sp|P02793|FRIL1_RAT, sp|P01946|HBA_RAT, sp|P12346|TRFE_RAT, sp|Q8VIF7|SBP1_RAT
GO:0032991	macromolecular complex	6	sp|P19132|FRIH_RAT, sp|P67779|PHB_RAT, sp|P06761|GRP78_RAT, sp|P02793|FRIL1_RAT, sp|P01946|HBA_RAT, sp|P12346|TRFE_RAT
GO:0031974	membrane-enclosed lumen	6	sp|P67779|PHB_RAT, sp|P06761|GRP78_RAT, sp|P07483|FABPH_RAT, sp|P47727|CBR1_RAT, sp|P12346|TRFE_RAT, sp|Q8VIF7|SBP1_RAT
GO:0044425	membrane part	5	sp|P67779|PHB_RAT, sp|P06761|GRP78_RAT, sp|P42123|LDHB_RAT, sp|P02793|FRIL1_RAT, sp|P12346|TRFE_RAT
GO:0030054	cell junction	3	sp|P67779|PHB_RAT, sp|P06761|GRP78_RAT, sp|P07483|FABPH_RAT
GO:0055044	symplast	1	sp|P67779|PHB_RAT
GO Distribution by Level (3)
GO-id	GO-term	#Seqs	Seqs
GO:0043229	intracellular organelle	11	sp|P19132|FRIH_RAT, sp|P67779|PHB_RAT, sp|P06761|GRP78_RAT, sp|P07483|FABPH_RAT, sp|P42123|LDHB_RAT, tr|D3Z8I7|D3Z8I7_RAT, sp|P47727|CBR1_RAT, sp|P02793|FRIL1_RAT, sp|P12346|TRFE_RAT, sp|P01946|HBA_RAT, sp|Q8VIF7|SBP1_RAT
GO:0043227	membrane-bounded organelle	11	sp|P19132|FRIH_RAT, sp|P67779|PHB_RAT, sp|P06761|GRP78_RAT, sp|P07483|FABPH_RAT, sp|P42123|LDHB_RAT, tr|D3Z8I7|D3Z8I7_RAT, sp|P47727|CBR1_RAT, sp|P02793|FRIL1_RAT, sp|P12346|TRFE_RAT, sp|P01946|HBA_RAT, sp|Q8VIF7|SBP1_RAT
GO:0044424	intracellular part	11	sp|P19132|FRIH_RAT, sp|P67779|PHB_RAT, sp|P06761|GRP78_RAT, sp|P07483|FABPH_RAT, sp|P42123|LDHB_RAT, tr|D3Z8I7|D3Z8I7_RAT, sp|P47727|CBR1_RAT, sp|P02793|FRIL1_RAT, sp|P01946|HBA_RAT, sp|P12346|TRFE_RAT, sp|Q8VIF7|SBP1_RAT
GO:1903561	extracellular vesicle	11	sp|P19132|FRIH_RAT, sp|P67779|PHB_RAT, sp|P06761|GRP78_RAT, sp|P07483|FABPH_RAT, sp|P42123|LDHB_RAT, tr|D3Z8I7|D3Z8I7_RAT, sp|P47727|CBR1_RAT, sp|P02793|FRIL1_RAT, sp|P12346|TRFE_RAT, sp|P01946|HBA_RAT, sp|Q8VIF7|SBP1_RAT
GO:0043230	extracellular organelle	11	sp|P19132|FRIH_RAT, sp|P67779|PHB_RAT, sp|P06761|GRP78_RAT, sp|P07483|FABPH_RAT, sp|P42123|LDHB_RAT, tr|D3Z8I7|D3Z8I7_RAT, sp|P47727|CBR1_RAT, sp|P02793|FRIL1_RAT, sp|P12346|TRFE_RAT, sp|P01946|HBA_RAT, sp|Q8VIF7|SBP1_RAT
GO:0070062	extracellular exosome	11	sp|P19132|FRIH_RAT, sp|P67779|PHB_RAT, sp|P06761|GRP78_RAT, sp|P07483|FABPH_RAT, sp|P42123|LDHB_RAT, tr|D3Z8I7|D3Z8I7_RAT, sp|P47727|CBR1_RAT, sp|P02793|FRIL1_RAT, sp|P12346|TRFE_RAT, sp|P01946|HBA_RAT, sp|Q8VIF7|SBP1_RAT
GO:0005622	intracellular	11	sp|P19132|FRIH_RAT, sp|P67779|PHB_RAT, sp|P06761|GRP78_RAT, sp|P07483|FABPH_RAT, sp|P42123|LDHB_RAT, tr|D3Z8I7|D3Z8I7_RAT, sp|P47727|CBR1_RAT, sp|P02793|FRIL1_RAT, sp|P01946|HBA_RAT, sp|P12346|TRFE_RAT, sp|Q8VIF7|SBP1_RAT
GO:0044446	intracellular organelle part	7	sp|P67779|PHB_RAT, sp|P06761|GRP78_RAT, sp|P07483|FABPH_RAT, sp|P47727|CBR1_RAT, sp|P12346|TRFE_RAT, sp|P01946|HBA_RAT, sp|Q8VIF7|SBP1_RAT
GO:0043234	protein complex	6	sp|P19132|FRIH_RAT, sp|P67779|PHB_RAT, sp|P06761|GRP78_RAT, sp|P02793|FRIL1_RAT, sp|P01946|HBA_RAT, sp|P12346|TRFE_RAT
GO:0005615	extracellular space	6	sp|P06761|GRP78_RAT, sp|P07483|FABPH_RAT, sp|P47727|CBR1_RAT, sp|P12346|TRFE_RAT, sp|P01946|HBA_RAT, sp|Q8VIF7|SBP1_RAT
GO:0043233	organelle lumen	6	sp|P67779|PHB_RAT, sp|P06761|GRP78_RAT, sp|P07483|FABPH_RAT, sp|P47727|CBR1_RAT, sp|P12346|TRFE_RAT, sp|Q8VIF7|SBP1_RAT
GO:0071944	cell periphery	6	sp|P67779|PHB_RAT, sp|P06761|GRP78_RAT, sp|P07483|FABPH_RAT, sp|P47727|CBR1_RAT, sp|P02793|FRIL1_RAT, sp|P12346|TRFE_RAT
GO:0043228	non-membrane-bounded organelle	5	sp|P67779|PHB_RAT, sp|P06761|GRP78_RAT, sp|P07483|FABPH_RAT, sp|P01946|HBA_RAT, sp|Q8VIF7|SBP1_RAT
GO:0005886	plasma membrane	5	sp|P67779|PHB_RAT, sp|P06761|GRP78_RAT, sp|P47727|CBR1_RAT, sp|P02793|FRIL1_RAT, sp|P12346|TRFE_RAT
GO:0043209	myelin sheath	4	sp|P67779|PHB_RAT, sp|P06761|GRP78_RAT, sp|P42123|LDHB_RAT, sp|P01946|HBA_RAT
GO:0005911	cell-cell junction	3	sp|P67779|PHB_RAT, sp|P06761|GRP78_RAT, sp|P07483|FABPH_RAT
GO:0009986	cell surface	3	sp|P67779|PHB_RAT, sp|P06761|GRP78_RAT, sp|P12346|TRFE_RAT
GO:0012505	endomembrane system	3	sp|P67779|PHB_RAT, sp|P06761|GRP78_RAT, sp|P12346|TRFE_RAT
GO:0098805	whole membrane	3	sp|P67779|PHB_RAT, sp|P42123|LDHB_RAT, sp|P12346|TRFE_RAT
GO:0044459	plasma membrane part	3	sp|P67779|PHB_RAT, sp|P02793|FRIL1_RAT, sp|P12346|TRFE_RAT
GO:0031224	intrinsic component of membrane	3	sp|P67779|PHB_RAT, sp|P06761|GRP78_RAT, sp|P12346|TRFE_RAT
GO:0042995	cell projection	3	sp|P07483|FABPH_RAT, sp|P47727|CBR1_RAT, sp|P02793|FRIL1_RAT
GO:0045177	apical part of cell	2	sp|P02793|FRIL1_RAT, sp|P12346|TRFE_RAT
GO:0019898	extrinsic component of membrane	2	sp|P67779|PHB_RAT, sp|P12346|TRFE_RAT
GO:0098796	membrane protein complex	2	sp|P67779|PHB_RAT, sp|P12346|TRFE_RAT
GO:0072562	blood microparticle	2	sp|P12346|TRFE_RAT, sp|P01946|HBA_RAT
GO:0097458	neuron part	2	sp|P07483|FABPH_RAT, sp|P02793|FRIL1_RAT
GO:0098590	plasma membrane region	2	sp|P02793|FRIL1_RAT, sp|P12346|TRFE_RAT
GO:0098589	membrane region	2	sp|P42123|LDHB_RAT, sp|P12346|TRFE_RAT
GO:0031090	organelle membrane	2	sp|P67779|PHB_RAT, sp|P12346|TRFE_RAT
GO:0031012	extracellular matrix	2	sp|P06761|GRP78_RAT, sp|P12346|TRFE_RAT
GO:0019867	outer membrane	1	sp|P67779|PHB_RAT
GO:0030496	midbody	1	sp|P06761|GRP78_RAT
GO:0044297	cell body	1	sp|P07483|FABPH_RAT
GO:0005789	endoplasmic reticulum membrane	1	sp|P06761|GRP78_RAT
GO:0009506	plasmodesma	1	sp|P67779|PHB_RAT
GO:1990204	oxidoreductase complex	1	sp|P67779|PHB_RAT
GO:0098862	cluster of actin-based cell projections	1	sp|P02793|FRIL1_RAT
GO:1902494	catalytic complex	1	sp|P67779|PHB_RAT
GO:0031975	envelope	1	sp|P67779|PHB_RAT
GO:0044455	mitochondrial membrane part	1	sp|P67779|PHB_RAT
GO:0030055	cell-substrate junction	1	sp|P06761|GRP78_RAT
GO:0043235	receptor complex	1	sp|P12346|TRFE_RAT
GO:0044463	cell projection part	1	sp|P02793|FRIL1_RAT
GO:1990351	transporter complex	1	sp|P67779|PHB_RAT
GO:0060171	stereocilium membrane	1	sp|P02793|FRIL1_RAT
GO:0070469	respiratory chain	1	sp|P67779|PHB_RAT
GO:0048475	coated membrane	1	sp|P12346|TRFE_RAT
GO:0032420	stereocilium	1	sp|P02793|FRIL1_RAT
GO:0042175	nuclear outer membrane-endoplasmic reticulum membrane network	1	sp|P06761|GRP78_RAT
GO:0005905	clathrin-coated pit	1	sp|P12346|TRFE_RAT
GO:1990904	ribonucleoprotein complex	1	sp|P01946|HBA_RAT
GO:0070161	anchoring junction	1	sp|P06761|GRP78_RAT
GO:0030964	NADH dehydrogenase complex	1	sp|P67779|PHB_RAT
GO:0051286	cell tip	1	sp|P12346|TRFE_RAT
GO:0098552	side of membrane	1	sp|P12346|TRFE_RAT
GO:0044420	extracellular matrix component	1	sp|P12346|TRFE_RAT
GO:1990415	Pex17p-Pex14p docking complex	1	sp|P67779|PHB_RAT
GO:0045178	basal part of cell	1	sp|P12346|TRFE_RAT
GO Distribution by Level (4)
GO-id	GO-term	#Seqs	Seqs
GO:0044444	cytoplasmic part	11	sp|P19132|FRIH_RAT, sp|P67779|PHB_RAT, sp|P06761|GRP78_RAT, sp|P07483|FABPH_RAT, sp|P42123|LDHB_RAT, tr|D3Z8I7|D3Z8I7_RAT, sp|P47727|CBR1_RAT, sp|P02793|FRIL1_RAT, sp|P12346|TRFE_RAT, sp|P01946|HBA_RAT, sp|Q8VIF7|SBP1_RAT
GO:0031982	vesicle	11	sp|P19132|FRIH_RAT, sp|P67779|PHB_RAT, sp|P06761|GRP78_RAT, sp|P07483|FABPH_RAT, sp|P42123|LDHB_RAT, tr|D3Z8I7|D3Z8I7_RAT, sp|P47727|CBR1_RAT, sp|P02793|FRIL1_RAT, sp|P12346|TRFE_RAT, sp|P01946|HBA_RAT, sp|Q8VIF7|SBP1_RAT
GO:0005737	cytoplasm	11	sp|P19132|FRIH_RAT, sp|P67779|PHB_RAT, sp|P06761|GRP78_RAT, sp|P07483|FABPH_RAT, sp|P42123|LDHB_RAT, tr|D3Z8I7|D3Z8I7_RAT, sp|P47727|CBR1_RAT, sp|P02793|FRIL1_RAT, sp|P12346|TRFE_RAT, sp|P01946|HBA_RAT, sp|Q8VIF7|SBP1_RAT
GO:0043231	intracellular membrane-bounded organelle	10	sp|P19132|FRIH_RAT, sp|P67779|PHB_RAT, sp|P06761|GRP78_RAT, sp|P07483|FABPH_RAT, sp|P42123|LDHB_RAT, tr|D3Z8I7|D3Z8I7_RAT, sp|P47727|CBR1_RAT, sp|P02793|FRIL1_RAT, sp|P12346|TRFE_RAT, sp|Q8VIF7|SBP1_RAT
GO:0070013	intracellular organelle lumen	6	sp|P67779|PHB_RAT, sp|P06761|GRP78_RAT, sp|P07483|FABPH_RAT, sp|P47727|CBR1_RAT, sp|P12346|TRFE_RAT, sp|Q8VIF7|SBP1_RAT
GO:0043232	intracellular non-membrane-bounded organelle	5	sp|P67779|PHB_RAT, sp|P06761|GRP78_RAT, sp|P07483|FABPH_RAT, sp|P01946|HBA_RAT, sp|Q8VIF7|SBP1_RAT
GO:0044428	nuclear part	5	sp|P67779|PHB_RAT, sp|P06761|GRP78_RAT, sp|P07483|FABPH_RAT, sp|P47727|CBR1_RAT, sp|Q8VIF7|SBP1_RAT
GO:0016021	integral component of membrane	3	sp|P67779|PHB_RAT, sp|P06761|GRP78_RAT, sp|P12346|TRFE_RAT
GO:0097708	intracellular vesicle	3	sp|P67779|PHB_RAT, sp|P06761|GRP78_RAT, sp|P12346|TRFE_RAT
GO:0098858	actin-based cell projection	2	sp|P47727|CBR1_RAT, sp|P02793|FRIL1_RAT
GO:0008043	intracellular ferritin complex	2	sp|P19132|FRIH_RAT, sp|P02793|FRIL1_RAT
GO:0070288	ferritin complex	2	sp|P19132|FRIH_RAT, sp|P02793|FRIL1_RAT
GO:0005875	microtubule associated complex	2	sp|P67779|PHB_RAT, sp|P06761|GRP78_RAT
GO:0005768	endosome	2	sp|P67779|PHB_RAT, sp|P12346|TRFE_RAT
GO:0016324	apical plasma membrane	2	sp|P02793|FRIL1_RAT, sp|P12346|TRFE_RAT
GO:0098588	bounding membrane of organelle	2	sp|P67779|PHB_RAT, sp|P12346|TRFE_RAT
GO:0044430	cytoskeletal part	2	sp|P67779|PHB_RAT, sp|P06761|GRP78_RAT
GO:0044429	mitochondrial part	2	sp|P67779|PHB_RAT, sp|P07483|FABPH_RAT
GO:0005604	basement membrane	1	sp|P12346|TRFE_RAT
GO:0098803	respiratory chain complex	1	sp|P67779|PHB_RAT
GO:0031312	extrinsic component of organelle membrane	1	sp|P67779|PHB_RAT
GO:0005887	integral component of plasma membrane	1	sp|P67779|PHB_RAT
GO:0031967	organelle envelope	1	sp|P67779|PHB_RAT
GO:0036477	somatodendritic compartment	1	sp|P07483|FABPH_RAT
GO:0005924	cell-substrate adherens junction	1	sp|P06761|GRP78_RAT
GO:0031838	haptoglobin-hemoglobin complex	1	sp|P01946|HBA_RAT
GO:0005746	mitochondrial respiratory chain	1	sp|P67779|PHB_RAT
GO:0031966	mitochondrial membrane	1	sp|P67779|PHB_RAT
GO:0010008	endosome membrane	1	sp|P12346|TRFE_RAT
GO:0031968	organelle outer membrane	1	sp|P67779|PHB_RAT
GO:0098857	membrane microdomain	1	sp|P42123|LDHB_RAT
GO:0045271	respiratory chain complex I	1	sp|P67779|PHB_RAT
GO:0031226	intrinsic component of plasma membrane	1	sp|P67779|PHB_RAT
GO:0000118	histone deacetylase complex	1	sp|P67779|PHB_RAT
GO:0030117	membrane coat	1	sp|P12346|TRFE_RAT
GO:0012506	vesicle membrane	1	sp|P12346|TRFE_RAT
GO:0005794	Golgi apparatus	1	sp|P67779|PHB_RAT
GO:0044391	ribosomal subunit	1	sp|P01946|HBA_RAT
GO:0034663	endoplasmic reticulum chaperone complex	1	sp|P06761|GRP78_RAT
GO:0019866	organelle inner membrane	1	sp|P67779|PHB_RAT
GO:0005913	cell-cell adherens junction	1	sp|P06761|GRP78_RAT
GO:0009897	external side of plasma membrane	1	sp|P12346|TRFE_RAT
GO:0044433	cytoplasmic vesicle part	1	sp|P12346|TRFE_RAT
GO:0009925	basal plasma membrane	1	sp|P12346|TRFE_RAT
GO:0044432	endoplasmic reticulum part	1	sp|P06761|GRP78_RAT
GO:0005833	hemoglobin complex	1	sp|P01946|HBA_RAT
GO:0098798	mitochondrial protein complex	1	sp|P67779|PHB_RAT
GO:0030141	secretory granule	1	sp|P12346|TRFE_RAT
GO:0032421	stereocilium bundle	1	sp|P02793|FRIL1_RAT
GO:1990712	HFE-transferrin receptor complex	1	sp|P12346|TRFE_RAT
GO:1990429	peroxisomal importomer complex	1	sp|P67779|PHB_RAT
GO:0031253	cell projection membrane	1	sp|P02793|FRIL1_RAT
GO:0031315	extrinsic component of mitochondrial outer membrane	1	sp|P67779|PHB_RAT
GO:0098800	inner mitochondrial membrane protein complex	1	sp|P67779|PHB_RAT
GO:0005912	adherens junction	1	sp|P06761|GRP78_RAT
GO:0044437	vacuolar part	1	sp|P67779|PHB_RAT
GO:0030176	integral component of endoplasmic reticulum membrane	1	sp|P06761|GRP78_RAT
GO:0031983	vesicle lumen	1	sp|P12346|TRFE_RAT
GO:0008180	COP9 signalosome	1	sp|P06761|GRP78_RAT
GO:0019897	extrinsic component of plasma membrane	1	sp|P12346|TRFE_RAT
GO:0031227	intrinsic component of endoplasmic reticulum membrane	1	sp|P06761|GRP78_RAT
GO:0030662	coated vesicle membrane	1	sp|P12346|TRFE_RAT
GO:0005774	vacuolar membrane	1	sp|P67779|PHB_RAT
GO:0016323	basolateral plasma membrane	1	sp|P12346|TRFE_RAT
GO:0043025	neuronal cell body	1	sp|P07483|FABPH_RAT
GO:0030529	intracellular ribonucleoprotein complex	1	sp|P01946|HBA_RAT
GO:0005578	proteinaceous extracellular matrix	1	sp|P12346|TRFE_RAT
GO:0030061	mitochondrial crista	1	sp|P67779|PHB_RAT
GO:0005783	endoplasmic reticulum	1	sp|P06761|GRP78_RAT
GO:0098802	plasma membrane receptor complex	1	sp|P12346|TRFE_RAT
GO Distribution by Level (5)
GO-id	GO-term	#Seqs	Seqs
GO:0005829	cytosol	8	sp|P19132|FRIH_RAT, sp|P07483|FABPH_RAT, sp|P42123|LDHB_RAT, tr|D3Z8I7|D3Z8I7_RAT, sp|P47727|CBR1_RAT, sp|P02793|FRIL1_RAT, sp|P01946|HBA_RAT, sp|Q8VIF7|SBP1_RAT
GO:0005634	nucleus	8	sp|P19132|FRIH_RAT, sp|P67779|PHB_RAT, sp|P06761|GRP78_RAT, sp|P07483|FABPH_RAT, tr|D3Z8I7|D3Z8I7_RAT, sp|P47727|CBR1_RAT, sp|P12346|TRFE_RAT, sp|Q8VIF7|SBP1_RAT
GO:0005739	mitochondrion	5	sp|P19132|FRIH_RAT, sp|P67779|PHB_RAT, sp|P06761|GRP78_RAT, sp|P42123|LDHB_RAT, sp|P07483|FABPH_RAT
GO:0031981	nuclear lumen	4	sp|P67779|PHB_RAT, sp|P07483|FABPH_RAT, sp|P47727|CBR1_RAT, sp|Q8VIF7|SBP1_RAT
GO:0005654	nucleoplasm	3	sp|P67779|PHB_RAT, sp|P07483|FABPH_RAT, sp|P47727|CBR1_RAT
GO:0005811	lipid particle	3	sp|P67779|PHB_RAT, sp|P06761|GRP78_RAT, sp|P07483|FABPH_RAT
GO:0005773	vacuole	3	sp|P19132|FRIH_RAT, sp|P67779|PHB_RAT, sp|P02793|FRIL1_RAT
GO:0031410	cytoplasmic vesicle	3	sp|P67779|PHB_RAT, sp|P06761|GRP78_RAT, sp|P12346|TRFE_RAT
GO:0005730	nucleolus	2	sp|P67779|PHB_RAT, sp|Q8VIF7|SBP1_RAT
GO:0005856	cytoskeleton	2	sp|P67779|PHB_RAT, sp|P06761|GRP78_RAT
GO:0005769	early endosome	2	sp|P67779|PHB_RAT, sp|P12346|TRFE_RAT
GO:0034774	secretory granule lumen	1	sp|P12346|TRFE_RAT
GO:0045121	membrane raft	1	sp|P42123|LDHB_RAT
GO:0031232	extrinsic component of external side of plasma membrane	1	sp|P12346|TRFE_RAT
GO:0044445	cytosolic part	1	sp|P01946|HBA_RAT
GO:0030120	vesicle coat	1	sp|P12346|TRFE_RAT
GO:0030659	cytoplasmic vesicle membrane	1	sp|P12346|TRFE_RAT
GO:0005740	mitochondrial envelope	1	sp|P67779|PHB_RAT
GO:0005790	smooth endoplasmic reticulum	1	sp|P06761|GRP78_RAT
GO:0035632	mitochondrial prohibitin complex	1	sp|P67779|PHB_RAT
GO:0005743	mitochondrial inner membrane	1	sp|P67779|PHB_RAT
GO:0005759	mitochondrial matrix	1	sp|P07483|FABPH_RAT
GO:0005770	late endosome	1	sp|P12346|TRFE_RAT
GO:0005925	focal adhesion	1	sp|P06761|GRP78_RAT
GO:0034399	nuclear periphery	1	sp|P67779|PHB_RAT
GO:0055037	recycling endosome	1	sp|P12346|TRFE_RAT
GO:0016363	nuclear matrix	1	sp|P67779|PHB_RAT
GO:0060205	cytoplasmic vesicle lumen	1	sp|P12346|TRFE_RAT
GO:0097433	dense body	1	sp|P12346|TRFE_RAT
GO:0016528	sarcoplasm	1	sp|P07483|FABPH_RAT
GO:0005793	endoplasmic reticulum-Golgi intermediate compartment	1	sp|P06761|GRP78_RAT
GO:0044440	endosomal part	1	sp|P12346|TRFE_RAT
GO:0005747	mitochondrial respiratory chain complex I	1	sp|P67779|PHB_RAT
GO:0048471	perinuclear region of cytoplasm	1	sp|P12346|TRFE_RAT
GO:0005902	microvillus	1	sp|P47727|CBR1_RAT
GO:0042581	specific granule	1	sp|P12346|TRFE_RAT
GO:0005741	mitochondrial outer membrane	1	sp|P67779|PHB_RAT
GO:0044451	nucleoplasm part	1	sp|P67779|PHB_RAT
GO:0005840	ribosome	1	sp|P01946|HBA_RAT
GO:0042579	microbody	1	tr|D3Z8I7|D3Z8I7_RAT
GO:0015935	small ribosomal subunit	1	sp|P01946|HBA_RAT
GO:0005791	rough endoplasmic reticulum	1	sp|P06761|GRP78_RAT
GO:0005788	endoplasmic reticulum lumen	1	sp|P06761|GRP78_RAT
GO Distribution by Level (6)
GO-id	GO-term	#Seqs	Seqs
GO:0000323	lytic vacuole	2	sp|P19132|FRIH_RAT, sp|P02793|FRIL1_RAT
GO:0005776	autophagosome	2	sp|P19132|FRIH_RAT, sp|P02793|FRIL1_RAT
GO:0015630	microtubule cytoskeleton	2	sp|P67779|PHB_RAT, sp|P06761|GRP78_RAT
GO:0022627	cytosolic small ribosomal subunit	1	sp|P01946|HBA_RAT
GO:0048770	pigment granule	1	sp|P06761|GRP78_RAT
GO:0022626	cytosolic ribosome	1	sp|P01946|HBA_RAT
GO:0099503	secretory vesicle	1	sp|P12346|TRFE_RAT
GO:0005777	peroxisome	1	tr|D3Z8I7|D3Z8I7_RAT
GO:0071682	endocytic vesicle lumen	1	sp|P12346|TRFE_RAT
GO:0030135	coated vesicle	1	sp|P12346|TRFE_RAT
GO:0030139	endocytic vesicle	1	sp|P12346|TRFE_RAT
GO Distribution by Level (7)
GO-id	GO-term	#Seqs	Seqs
GO:0044754	autolysosome	2	sp|P19132|FRIH_RAT, sp|P02793|FRIL1_RAT
GO:0005764	lysosome	2	sp|P19132|FRIH_RAT, sp|P02793|FRIL1_RAT
GO:0045335	phagocytic vesicle	1	sp|P12346|TRFE_RAT
GO:0042470	melanosome	1	sp|P06761|GRP78_RAT
GO:0097013	phagocytic vesicle lumen	1	sp|P12346|TRFE_RAT
GO Distribution by Level (8)
GO-id	GO-term	#Seqs	Seqs
GO:0005767	secondary lysosome	2	sp|P19132|FRIH_RAT, sp|P02793|FRIL1_RAT
